# Supplementary material for: Highly stereoselective syntheses of (E)-δ-boryl-anti-homoallylic alcohols via allylation with α-boryl-(E)-crotylboronate
Source: Royal Society of Chemistry journal article supplement (doi:10.1039/d1cc04058h), 2021-01-01

# Highly Stereoselective Syntheses of (*E*)- $\delta$ -Boryl-*anti*-homoallylic Alcohols via Allylation with $\alpha$ -Boryl-(*E*)-crotylboronate

*Jiaming Liu and Ming Chen\**

Department of Chemistry and Biochemistry

Auburn University

E-mail: [mzc0102@auburn.edu](mailto:mzc0102@auburn.edu)

Supporting Information: Experimental Procedures, Tabulated Spectroscopic Data,  $^1\text{H}$  and

$^{13}\text{C}$  Spectra of New Compounds

**General Experimental Details.** All reaction solvents were purified before use. Tetrahydrofuran, dichloromethane, diethyl ether and toluene were purified by passing through a solvent column composed of activated A-1 alumina. Unless indicated otherwise, all reactions were conducted under an atmosphere of argon using flame-dried or oven-dried (120 °C) glassware. The term “concentrated under reduced pressure” refers to the removal of solvents and other volatile materials using a rotary evaporator with the water bath temperature below 30 °C, followed by removal of residual solvent at high vacuum (< 0.2 mbar).

Proton nuclear magnetic resonance (<sup>1</sup>H NMR) spectra were acquired on commercial instruments (400 and 600 MHz) at Auburn University NMR facility. Carbon-13 nuclear magnetic resonance (<sup>13</sup>C NMR) spectra were acquired at 101 and 151 MHz. The proton signal for residual non-deuterated solvent ( $\delta$  7.26 for CHCl<sub>3</sub>) was used as an internal reference for <sup>1</sup>H NMR spectra. For <sup>13</sup>C NMR spectra, chemical shifts are reported relative to the  $\delta$  77.36 resonance of CHCl<sub>3</sub>. Coupling constants are reported in Hz. Optical rotations were measured on a Perkin Elmer 241 Automatic Polarimeter. High-resolution mass spectra were recorded on a commercial high-resolution mass spectrometer via the Micro Mass/Analytical Facility operated by the College of Chemistry and Biochemistry, Auburn University.

Analytical thin layer chromatography (TLC) was performed on Kieselgel 60 F254 glass plates precoated with a 0.25 mm thickness of silica gel. The TLC plates were visualized with UV light and/or by staining with Hanessian solution (ceric sulfate and ammonium molybdate in aqueous sulfuric acid) or KMnO<sub>4</sub>. Column chromatography was generally performed using Kieselgel 60 (230-400 mesh) silica gel, typically using a 50-100:1 weight ratio of silica gel to crude product.

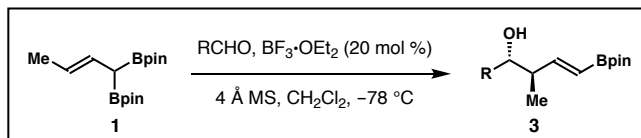

**General procedure for syntheses of homoallylic alcohols 3:** Allylboronate **1**<sup>1</sup> (40 mg, 0.13 mmol, 1.3 equiv), freshly activated 4 Å MS (50 mg), a Teflon-coated magnetic stirring bar and dichloromethane (1 mL) were sequentially added into a reaction flask. The flask was placed into a  $-78^\circ\text{C}$  acetone/dry ice bath.  $\text{BF}_3\cdot\text{Et}_2\text{O}$  (20 mol %) was added to the flask *via* a microliter syringe, and the resulting mixture was stirred for 10 min at  $-78^\circ\text{C}$ . Then freshly distilled aldehyde (0.1 mmol, 1.0 equiv, if it is a liquid) was added, and the reaction mixture was kept stirring at  $-78^\circ\text{C}$ . After complete consumption of the aldehyde (3-5 h for aromatic aldehydes, 12 h for aliphatic aldehydes), saturated  $\text{NaHCO}_3$  solution (1.0 mL) was added to the reaction mixture. The organic layer was separated and the aqueous layer was extracted with  $\text{Et}_2\text{O}$  (2 mL x 3). The combined organic extracts were dried over anhydrous sodium sulfate, filtered, and concentrated under reduced pressure. Purification of the crude product was performed by column (gradient elution with hexane and ethyl acetate) to give product **3**.

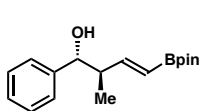

***rac*-(1*R*,2*R*,*E*)-2-Methyl-1-phenyl-4-(4,4,5,5-tetramethyl-1,3,2-dioxaborolan-2-yl)but-3-en-1-ol (3a)** Prepared according to the general procedure to give compound **3a** in 97% yield (28 mg) as colorless oil.

$^1\text{H}$  NMR (600 MHz,  $\text{CDCl}_3$ )  $\delta$  7.26 – 7.35 (m, 5H), 6.62 (dd,  $J = 18.0, 8.1$  Hz, 1H), 5.62 (d,  $J = 18.0$  Hz, 1H), 4.37 (d,  $J = 8.5$  Hz, 1H), 2.51 – 2.57 (m, 1H), 2.23 (brs, 1H), 1.27 (s, 12H), 0.82 (d,  $J = 6.8$  Hz, 3H).  $^{13}\text{C}$  NMR (151 MHz,  $\text{CDCl}_3$ )  $\delta$  156.1, 142.5, 128.6, 128.1, 127.3, 121.2, 83.6, 78.1, 48.6, 25.1, 16.7. HRMS (ESI<sup>+</sup>):  $m/z$  for  $\text{C}_{17}\text{H}_{25}\text{BO}_3\text{Na}$  [ $\text{M}+\text{Na}$ ]<sup>+</sup> calcd. 311.1794, found: 311.1805.

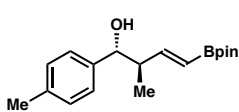

***rac*-(1*R*,2*R*,*E*)-2-Methyl-4-(4,4,5,5-tetramethyl-1,3,2-dioxaborolan-2-yl)-1-(*p*-tolyl)but-3-en-1-ol (3b)** Prepared according to the general procedure. The crude mixture was purified by column

chromatography to give compound **3b** in 89% yield (27 mg) as colorless oil.  $^1\text{H}$  NMR (600 MHz,  $\text{CDCl}_3$ )  $\delta$  7.22 (d,  $J = 7.7$  Hz, 2H), 7.15 (d,  $J = 7.6$  Hz, 2H), 6.62 (dd,  $J = 18.0, 8.1$  Hz, 1H), 5.62 (d,  $J = 18.0$  Hz, 1H), 4.33 (d,  $J = 8.2$  Hz, 1H), 2.50 – 2.56 (m, 1H), 2.34 (s, 3H), 2.08 (s, 1H), 1.28 (s, 12H), 0.81 (d,  $J = 6.7$  Hz, 3H).  $^{13}\text{C}$  NMR (151 MHz,  $\text{CDCl}_3$ )  $\delta$  156.3, 139.5, 137.8, 129.3, 127.2, 83.6, 78.0, 48.6, 25.14, 25.13, 21.5, 16.8. HRMS (ESI<sup>+</sup>):  $m/z$  for  $\text{C}_{18}\text{H}_{27}\text{BO}_3\text{Na}$  [ $\text{M}+\text{Na}$ ]<sup>+</sup> calcd. 325.1951, found: 325.1959.

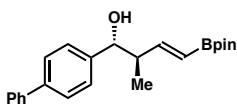

***rac*-(1*R*,2*R*,*E*)-1-([1,1'-biphenyl]-4-yl)-2-methyl-4-(4,4,5,5-tetramethyl-1,3,2-dioxaborolan-2-yl)but-3-en-1-ol (3c)** Prepared according to the general procedure. The crude mixture was purified by column chromatography to give compound **3c** in 96% yield (35 mg) as colorless oil. <sup>1</sup>H NMR (600 MHz, CDCl<sub>3</sub>) δ 7.59 (d, *J* = 7.6 Hz, 2H), 7.57 (d, *J* = 8.1 Hz, 2H), 7.44 (t, *J* = 7.6 Hz, 2H), 7.41 (d, *J* = 8.0 Hz, 2H), 7.35 (dd, *J* = 7.3, 7.3 Hz, 1H), 6.64 (dd, *J* = 18.0, 8.1 Hz, 1H), 5.66 (d, *J* = 18.0 Hz, 1H), 4.42 (d, *J* = 8.2 Hz, 1H), 2.56 – 2.62 (m, 1H), 2.16 (d, *J* = 1.9 Hz, 1H), 1.29 (s, 12H), 0.87 (d, *J* = 6.7 Hz, 3H). <sup>13</sup>C NMR (151 MHz, CDCl<sub>3</sub>) δ 156.0, 141.5, 141.1, 140.9, 129.1, 127.7, 127.6, 127.41, 127.39, 83.6, 77.9, 48.7, 25.1, 16.8. HRMS (ESI<sup>+</sup>): *m/z* for C<sub>23</sub>H<sub>29</sub>BO<sub>3</sub>Na [M+Na]<sup>+</sup> calcd. 387.2107, found: 387.2092.

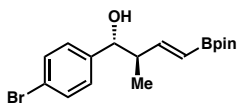

***rac*-(1*R*,2*R*,*E*)-1-(4-Bromophenyl)-2-methyl-4-(4,4,5,5-tetramethyl-1,3,2-dioxaborolan-2-yl)but-3-en-1-ol (3d)** Prepared according to the general procedure. The crude mixture was purified by column to give compound **3d** in 71% yield (26 mg) as colorless oil. <sup>1</sup>H NMR (600 MHz, CDCl<sub>3</sub>) δ 7.46 (d, *J* = 8.3 Hz, 2H), 7.21 (d, *J* = 8.3 Hz, 2H), 6.56 (dd, *J* = 18.0, 8.1 Hz, 1H), 5.61 (d, *J* = 18.0 Hz, 1H), 4.35 (d, *J* = 8.3 Hz, 1H), 2.46 – 2.52 (m, 1H), 1.74 (brs, 1H), 1.28 (s, 12H), 0.83 (d, *J* = 6.8 Hz, 3H). <sup>13</sup>C NMR (151 MHz, CDCl<sub>3</sub>) δ 155.4, 141.4, 131.7, 129.0, 121.9, 83.7, 77.4, 48.7, 25.1, 16.5. HRMS (ESI<sup>+</sup>): *m/z* for C<sub>17</sub>H<sub>24</sub>BO<sub>3</sub>NaBr [M+Na]<sup>+</sup> calcd. 389.0900, found: 389.0903; [M+2+Na]<sup>+</sup> found: 391.0882.

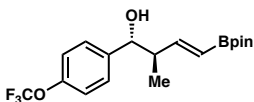

***rac*-(1*R*,2*R*,*E*)-2-Methyl-4-(4,4,5,5-tetramethyl-1,3,2-dioxaborolan-2-yl)-1-(4-(trifluoromethoxy)phenyl)but-3-en-1-ol (3e)** Prepared according to the general procedure. The crude mixture was purified by column chromatography to give compound **3e** in 94% yield (35 mg) as colorless oil. <sup>1</sup>H NMR (600 MHz, CDCl<sub>3</sub>) δ 7.36 (d, *J* = 8.6 Hz, 2H), 7.19 (d, *J* = 8.2 Hz, 2H), 6.57 (dd, *J* = 18.0, 8.2 Hz, 1H), 5.63 (d, *J* = 18.0 Hz, 1H), 4.39 (d, *J* = 8.2 Hz, 1H), 2.47 – 2.53 (m, 1H), 2.20 (s, 1H), 1.28 (s, 12H), 0.83 (d, *J* = 6.8 Hz, 3H). <sup>13</sup>C NMR (151 MHz, CDCl<sub>3</sub>) δ 155.4, 148.9, 141.1, 128.7, 121.9, 121.2, 120.7 (q, *J* = 257 Hz), 83.7, 77.3, 48.8, 25.1, 16.6. HRMS (ESI<sup>+</sup>): *m/z* for C<sub>18</sub>H<sub>24</sub>BO<sub>4</sub>F<sub>3</sub>Na [M+Na]<sup>+</sup> calcd. 395.1617, found: 395.1614. <sup>19</sup>F NMR (471 MHz, CDCl<sub>3</sub>) δ – 57.87.

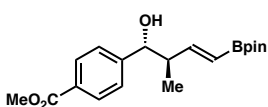

***rac*-Methyl-4-((1*R*,2*R*,*E*)-1-hydroxy-2-methyl-4-(4,4,5,5-tetramethyl-1,3,2-dioxaborolan-2-yl)but-3-en-1-yl)benzoate (3f)** Prepared according to the general procedure. The crude mixture was purified by column chromatography to give compound **3f** in 78% yield (27 mg) as

colorless oil.  $^1\text{H}$  NMR (600 MHz,  $\text{CDCl}_3$ )  $\delta$  8.01 (d,  $J = 8.0$  Hz, 2H), 7.40 (d,  $J = 8.1$  Hz, 2H), 6.56 (dd,  $J = 18.0, 8.1$  Hz, 1H), 5.61 (d,  $J = 18.0$  Hz, 1H), 4.45 (d,  $J = 7.8$  Hz, 1H), 3.91 (s, 3H), 2.50 – 2.56 (m, 1H), 2.25 (s, 1H), 1.28 (s, 12H), 0.83 (d,  $J = 6.7$  Hz, 3H).  $^{13}\text{C}$  NMR (151 MHz,  $\text{CDCl}_3$ )  $\delta$  167.3, 155.2, 147.6, 129.9, 129.7, 127.3, 121.9, 83.7, 77.6, 52.5, 48.6, 25.1, 16.5. HRMS (ESI $^+$ ):  $m/z$  for  $\text{C}_{19}\text{H}_{27}\text{BO}_5\text{Na}$   $[\text{M}+\text{Na}]^+$  calcd. 369.1849, found: 369.1835.

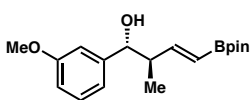

***rac*-(1*R*,2*R*,*E*)-1-(3-methoxyphenyl)-2-methyl-4-(4,4,5,5-tetramethyl-1,3,2-dioxaborolan-2-yl)but-3-en-1-ol (3g)** Prepared according to the general procedure. The crude mixture was purified by column chromatography to give compound **3g** in 75% yield (24 mg) as colorless oil.  $^1\text{H}$  NMR (600 MHz,  $\text{CDCl}_3$ )  $\delta$  7.24 – 7.26 (m, 1H), 6.87 – 6.91 (m, 2H), 6.82 (dd,  $J = 8.2, 1.7$  Hz, 1H), 6.61 (dd,  $J = 18.0, 8.1$  Hz, 1H), 5.62 (d,  $J = 18.0$  Hz, 1H), 4.35 (d,  $J = 8.4$  Hz, 1H), 3.81 (s, 3H), 2.51 – 2.57 (m, 1H), 2.12 (brs, 1H), 1.28 (s, 12H), 0.83 (d,  $J = 6.8$  Hz, 3H).  $^{13}\text{C}$  NMR (151 MHz,  $\text{CDCl}_3$ )  $\delta$  159.8, 156.0, 144.1, 129.6, 119.7, 113.7, 112.4, 83.6, 78.1, 55.6, 48.5, 25.1, 16.7. HRMS (EI $^+$ ):  $m/z$  for  $\text{C}_{18}\text{H}_{27}\text{BO}_4$   $[\text{M}]^+$  calcd. 318.2002, found: 318.2008.

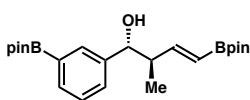

***rac*-(1*R*,2*R*,*E*)-2-Methyl-4-(4,4,5,5-tetramethyl-1,3,2-dioxaborolan-2-yl)-1-(3-(4,4,5,5-tetramethyl-1,3,2-dioxaborolan-2-yl)phenyl)but-3-en-1-ol (3h)** Prepared according to the general procedure. The crude mixture was purified by column chromatography to give compound **3h** in 87% yield (36 mg) as colorless oil.  $^1\text{H}$  NMR (600 MHz,  $\text{CDCl}_3$ )  $\delta$  7.73 (d,  $J = 8.6$  Hz, 2H), 7.45 (d,  $J = 7.7$  Hz, 1H), 7.36 (dd,  $J = 7.4, 7.4$  Hz, 1H), 6.61 (dd,  $J = 18.0, 8.2$  Hz, 1H), 5.63 (d,  $J = 18.0$  Hz, 1H), 4.38 (dd,  $J = 8.5, 2.0$  Hz, 1H), 2.56 – 2.62 (m, 1H), 2.10 (d,  $J = 2.3$  Hz, 1H), 1.34 (s, 12H), 1.28 (s, 12H), 0.82 (d,  $J = 6.8$  Hz, 3H).  $^{13}\text{C}$  NMR (151 MHz,  $\text{CDCl}_3$ )  $\delta$  156.1, 141.8, 134.7, 133.6, 130.3, 128.2, 84.2, 83.6, 78.2, 48.6, 25.21, 25.17, 25.14, 16.9. HRMS (ESI $^+$ ):  $m/z$  for  $\text{C}_{23}\text{H}_{36}\text{B}_2\text{O}_5\text{Na}$   $[\text{M}+\text{Na}]^+$  calcd. 437.2647, found: 437.2667.

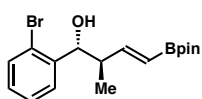

***rac*-(1*R*,2*R*,*E*)-1-(2-Bromophenyl)-2-methyl-4-(4,4,5,5-tetramethyl-1,3,2-dioxaborolan-2-yl)but-3-en-1-ol (3i)** Prepared according to the general procedure. The crude mixture was purified by column to give compound **3i** in 93% yield (34 mg) as colorless oil.  $^1\text{H}$  NMR (600 MHz,  $\text{CDCl}_3$ )  $\delta$  7.51 (d,  $J = 7.9$  Hz, 1H), 7.48 (d,  $J = 6.9$  Hz, 1H), 7.33 (dd,  $J = 7.3, 7.3$  Hz, 1H), 7.12 (dd,  $J = 7.4, 7.4$  Hz, 1H), 6.65 (dd,  $J = 18.0, 7.8$  Hz, 1H), 5.57 (d,  $J = 18.0$  Hz, 1H), 4.97 (dd,  $J = 7.3,$

2.9 Hz, 1H), 2.60 – 2.66 (m, 1H), 2.23 (d,  $J = 2.7$  Hz, 1H), 1.27 (s, 12H), 0.97 (d,  $J = 6.9$  Hz, 3H).  $^{13}\text{C}$  NMR (151 MHz,  $\text{CDCl}_3$ )  $\delta$  155.2, 141.8, 132.8, 129.3, 128.7, 128.0, 123.5, 121.4, 83.6, 75.7, 47.9, 25.11, 25.10, 16.5. HRMS ( $\text{ESI}^+$ ):  $m/z$  for  $\text{C}_{17}\text{H}_{24}\text{BO}_3\text{NaBr}$   $[\text{M}+\text{Na}]^+$  calcd. 389.0900, found: 389.0897;  $[\text{M}+2+\text{Na}]^+$  found: 391.0895.

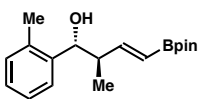

***rac*-(1*R*,2*R*,*E*)-2-Methyl-4-(4,4,5,5-tetramethyl-1,3,2-dioxaborolan-2-yl)-1-(*o*-tolyl)but-3-en-1-ol (3j)** Prepared according to the general procedure. The crude mixture was purified by column chromatography

to give compound **3j** in 83% yield (25 mg) as colorless oil.  $^1\text{H}$  NMR (600 MHz,  $\text{CDCl}_3$ )  $\delta$  7.41 (d,  $J = 7.7$  Hz, 1H), 7.23 (dd,  $J = 7.4, 7.4$  Hz, 1H), 7.17 (dd,  $J = 7.3, 7.3$  Hz, 1H), 7.13 (d,  $J = 7.4$  Hz, 1H), 6.67 (dd,  $J = 18.0, 8.1$  Hz, 1H), 5.64 (d,  $J = 18.0$  Hz, 1H), 4.72 (dd,  $J = 8.5, 1.9$  Hz, 1H), 2.59 – 2.65 (m, 1H), 2.35 (s, 3H), 2.02 (d,  $J = 2.1$  Hz, 1H), 1.28 (s, 12H), 0.85 (d,  $J = 6.8$  Hz, 3H).  $^{13}\text{C}$  NMR (151 MHz,  $\text{CDCl}_3$ )  $\delta$  156.3, 140.7, 135.9, 130.6, 127.7, 126.7, 126.6, 121.4, 83.6, 73.5, 48.5, 25.1, 20.0, 16.5. HRMS ( $\text{ESI}^+$ ):  $m/z$  for  $\text{C}_{18}\text{H}_{27}\text{BO}_3\text{Na}$   $[\text{M}+\text{Na}]^+$  calcd. 325.1951, found: 325.1964.

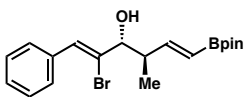

***rac*-(1*Z*,3*R*,4*R*,5*E*)-2-Bromo-4-methyl-1-phenyl-6-(4,4,5,5-tetramethyl-1,3,2-dioxaborolan-2-yl)hexa-1,5-dien-3-ol (3k)** Prepared according to the general procedure. The crude mixture was purified

to give compound **3k** in 84% yield (33 mg) as white solid.  $^1\text{H}$  NMR (600 MHz,  $\text{CDCl}_3$ )  $\delta$  7.61 (d,  $J = 7.5$  Hz, 2H), 7.37 (dd,  $J = 7.5, 7.5$  Hz, 2H), 7.32 (dd,  $J = 7.3, 7.3$  Hz, 1H), 7.02 (s, 1H), 6.64 (dd,  $J = 18.0, 7.9$  Hz, 1H), 5.64 (d,  $J = 18.0$  Hz, 1H), 3.97 (dd,  $J = 8.3, 5.4$  Hz, 1H), 2.69 – 2.75 (m, 1H), 2.13 (d,  $J = 5.3$  Hz, 1H), 1.28 (s, 12H), 1.02 (d,  $J = 6.8$  Hz, 3H).  $^{13}\text{C}$  NMR (151 MHz,  $\text{CDCl}_3$ )  $\delta$  154.5, 135.2, 130.6, 129.5, 128.6, 128.52, 128.49, 121.5, 83.6, 81.2, 45.0, 25.1, 16.7. HRMS ( $\text{ESI}^+$ ):  $m/z$  for  $\text{C}_{19}\text{H}_{26}\text{BO}_3\text{NaBr}$   $[\text{M}+\text{Na}]^+$  calcd. 415.1056, found: 415.1045;  $[\text{M}+2+\text{Na}]^+$  found: 417.1033.

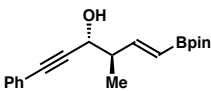

***rac*-(3*R*,4*R*,*E*)-4-Methyl-1-phenyl-6-(4,4,5,5-tetramethyl-1,3,2-dioxaborolan-2-yl)hex-5-en-1-yn-3-ol (3l)** Prepared according to the general procedure. The crude mixture was purified by column

chromatography to give compound **3l** in 90% yield (28 mg) as colorless oil.  $^1\text{H}$  NMR (400 MHz,  $\text{CDCl}_3$ )  $\delta$  7.42 – 7.44 (m, 2H), 7.30 – 7.35 (m, 3H), 6.63 (dd,  $J = 18.1, 7.3$  Hz, 1H), 5.62 (d,  $J = 18.1$  Hz, 1H), 4.48 (dd,  $J = 6.0, 6.0$  Hz, 1H), 2.59 – 2.67 (m, 1H), 1.98 (d,  $J = 5.4$  Hz, 1H), 1.28 (s, 12H), 1.22 (d,  $J = 6.8$  Hz, 3H).  $^{13}\text{C}$  NMR (151 MHz,  $\text{CDCl}_3$ )  $\delta$  154.2, 132.1, 128.8, 128.6, 123.0, 88.7, 86.4, 83.6, 66.8, 46.8, 25.2, 25.1, 15.6. HRMS ( $\text{ESI}^+$ ):  $m/z$  for  $\text{C}_{19}\text{H}_{25}\text{BO}_3\text{Na}$   $[\text{M}+\text{Na}]^+$  calcd. 335.1794, found: 335.1779.

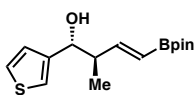

***rac*-(1*R*,2*R*,*E*)-2-Methyl-4-(4,4,5,5-tetramethyl-1,3,2-dioxaborolan-2-yl)-1-(thiophen-3-yl)but-3-en-1-ol (3m)** Prepared according to the general procedure. The crude mixture was purified by column

chromatography to give compound **3m** in 75% yield (22 mg) as colorless oil. <sup>1</sup>H NMR (600 MHz, CDCl<sub>3</sub>) δ 7.29 (dd, *J* = 4.9, 3.0 Hz, 1H), 7.19 (d, *J* = 2.6 Hz, 1H), 7.08 (d, *J* = 4.9 Hz, 1H), 6.61 (dd, *J* = 18.0, 7.8 Hz, 1H), 5.61 (d, *J* = 18.0 Hz, 1H), 4.55 (dd, *J* = 7.9, 2.6 Hz, 1H), 2.56 – 2.62 (m, 1H), 2.04 (d, *J* = 3.0 Hz, 1H), 1.28 (s, 12H), 0.90 (d, *J* = 6.8 Hz, 3H). <sup>13</sup>C NMR (151 MHz, CDCl<sub>3</sub>) δ 155.6, 144.1, 126.3, 126.2, 122.2, 83.6, 74.2, 47.9, 25.2, 16.5. HRMS (EI<sup>+</sup>): *m/z* for C<sub>15</sub>H<sub>23</sub>BO<sub>3</sub>S [M]<sup>+</sup> calcd. 294.1461, found: 294.1455.

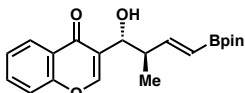

***rac*-3-((1*R*,2*R*,*E*)-1-Hydroxy-2-methyl-4-(4,4,5,5-tetramethyl-1,3,2-dioxaborolan-2-yl)but-3-en-1-yl)-4*H*-chromen-4-one (3n)**

Prepared according to the general procedure. The crude mixture was purified by column chromatography to give compound **3n** in 98% yield (35 mg) as colorless oil. <sup>1</sup>H NMR (600 MHz, CDCl<sub>3</sub>) δ 8.19 (d, *J* = 7.9 Hz, 1H), 7.87 (s, 1H), 7.69 (dd, *J* = 7.3, 7.3 Hz, 1H), 7.47 (d, *J* = 8.4 Hz, 1H), 7.42 (dd, *J* = 7.5, 7.5 Hz, 1H), 6.68 (dd, *J* = 18.1, 7.4 Hz, 1H), 5.54 (d, *J* = 18.1 Hz, 1H), 4.46 (dd, *J* = 7.3, 7.3 Hz, 1H), 3.43 (d, *J* = 7.5 Hz, 1H), 2.84 – 2.89 (m, 1H), 1.26 (s, 12H), 1.02 (d, *J* = 6.8 Hz, 3H). <sup>13</sup>C NMR (151 MHz, CDCl<sub>3</sub>) δ 178.3, 156.4, 155.2, 153.7, 134.2, 126.0, 125.6, 124.2, 124.1, 120.7, 118.5, 83.5, 73.3, 45.3, 25.13, 25.08, 17.1. HRMS (ESI<sup>+</sup>): *m/z* for C<sub>20</sub>H<sub>25</sub>BO<sub>5</sub>Na [M+Na]<sup>+</sup> calcd. 379.1693, found: 379.1676

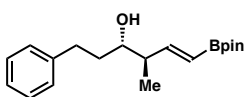

***rac*-(3*S*,4*R*,*E*)-4-Methyl-1-phenyl-6-(4,4,5,5-tetramethyl-1,3,2-dioxaborolan-2-yl)hex-5-en-3-ol (3o)** Prepared according to the general procedure. The crude mixture was purified by flash column

chromatography to give compound **3o** in 79% yield (25 mg) as colorless oil. <sup>1</sup>H NMR (600 MHz, CDCl<sub>3</sub>) δ 7.27 – 7.29 (m, 2H), 7.17 – 7.21 (m, 3H), 6.53 (dd, *J* = 18.0, 7.9 Hz, 1H), 5.52 (d, *J* = 18.0 Hz, 1H), 3.45 – 3.48 (m, 1H), 2.82 – 2.86 (m, 1H), 2.64 – 2.69 (m, 1H), 2.29 – 2.34 (m, 1H), 1.80 – 1.85 (m, 1H), 1.66 – 1.73 (m, 1H), 1.57 (d, *J* = 4.4 Hz, 1H), 1.27 (s, 12H), 1.03 (d, *J* = 6.7 Hz, 3H). <sup>13</sup>C NMR (151 MHz, CDCl<sub>3</sub>) δ 155.5, 142.5, 128.8, 128.7, 126.1, 83.6, 74.2, 46.5, 36.3, 32.5, 25.14, 25.10, 16.1. HRMS (EI<sup>+</sup>): *m/z* for C<sub>19</sub>H<sub>27</sub>BO<sub>2</sub> [M-H<sub>2</sub>O]<sup>+</sup> calcd. 298.2104, found: 298.2116.

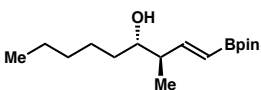

***rac*-(3*R*,4*S*,*E*)-3-Methyl-1-(4,4,5,5-tetramethyl-1,3,2-dioxaborolan-2-yl)non-1-en-4-ol (3p)** Prepared according to the general

procedure. The crude mixture was purified by flash column chromatography to give compound **3p** in 81% yield (23 mg) as colorless oil.  $^1\text{H}$  NMR (600 MHz,  $\text{CDCl}_3$ )  $\delta$  6.55 (dd,  $J = 18.1, 7.8$  Hz, 1H), 5.51 (d,  $J = 18.1$  Hz, 1H), 3.43 – 3.46 (m, 1H), 2.27 – 2.32 (m, 1H), 1.44 – 1.52 (m, 3H), 1.27 – 1.39 (m, 18H), 1.03 (d,  $J = 6.7$  Hz, 3H), 0.88 (t,  $J = 6.5$  Hz, 3H).  $^{13}\text{C}$  NMR (151 MHz,  $\text{CDCl}_3$ )  $\delta$  155.7, 120.7, 83.5, 75.0, 46.2, 34.4, 32.2, 25.8, 25.2, 25.1, 23.0, 16.1, 14.5. HRMS ( $\text{EI}^+$ ):  $m/z$  for  $\text{C}_{16}\text{H}_{29}\text{BO}_2$   $[\text{M}-\text{H}_2\text{O}]^+$  calcd. 264.2261, found: 264.2256.

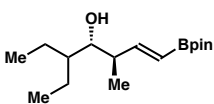

***rac*-(3*R*,4*S*,*E*)-5-Ethyl-3-methyl-1-(4,4,5,5-tetramethyl-1,3,2-dioxaborolan-2-yl)hept-1-en-4-ol (**3q**)** Prepared according to the general procedure. The crude mixture was purified by column chromatography

to give compound **3q** in 81% yield (23 mg) as colorless oil.  $^1\text{H}$  NMR (600 MHz,  $\text{CDCl}_3$ )  $\delta$  6.56 (dd,  $J = 18.0, 8.1$  Hz, 1H), 5.53 (d,  $J = 18.0$  Hz, 1H), 3.36 – 3.39 (m, 1H), 2.41 – 2.47 (m, 1H), 1.51 – 1.55 (m, 1H), 1.42 – 1.48 (m, 1H), 1.36 – 1.40 (m, 1H), 1.34 (d,  $J = 4.8$  Hz, 1H), 1.27 (s, 12H), 1.22 – 1.26 (m, 1H), 1.00 (d,  $J = 6.7$  Hz, 3H), 0.86 – 0.90 (m, 6H).  $^{13}\text{C}$  NMR (151 MHz,  $\text{CDCl}_3$ )  $\delta$  156.5, 83.5, 75.6, 43.6, 42.9, 25.14, 25.11, 22.4, 20.4, 17.0, 12.0, 11.6. HRMS ( $\text{EI}^+$ ):  $m/z$  for  $\text{C}_{16}\text{H}_{29}\text{BO}_2$   $[\text{M}-\text{H}_2\text{O}]^+$  calcd. 264.2261, found: 264.2257.

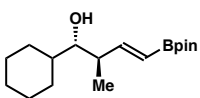

***rac*-(1*S*,2*R*,*E*)-1-Cyclohexyl-2-methyl-4-(4,4,5,5-tetramethyl-1,3,2-dioxaborolan-2-yl)but-3-en-1-ol (**3r**)** Prepared according to the general procedure. The crude mixture was purified by column chromatography

to give compound **3r** in 95% yield (28 mg) as colorless oil.  $^1\text{H}$  NMR (600 MHz,  $\text{CDCl}_3$ )  $\delta$  6.57 (dd,  $J = 18.1, 8.0$  Hz, 1H), 5.51 (d,  $J = 18.1$  Hz, 1H), 3.12 – 3.15 (m, 1H), 2.43 – 2.47 (m, 1H), 1.70 – 1.81 (m, 3H), 1.60 – 1.65 (m, 2H), 1.37 – 1.43 (m, 2H), 1.09 – 1.26 (m, 16H), 1.01 – 1.07 (m, 4H).  $^{13}\text{C}$  NMR (151 MHz,  $\text{CDCl}_3$ )  $\delta$  155.8, 120.7, 83.5, 79.3, 42.7, 40.5, 30.3, 27.3, 26.8, 26.7, 26.4, 25.2, 25.1, 17.0. HRMS ( $\text{EI}^+$ ):  $m/z$  for  $\text{C}_{17}\text{H}_{29}\text{BO}_2$   $[\text{M}-\text{H}_2\text{O}]^+$  calcd. 276.2261, found: 276.2250.

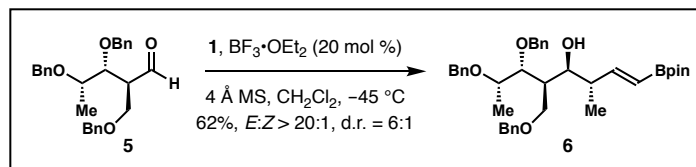

**Synthesis of homoallylic alcohol 6:** Prepared according to the general procedure from aldehyde **5** at  $-45$  °C for about 12 h. The crude mixture was purified by flash column



chromatography to give compound **6** in 62% yield (37 mg, *E:Z* > 20:1, dr = 6:1) as a colorless oil.  $[\alpha]_D^{20} = -0.04$  (c 1.35, CHCl<sub>3</sub>); <sup>1</sup>H NMR (600 MHz, CDCl<sub>3</sub>) δ 7.23 – 7.34 (m, 13H), 7.19 – 7.21 (m, 2H), 6.67 (dd, *J* = 18.0, 7.6 Hz, 1H), 5.48 (d, *J* = 18.1, 1H), 4.83 (d, *J*<sub>AB</sub> = 11.0 Hz, 1H), 4.63 (d, *J*<sub>AB</sub> = 11.6 Hz, 1H), 4.53 (d, *J*<sub>AB</sub> = 11.6 Hz, 1H), 4.49 (d, *J*<sub>AB</sub> = 10.9 Hz, 1H), 4.45 (d, *J*<sub>AB</sub> = 11.9 Hz, 1H), 4.36 (d, *J*<sub>AB</sub> = 12.1 Hz, 1H), 3.94 (dd, *J* = 7.1, 3.5 Hz, 1H), 3.77 – 3.81 (m, 1H), 3.74 (app. d, *J* = 8.9 Hz, 1H), 3.69 (d, *J* = 2.4 Hz, 1H), 3.67 (dd, *J* = 9.7, 7.9 Hz, 1H), 3.63 (dd, *J* = 9.7, 4.3 Hz, 1H), 2.36 – 2.42 (m, 1H), 2.05 – 2.08 (m, 1H), 1.24 (s, 12H), 1.18 (d, *J* = 6.3 Hz, 3H), 0.94 (d, *J* = 6.8 Hz, 3H). <sup>13</sup>C NMR (126 MHz, CDCl<sub>3</sub>) δ 157.8, 138.9, 138.7, 138.4, 128.8, 128.73, 128.72, 128.4, 128.22, 128.20, 128.1, 128.0, 127.9, 83.5, 83.3, 77.6 (assigned via DEPT 135), 76.2, 74.3, 73.6, 72.1, 67.0, 43.7, 41.3, 25.2, 17.0, 16.8. HRMS (ESI<sup>+</sup>): *m/z* for C<sub>37</sub>H<sub>49</sub>BO<sub>6</sub>Na [M+Na]<sup>+</sup> calcd. 623.3520, found: 623.3494.

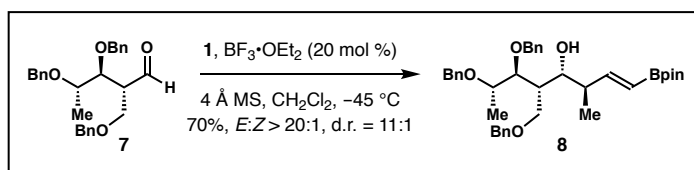

**Synthesis of homoallylic alcohol **8**:** Prepared according to the general procedure from aldehyde **7** at  $-45 \text{ }^\circ\text{C}$  for about 12 h. The crude mixture was purified by flash column chromatography to give compound **8** in 70% yield (42 mg, *E:Z* > 20:1, dr = 11:1) as a colorless oil.  $[\alpha]_D^{20} = +0.3$  (c 2.2, CHCl<sub>3</sub>); <sup>1</sup>H NMR (600 MHz, CDCl<sub>3</sub>) δ 7.30 – 7.34 (m, 8H), 7.24 – 7.30 (m, 7H), 6.67 (dd, *J* = 18.0, 7.8 Hz, 1H), 5.47 (d, *J* = 18.0 Hz, 1H), 4.67 (d, *J*<sub>AB</sub> = 11.0 Hz, 1H), 4.61 (d, *J*<sub>AB</sub> = 11.7 Hz, 1H), 4.47 – 4.50 (m, 2H), 4.45 (d, *J*<sub>AB</sub> = 11.7 Hz, 1H), 4.39 (d, *J*<sub>AB</sub> = 11.8 Hz, 1H), 3.94 (dd, *J* = 5.6, 4.0 Hz, 1H), 3.91 – 3.93 (m, 1H), 3.73 – 3.77 (m, 1H), 3.64 – 3.71 (m, 2H), 3.34 (d, *J* = 2.6 Hz, 1H), 2.35 – 2.41 (m, 1H), 2.21–2.24 (m, 1H), 1.30 (d, *J* = 6.2 Hz, 3H), 1.24 (s, 12H), 0.92 (d, *J* = 6.8 Hz, 3H). <sup>13</sup>C NMR (126 MHz, CDCl<sub>3</sub>) δ 157.9, 138.9, 138.5, 138.4, 128.8 (two overlapping carbon signals), 128.7, 128.3, 128.2, 128.09, 128.05, 128.0, 127.9, 83.3, 82.6, 75.6, 75.0, 74.3, 73.6, 71.0, 67.5, 43.9, 41.4, 25.2, 17.2, 16.4. HRMS (ESI<sup>+</sup>): *m/z* for C<sub>37</sub>H<sub>49</sub>BO<sub>6</sub>Na [M+Na]<sup>+</sup> calcd. 623.3520, found: 623.3533.

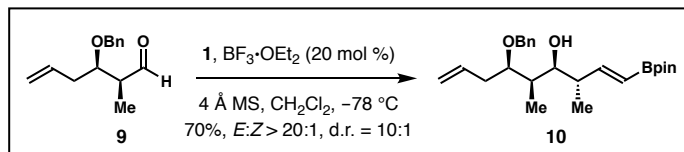

**Synthesis of homoallylic alcohol 10:** Prepared according to the general procedure from aldehyde **9** at  $-45\text{ }^{\circ}\text{C}$  for about 12 h. The crude mixture was purified by flash column chromatography to give compound **10** in 70% yield (28 mg,  $E:Z > 20:1$ ,  $dr = 10:1$ ) as colorless oil.  $[\alpha]_{\text{D}}^{20} = -3.6$  (c 0.15,  $\text{CHCl}_3$ );  $^1\text{H NMR}$  (600 MHz,  $\text{CDCl}_3$ )  $\delta$  7.25 – 7.28 (m, 2H), 7.21 – 7.25 (m, 3H), 6.55 (dd,  $J = 18.0, 8.0$  Hz, 1H), 5.72 – 5.77 (m, 1H), 5.44 (d,  $J = 18.0$  Hz, 1H), 5.07 (dd, d,  $J = 17.1, 1.5$  Hz 1H), 5.02 (d,  $J = 9.6$  Hz, 1H), 4.61 (d,  $J_{AB} = 11.3$  Hz, 1H), 4.39 (d,  $J_{AB} = 11.3$  Hz, 1H), 3.55 – 3.57 (m, 1H), 3.47 – 3.49 (m, 1H), 2.63 (d,  $J = 1.9$  Hz, 1H), 2.44 – 2.47 (m, 1H), 2.31 – 2.35 (m, 1H), 2.27 – 2.31 (m, 1H), 1.76 – 1.79 (m, 1H), 1.20 (s, 12H), 0.92 (d,  $J = 7.0$  Hz, 3H), 0.86 (d,  $J = 6.8$  Hz, 3H).  $^{13}\text{C NMR}$  (151 MHz,  $\text{CDCl}_3$ )  $\delta$  157.3, 138.5, 134.9, 128.8, 128.1, 128.0, 117.7, 83.43, 83.36, 77.5, 71.8, 44.2, 37.2, 35.7, 25.18, 25.15, 16.6, 7.0. HRMS (ESI $^+$ ):  $m/z$  for  $\text{C}_{24}\text{H}_{37}\text{BO}_4\text{Na}$   $[\text{M}+\text{Na}]^+$  calcd. 423.2683, found: 423.2694.

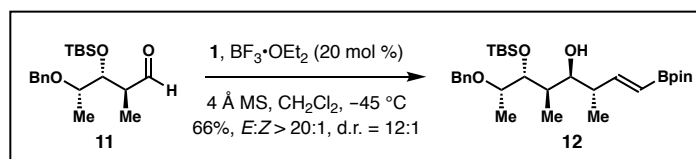

**Synthesis of homoallylic alcohol 12:** Prepared according to the general procedure from aldehyde **11** at  $-45\text{ }^{\circ}\text{C}$  for about 12 h. The crude mixture was purified by flash column chromatography to give compound **12** in 66% yield (34 mg,  $E:Z > 20:1$ ,  $dr = 12:1$ ) as colorless oil.  $[\alpha]_{\text{D}}^{20} = +0.5$  (c 1.3,  $\text{CHCl}_3$ );  $^1\text{H NMR}$  (600 MHz,  $\text{CDCl}_3$ )  $\delta$  7.31 – 7.34 (m, 4H), 7.27 – 7.29 (m, 1H), 6.68 (dd,  $J = 18.0, 7.5$  Hz, 1H), 5.51 (d,  $J = 18.0$  Hz, 1H), 4.58 (d,  $J_{AB} = 11.6$  Hz, 1H), 4.46 (d,  $J_{AB} = 11.6$  Hz, 1H), 3.80 (*app.* d,  $J = 8.8$  Hz, 1H), 3.74 (dd,  $J = 4.9, 4.4$  Hz, 1H), 3.60 – 3.64 (m, 1H), 2.93 (s, 1H), 2.31 – 2.37 (m, 1H), 1.90 – 1.95 (m, 1H), 1.26 (s, 12H), 1.22 (d,  $J = 6.2$  Hz, 3H), 0.93 (d,  $J = 7.2$  Hz, 3H), 0.90 (s, 9H), 0.89 (d,  $J = 7.0$  Hz, 3H), 0.09 (s, 6H).  $^{13}\text{C NMR}$  (126 MHz,  $\text{CDCl}_3$ )  $\delta$  158.0, 138.7, 128.7, 128.1, 127.9, 83.3, 80.6, 76.7, 74.8, 71.1, 43.6, 37.2, 26.5, 25.2, 18.6, 16.6, 16.2, 10.6,  $-3.6, -3.7$ . HRMS (ESI $^+$ ):  $m/z$  for  $\text{C}_{29}\text{H}_{51}\text{BO}_5\text{NaSi}$   $[\text{M}+\text{Na}]^+$  calcd. 541.3497, found: 541.3521.

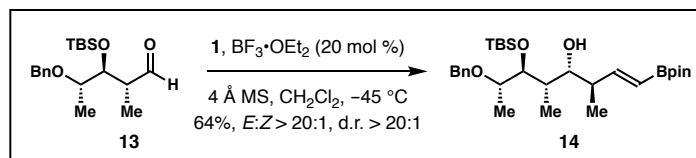

**Synthesis of homoallylic alcohol 14:** Prepared according to the general procedure from aldehyde **13** at  $-45\text{ }^{\circ}\text{C}$  for about 12 h. The crude mixture was purified by flash column chromatography to give compound **14** in 64% yield (33 mg,  $E:Z > 20:1$ ,  $dr > 20:1$ ) as colorless oil.  $[\alpha]_{\text{D}}^{20} = +0.5$  (c 0.70,  $\text{CHCl}_3$ );  $^1\text{H NMR}$  (600 MHz,  $\text{CDCl}_3$ )  $\delta$  7.32 – 7.36 (m, 4H), 7.27 – 7.30 (m, 1H), 6.74 (dd,  $J = 18.1, 7.3$  Hz, 1H), 5.53 (dd,  $J = 18.1, 0.8$  Hz, 1H), 4.59 (d,  $J_{AB} = 11.9$  Hz, 1H), 4.50 (d,  $J_{AB} = 11.9$  Hz, 1H), 3.72 – 3.74 (m, 2H), 3.64 – 3.69 (m, 1H), 3.55 (s, 1H), 2.33 – 2.39 (m, 1H), 1.90 – 1.93 (m, 1H), 1.27 (s, 12H), 1.15 (d,  $J = 6.2$  Hz, 3H), 1.05 (d,  $J = 7.1$  Hz, 3H), 0.93 (d,  $J = 6.9$  Hz, 3H), 0.88 (s, 9H), 0.08 (s, 3H), 0.00 (s, 3H).  $^{13}\text{C NMR}$  (126 MHz,  $\text{CDCl}_3$ )  $\delta$  158.1, 139.2, 128.6, 127.9, 127.7, 83.3, 81.7, 78.4, 74.9, 71.3, 43.3, 35.1, 26.5, 25.2, 18.7, 16.4, 15.9, 11.6,  $-3.7$ ,  $-4.4$ . HRMS (ESI<sup>+</sup>):  $m/z$  for  $\text{C}_{29}\text{H}_{51}\text{BO}_5\text{NaSi}$   $[\text{M}+\text{Na}]^+$  calcd. 541.3497, found: 541.3513.

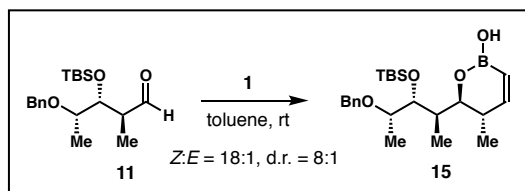

**Synthesis of vinyl boronate 15:** To a solution of aldehyde **11** (34 mg, 0.1 mmol, 1.0 equiv) in toluene (0.3 mL) was added allylic boronate **1** (40 mg, 0.13 mmol, 1.3 equiv). The reaction mixture was kept stirring at ambient temperature ( $\sim 12$  h). After complete consumption of aldehyde **11**,  $\text{Et}_2\text{O}$  (2 mL) was added and the resulting mixture was filtered through a pad of silica gel. The solvent was removed under reduced pressure and the residue was purified by flash column chromatography ( $n$ -hexane/ethyl acetate) to give product **15** (37 mg, 88% yield,  $Z:E = 18:1$ ,  $dr = 8:1$ ).  $[\alpha]_{\text{D}}^{20} = +1.0$  (c 1.25,  $\text{CHCl}_3$ );  $^1\text{H NMR}$  (600 MHz,  $\text{CDCl}_3$ )  $\delta$  7.32 – 7.36 (m, 4H), 7.25 – 7.28 (m, 1H), 6.68 (dd,  $J = 12.0, 1.6$  Hz, 1H), 5.62 (dd,  $J = 12.1, 2.6$  Hz, 1H), 4.55 (d,  $J_{AB} = 12.3$  Hz, 1H), 4.52 (d,  $J_{AB} = 12.2$  Hz, 1H), 4.16 (dd,  $J = 10.7, 1.8$  Hz, 1H), 3.96 (dd,  $J = 9.3, 1.6$  Hz, 1H), 3.81 (s, 1H), 3.61 (qd,  $J = 6.3, 1.6$  Hz, 1H), 2.39 – 2.45 (m, 1H), 1.53 – 1.59 (m, 1H), 1.13 (d,  $J = 6.3$  Hz, 3H), 0.97 (d,  $J = 7.2$  Hz, 3H), 0.87 (s, 9H), 0.78 (d,  $J = 6.9$  Hz, 3H), 0.08 (s, 3H), 0.03 (s, 3H).  $^{13}\text{C NMR}$  (126 MHz,  $\text{CDCl}_3$ )  $\delta$  159.0, 139.4, 128.6, 128.0, 127.6, 78.0, 76.6, 74.6, 70.8, 38.8, 34.7, 26.6, 18.9, 17.7, 13.0, 10.2,  $-3.2$ ,  $-4.7$ . HRMS (ESI<sup>+</sup>):  $m/z$  for  $\text{C}_{23}\text{H}_{39}\text{BO}_4\text{NaSi}$   $[\text{M}+\text{Na}]^+$  calcd. 441.2608, found: 441.2591.

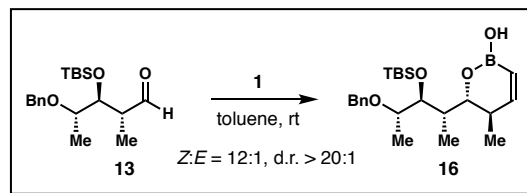

**Synthesis of vinyl boronate 16:** To a solution of aldehyde **13** (34 mg, 0.1 mmol, 1.0 equiv) in toluene (0.3 mL), was added allylic boronate **1** (40 mg, 0.13 mmol, 1.3 equiv). The reaction mixture was kept stirring at ambient temperature (~12 h). After complete consumption of aldehyde **13**, Et<sub>2</sub>O (2 mL) was added and the resulting mixture was filtered through a pad of silica gel. The solvent was removed under reduced pressure and the residue was purified by flash column chromatography (*n*-hexane/ethyl acetate) to give product **16** (33 mg, 79% yield, *Z:E* = 12:1, *dr* > 20:1) as a colorless oil.  $[\alpha]_{\text{D}}^{20} = -1.6$  (c 0.50, CHCl<sub>3</sub>); <sup>1</sup>H NMR (600 MHz, CDCl<sub>3</sub>) δ 7.32 – 7.35 (m, 4H), 7.26 – 7.28 (m, 1H), 6.69 (dd, *J* = 12.1, 1.3 Hz, 1H), 5.61 (dd, *J* = 12.1, 2.7 Hz, 1H), 4.59 (d, *J*<sub>AB</sub> = 12.0 Hz, 1H), 4.57 (d, *J*<sub>AB</sub> = 12.0 Hz, 1H), 4.04 (dd, *J* = 11.0, 1.6 Hz, 1H), 3.90 (dd, *J* = 9.4, 2.9 Hz, 1H), 3.79 (s, 1H), 3.65 (qd, *J* = 6.5, 2.9 Hz, 1H), 2.44 – 2.50 (m, 1H), 1.81 – 1.86 (m, 1H), 1.21 (d, *J* = 6.5 Hz, 3H), 0.98 (d, *J* = 7.2 Hz, 3H), 0.95 (d, *J* = 6.9 Hz, 3H), 0.85 (s, 9H), 0.02 (s, 3H), 0.01 (s, 3H). <sup>13</sup>C NMR (126 MHz, CDCl<sub>3</sub>) δ 159.4, 139.4, 128.6, 127.73, 127.68, 78.5, 78.4, 72.5, 71.1, 37.4, 34.5, 26.3, 18.5, 17.7, 14.1, 9.4, -3.9, -4.2. HRMS (ESI<sup>+</sup>): *m/z* for C<sub>23</sub>H<sub>39</sub>BO<sub>4</sub>NaSi [M+Na]<sup>+</sup> calcd. 441.2608, found: 441.2588.

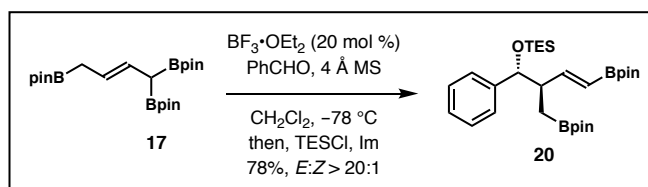

**Triethyl(((1*S*,2*S*,*E*)-1-phenyl-4-(4,4,5,5-tetramethyl-1,3,2-dioxaborolan-2-yl)-2-((4,4,5,5-tetramethyl-1,3,2-dioxaborolan-2-yl)methyl) but-3-en-1-yl)oxy)silane** Prepared according to the general procedure from allylboron reagent **17**.<sup>2</sup> The crude mixture was purified by flash column chromatography to give compound **20** in 78% yield (41 mg, *E:Z* > 20:1) as a colorless oil. <sup>1</sup>H NMR (600 MHz, CDCl<sub>3</sub>) δ 7.25 – 7.29 (m, 4H), 7.20 – 7.23 (m, 1H), 6.65 (dd, *J* = 18.0, 8.2 Hz, 1H), 5.42 (d, *J* = 18.0 Hz, 1H), 4.48 (d, *J* = 6.8 Hz, 1H), 2.63 – 2.68 (m, 1H), 1.26 (s, 12H), 1.18 (s, 6H), 1.17 (s, 6H), 0.83 (t, *J* = 7.9 Hz, 9H), 0.69 – 0.77 (m, 2H), 0.42 – 0.52 (m, 6H). <sup>13</sup>C NMR (151 MHz, CDCl<sub>3</sub>) δ 157.0, 144.1, 127.9, 127.4, 127.2, 83.2, 83.1, 79.5, 50.3, 25.3, 25.04, 24.97, 24.90, 7.2, 5.1. HRMS (ESI<sup>+</sup>): *m/z* for C<sub>29</sub>H<sub>50</sub>B<sub>2</sub>O<sub>5</sub>NaSi [M+Na]<sup>+</sup> calcd. 551.3511, found: 551.3522.

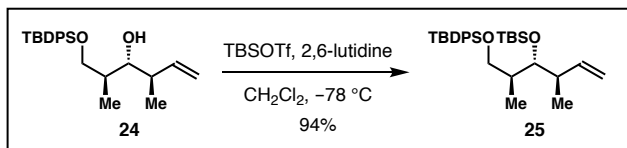

**Synthesis of TBS ether 25:** A 25-mL, pear-shaped flask equipped with a stir bar and rubber septum was charged with alcohol **24**<sup>3</sup> (191 mg, 0.5 mmol, 1.0 equiv) and anhydrous CH<sub>2</sub>Cl<sub>2</sub> (10 mL). The solution was cooled to  $-78\text{ }^{\circ}\text{C}$ , and 2,6-lutidine (134 mg, 1.25 mmol, 2.5 equiv) was added under an argon atmosphere. After stirring for 10 min, TBSOTf (264 mg, 1.0 mmol, 2.0 equiv) was added via a microliter syringe. The reaction mixture was kept stirring at  $-78\text{ }^{\circ}\text{C}$  for 1 h. After complete consumption of alcohol **24**, Et<sub>2</sub>O (5 mL) was added and the resulting mixture was filtered through a pad of silica gel. The solvent was removed under reduced pressure and the residue was purified by flash column chromatography (*n*-hexane/ethyl acetate) to give TBS ether **25** (234 mg, 94% yield) as a colorless oil. <sup>1</sup>H NMR (600 MHz, CDCl<sub>3</sub>)  $\delta$  7.64 – 7.66 (m, 4H), 7.39 – 7.42 (m, 2H), 7.35 – 7.38 (m, 4H), 5.84 – 5.90 (m, 1H), 4.88 – 4.91 (m, 2H), 3.76 (dd,  $J = 10.0, 6.0$  Hz, 1H), 3.55 (dd,  $J = 5.6, 3.3$  Hz, 1H), 3.42 (dd,  $J = 9.9, 7.9$  Hz, 1H), 2.32 – 2.37 (m, 1H), 1.90 – 1.97 (m, 1H), 1.06 (s, 9H), 0.97 (d,  $J = 7.0$  Hz, 3H), 0.90 (d,  $J = 6.9$  Hz, 3H), 0.82 (s, 9H), 0.00 (s, 3H),  $-0.10$  (s, 3H).

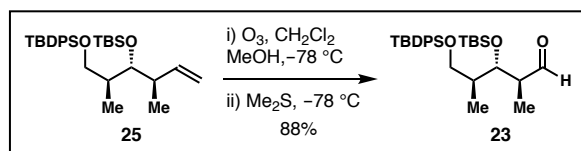

**Synthesis of aldehyde 23:** A stream of ozone in air was bubbled through a solution (initially light red, with Sudan III as the indicator) of TBS ether **25** (149 mg, 0.3 mmol) in dichloromethane (4 mL) and MeOH (1 mL) at  $-78\text{ }^{\circ}\text{C}$  until the light red solution became colorless. The solution was bubbled with nitrogen for 5 min to remove any excess ozone, and then Me<sub>2</sub>S (5 mL) was added at  $-78\text{ }^{\circ}\text{C}$ . The reaction was allowed to warm to ambient temperature and stirred for 5 h. The reaction mixture was filtrated through a pad of Celite. The solution was concentrated under reduced pressure. Purification of the crude product was performed by column chromatography (*n*-hexane/ethyl acetate) to provide aldehyde **23** (132 mg, 88% yield) as a colorless oil. <sup>1</sup>H NMR (600 MHz, CDCl<sub>3</sub>)  $\delta$  9.77 (d,  $J = 2.6$  Hz, 1H), 7.64 – 7.66 (m, 4H), 7.41 – 7.45 (m, 2H), 7.37 – 7.40 (m, 4H), 4.05 (dd,  $J = 4.9, 3.5$  Hz, 1H), 3.68 (dd,  $J = 10.2, 7.3$  Hz, 1H), 3.52 (dd,  $J = 10.3, 6.5$  Hz, 1H), 2.52 – 2.57 (m, 1H), 2.01 – 2.07 (m, 1H), 1.11 (d,  $J = 7.0$  Hz, 3H), 1.07 (s, 9H), 0.87 (d,  $J = 7.0$  Hz, 3H), 0.85 (s, 9H), 0.06 (s, 3H), 0.00 (s, 3H).

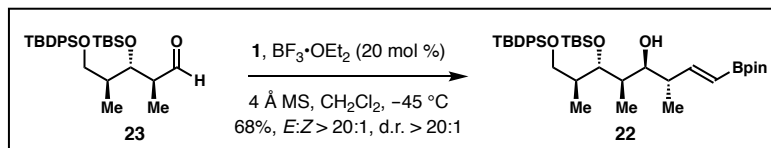

**Synthesis of vinyl boronate 22:** Prepared according to the general procedure from aldehyde **23** at  $-45\text{ }^{\circ}\text{C}$  for about 12 h. The crude mixture was purified by flash column chromatography to give compound **22** in 68% yield (46 mg,  $E:Z > 20:1$ , dr  $> 20:1$ ) as colorless oil.  $^1\text{H}$  NMR (500 MHz,  $\text{CDCl}_3$ )  $\delta$  7.63 – 7.65 (m, 4H), 7.41 – 7.44 (m, 2H), 7.36 – 7.39 (m, 4H), 6.69 (dd,  $J = 18.1, 7.4$  Hz, 1H), 5.50 (d,  $J = 18.1$  Hz, 1H), 3.79 (d,  $J = 9.3$  Hz, 2H), 3.71 (dd,  $J = 9.9, 6.3$  Hz, 1H), 3.45 (dd,  $J = 9.9, 7.4$  Hz, 1H), 3.29 (s, 1H), 2.26 – 2.33 (m, 1H), 2.07 – 2.15 (m, 1H), 1.81 – 1.85 (m, 1H), 1.25 (s, 12H), 1.06 (s, 9H), 0.97 (d,  $J = 7.1$  Hz, 3H), 0.93 (d,  $J = 7.0$  Hz, 3H), 0.85 (d,  $J = 6.9$  Hz, 3H), 0.81 (s, 9H), 0.06 (s, 3H),  $-0.07$  (s, 3H).  $^{13}\text{C}$  NMR (126 MHz,  $\text{CDCl}_3$ )  $\delta$  158.3, 136.0 (two overlapping carbon signals), 134.1, 134.0, 130.02, 129.96, 128.02, 127.99, 83.3, 80.3, 74.9, 66.7, 43.4, 41.0, 35.0, 27.3, 26.5, 25.21, 25.18, 19.6, 18.5, 16.6, 13.9, 12.3,  $-3.5$ ,  $-4.0$ . HRMS (ESI $^+$ ):  $m/z$  for  $\text{C}_{39}\text{H}_{66}\text{BO}_5\text{Si}_2$   $[\text{M}+\text{H}]^+$  calcd. 681.4542, found: 681.4532.

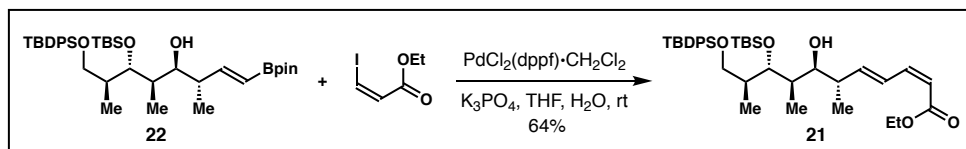

**Synthesis of compound 21:** In an Ar-filled glove box,  $\text{PdCl}_2(\text{dppf})\cdot\text{CH}_2\text{Cl}_2$  (4 mg, 0.005 mmol, 10 mol %),  $\text{K}_3\text{PO}_4$  (28 mg, 0.13 mmol, 2.6 equiv), THF (0.5 mL), vinylboronate **22** (34 mg, 0.05 mmol, 1.0 equiv), and a Teflon-coated magnetic stirring bar were sequentially added into a 1-dram vial. The vial was sealed with a rubber septum and removed from the glove box. Then vinyl iodide (16 mg, 0.07 mmol, 1.4 equiv) and 50  $\mu\text{L}$   $\text{H}_2\text{O}$  were added to the mixture under argon. The reaction was kept stirring at ambient temperature for 48 h. After complete consumption of boronate **22**,  $\text{Et}_2\text{O}$  (2 mL) was added and the resulting mixture was filtered through a short pad of Celite. Brine (5 mL) and  $\text{Et}_2\text{O}$  (1 mL) were added to the filtrate, the organic layer was separated, and the aqueous layer was extracted with  $\text{Et}_2\text{O}$  (3 x 1 mL). The combined organic layers were dried over anhydrous magnesium sulfate, filtered, and concentrated under reduced pressure. Purification of the crude product was performed by flash chromatography to provide product **21** in 64% yield (21 mg) as colorless oil.  $[\alpha]_{\text{D}}^{20} = -2.9$  (c 1.15,  $\text{CHCl}_3$ );  $^1\text{H}$  NMR (600 MHz,  $\text{CDCl}_3$ )  $\delta$  7.63 – 7.65 (m, 4H), 7.40 – 7.44 (m, 3H), 7.35 – 7.39 (m, 4H), 6.59 (dd,  $J = 11.8, 11.3$  Hz, 1H), 6.22 (dd,  $J = 15.5, 7.4$  Hz, 1H), 5.56 (d,  $J = 11.4$

Hz, 1H), 4.18 (q,  $J = 7.1$  Hz, 2H), 3.81 (dd,  $J = 6.8, 2.5$  Hz, 1H), 3.76 (dd,  $J = 9.2, 1.2$  Hz, 1H), 3.72 (dd,  $J = 10.0, 6.4$  Hz, 1H), 3.45 – 3.48 (m, 2H), 2.38 – 2.44 (m, 1H), 2.09 – 2.16 (m, 1H), 1.84 – 1.88 (m, 1H), 1.29 (t,  $J = 7.1$  Hz, 3H), 1.06 (s, 9H), 0.99 (d,  $J = 7.1$  Hz, 3H), 0.95 (d,  $J = 7.0$  Hz, 3H), 0.92 (d,  $J = 6.8$  Hz, 3H), 0.82 (s, 9H), 0.07 (s, 3H), – 0.06 (s, 3H).  $^{13}\text{C}$  NMR (126 MHz,  $\text{CDCl}_3$ )  $\delta$  167.0, 149.3, 145.9, 136.0 (two overlapping carbon signals), 134.01, 133.99, 130.04, 130.00, 128.02, 128.00, 126.6, 116.1, 80.5, 75.7, 66.7, 60.1, 41.0, 40.8, 35.0, 27.3, 26.4, 19.6, 18.5, 16.4, 14.7, 13.9, 12.4, –3.5, –4.0. HRMS (ESI<sup>+</sup>):  $m/z$  for  $\text{C}_{38}\text{H}_{61}\text{O}_5\text{Si}_2$   $[\text{M}+\text{H}]^+$  calcd. 653.4058, found: 653.4080.

#### Assignment of the absolute configuration of **10** using Mosher ester analysis:<sup>4</sup>

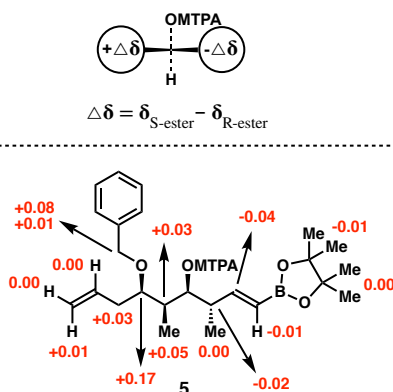

#### Reference:

1. Reagent **1** was prepared according to the reported procedure: Park, J.; Choi, S.; Lee, Y.; Cho, S. H. *Org. Lett.* **2017**, *19*, 4054.
2. Reagent **17** was prepared according to the reported procedure: Chen, J.; Chen, M. *Org. Lett.* **2020**, *22*, 7321.
3. Alcohol **24** was prepared according to the reported procedures: (a) Hale, K. J.; Dimopoulos, P.; Cheung, M. L. F.; Frigerio, M.; Steed, J. W.; Levett, P. C. *Org. Lett.* **2002**, *4*, 897. (b) Pasqua, A. E.; Ferrari, F. D.; Hamman, C.; Liu, Y.; Crawford, J. J.; Marquez, R. *J. Org. Chem.* **2012**, *77*, 6989. (c) Tokairin, Y.; Konno, H. *Tetrahedron* **2017**, *73*, 39.
4. (a) Dale, J. A.; Mosher, H. S. *J. Am. Chem. Soc.* **1973**, *95*, 512. (b) Ohtani, I.; Kusumi, T.; Kashman, Y.; Kakisawa, H. *J. Am. Chem. Soc.* **1991**, *113*, 4092. (c) Hoye, T. R.; Jeffrey, C. S.; Shao, F. *Nat. Protoc.* **2007**, *2*, 2451.

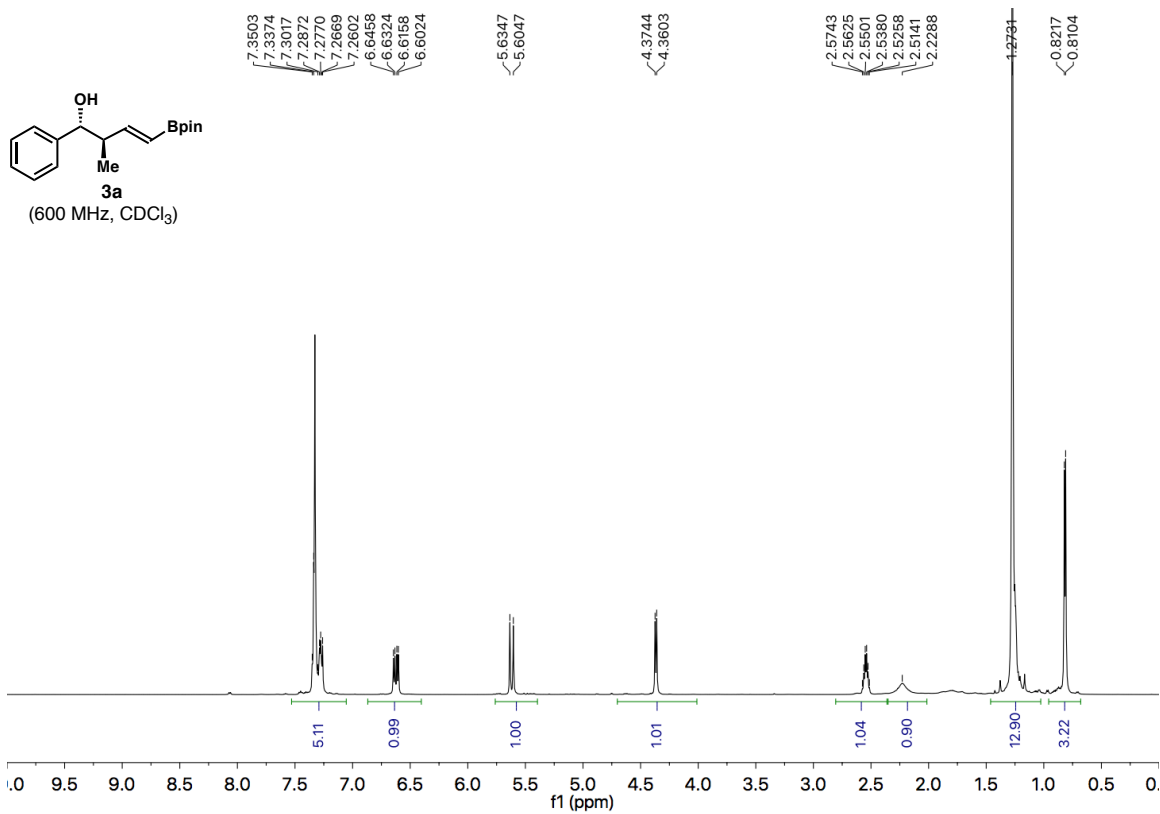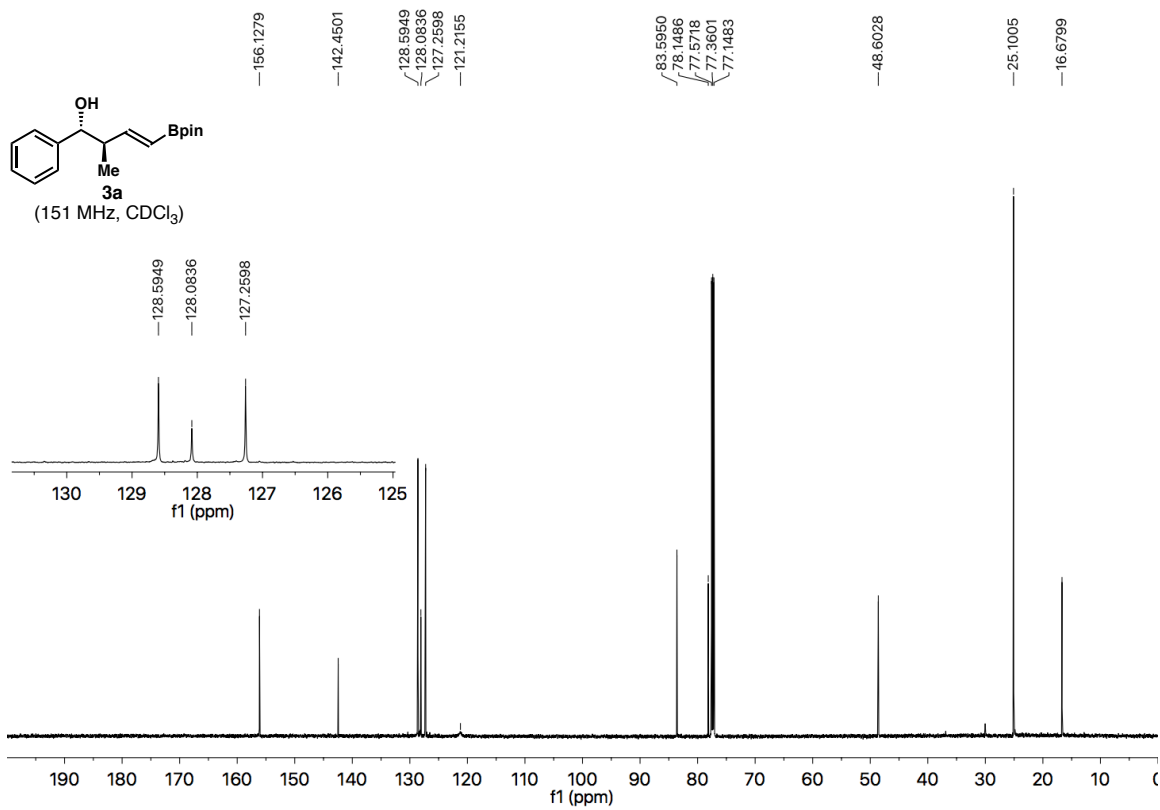



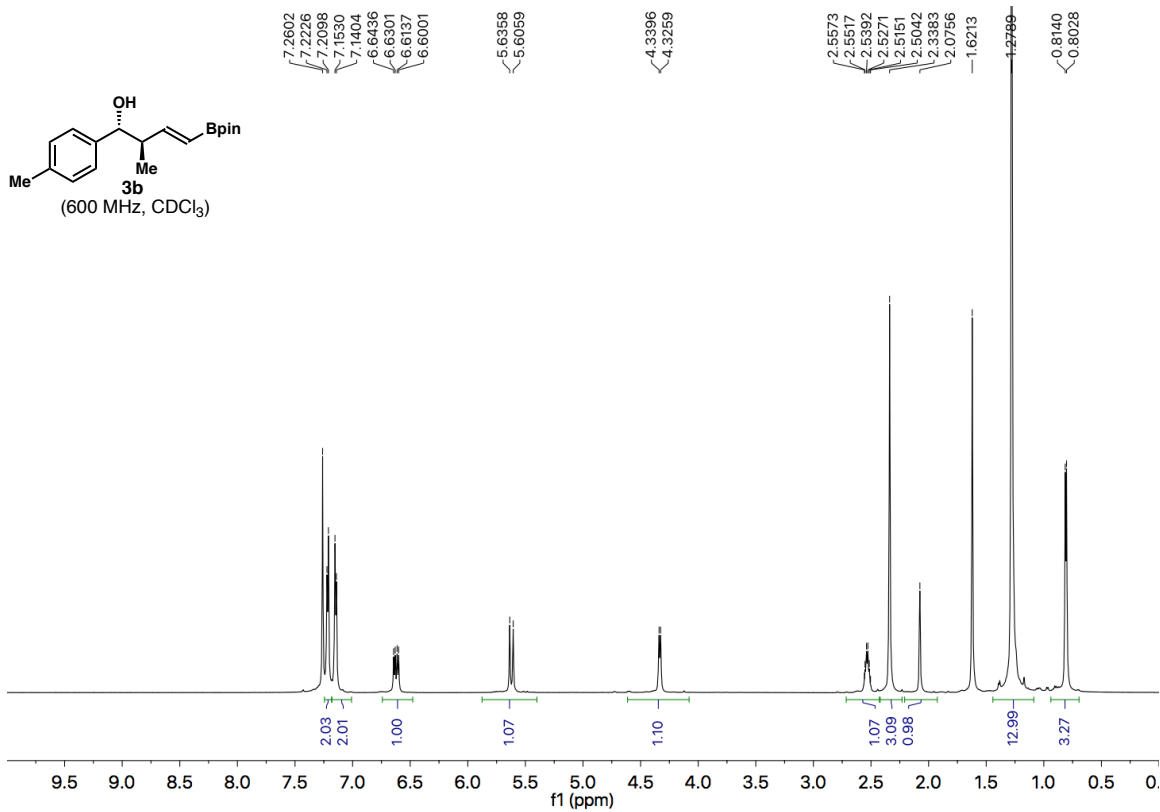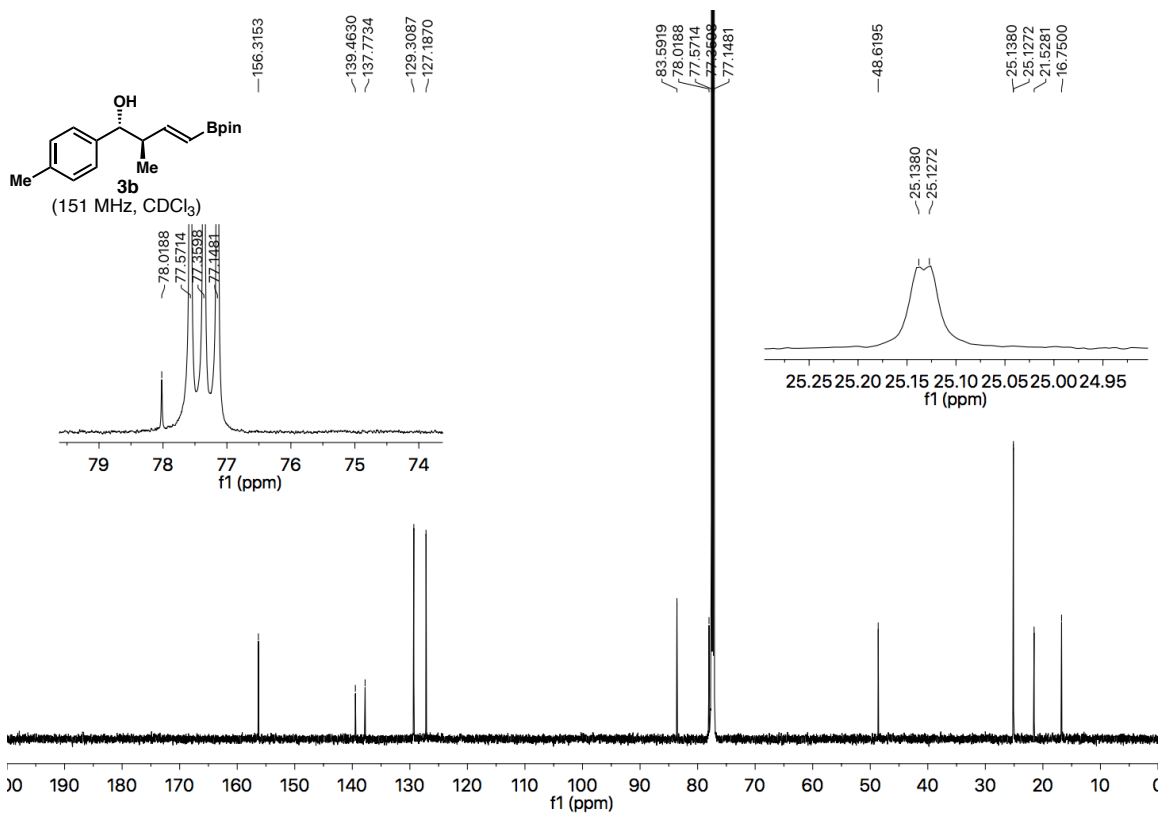

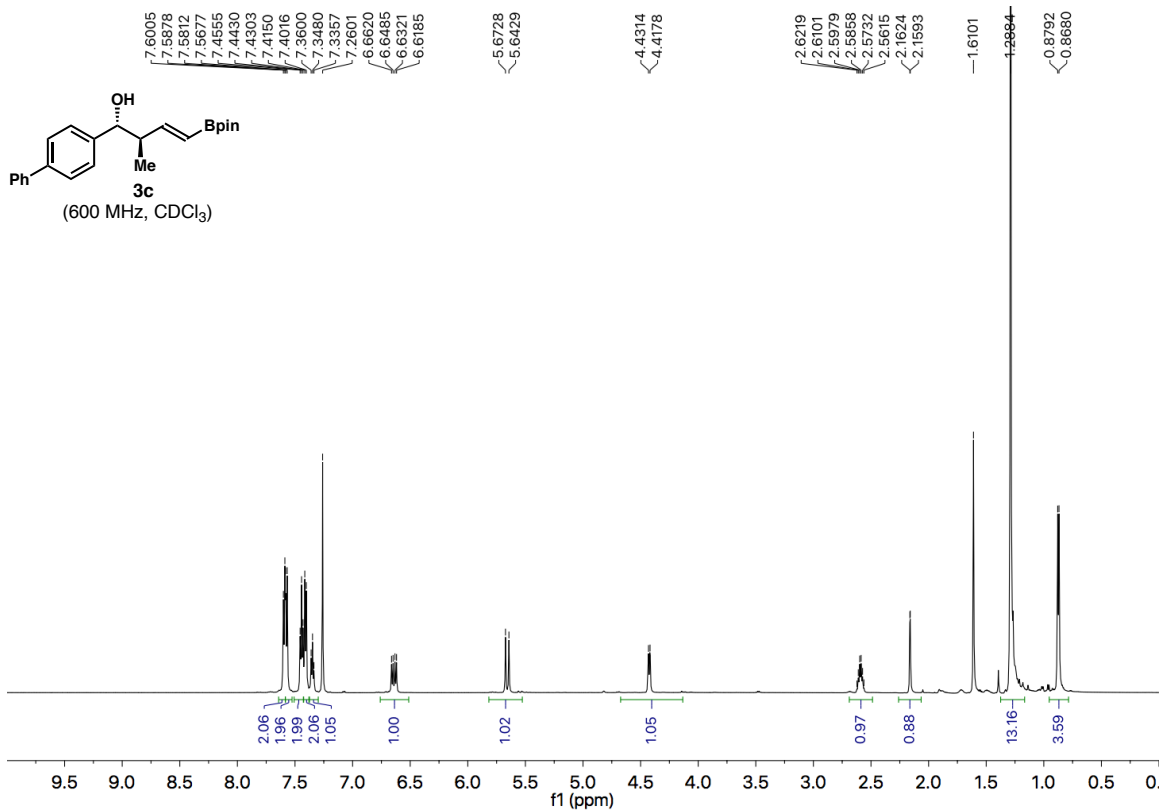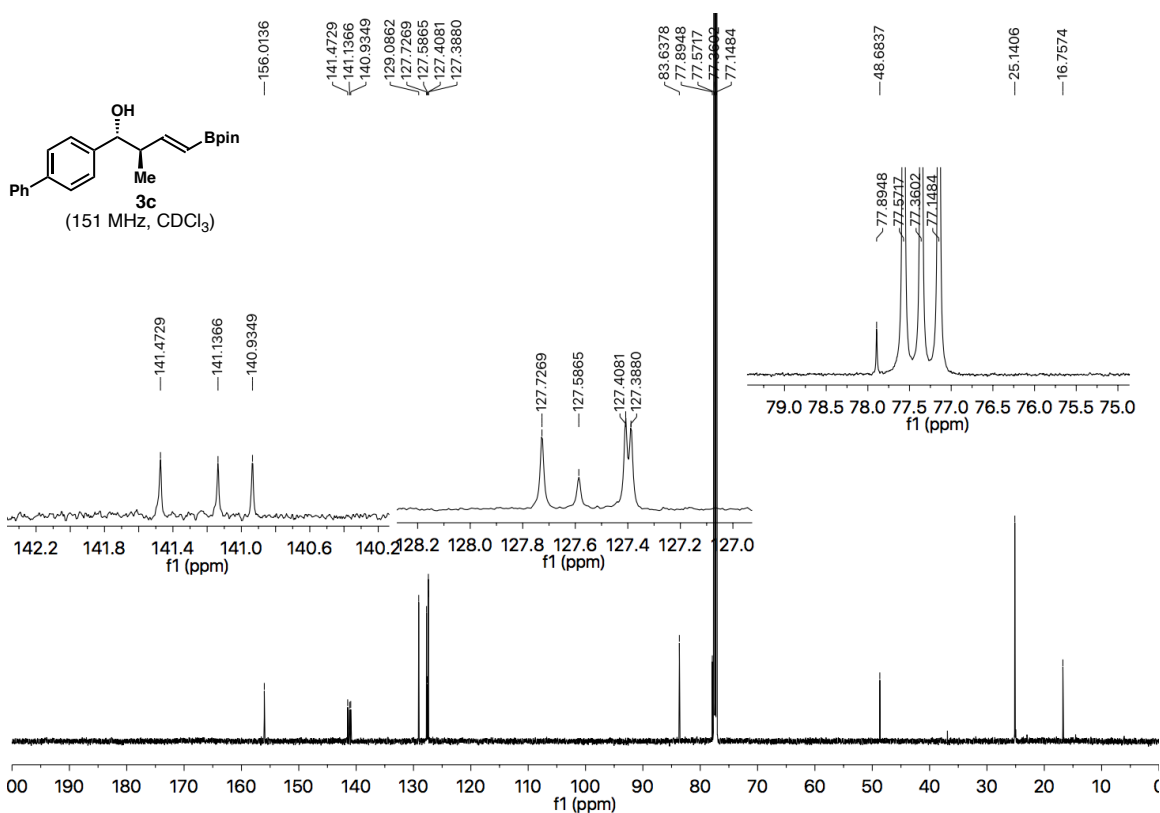

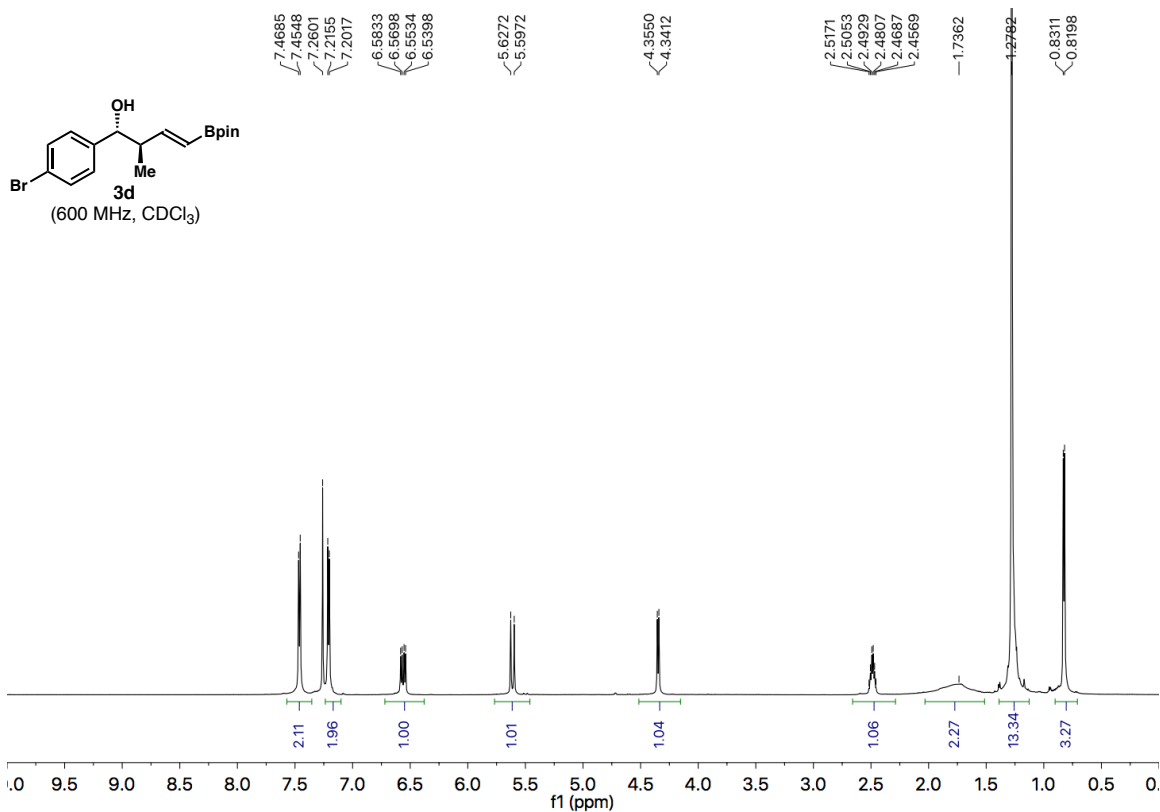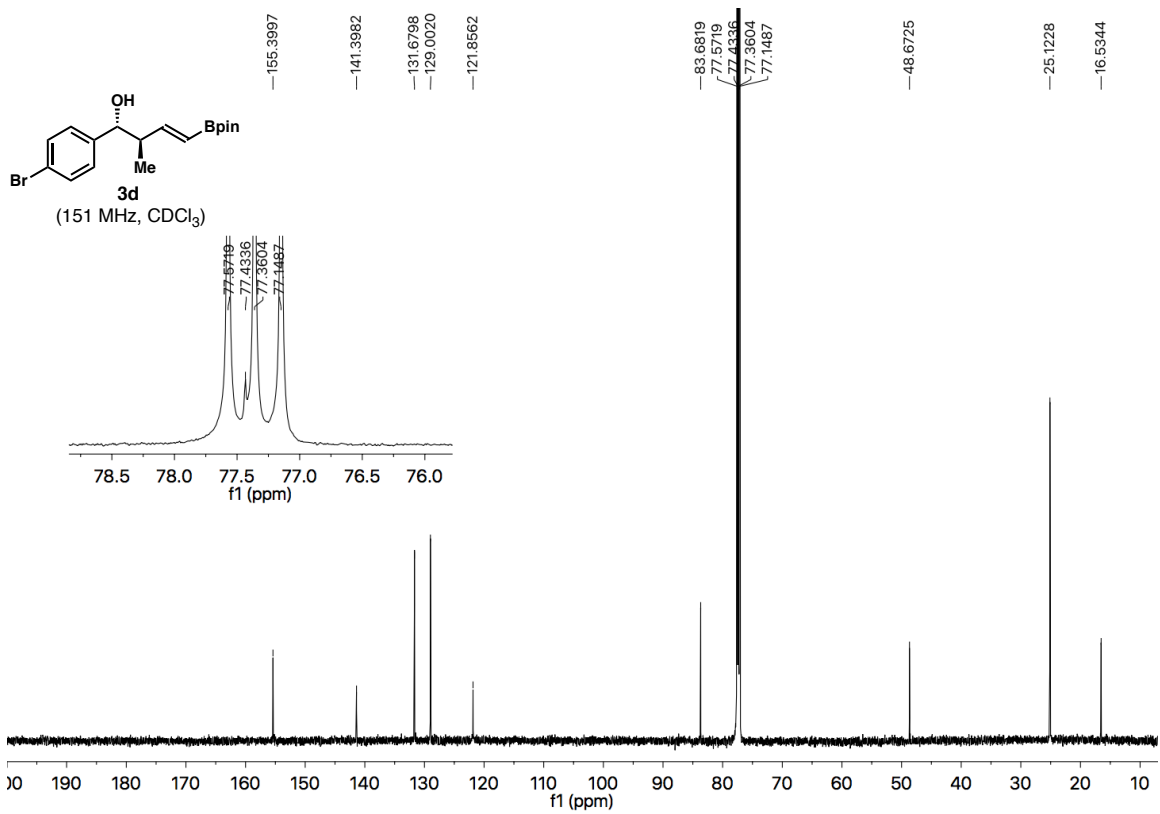

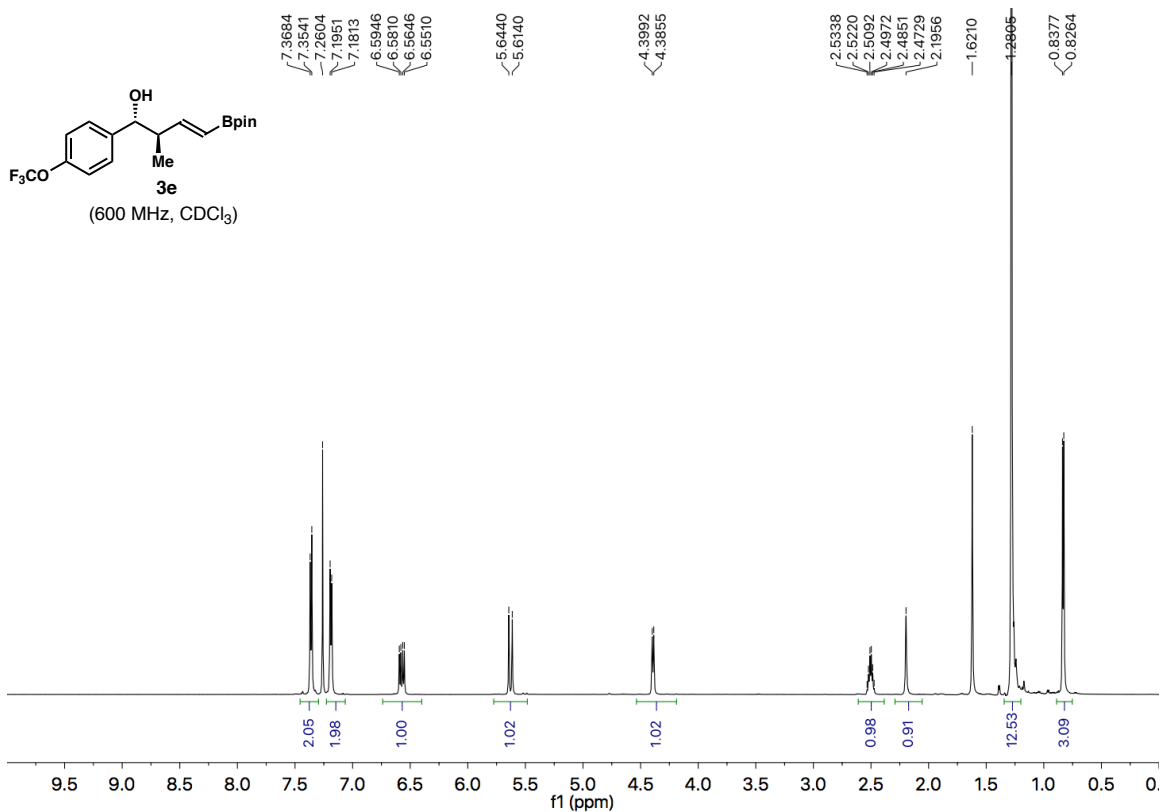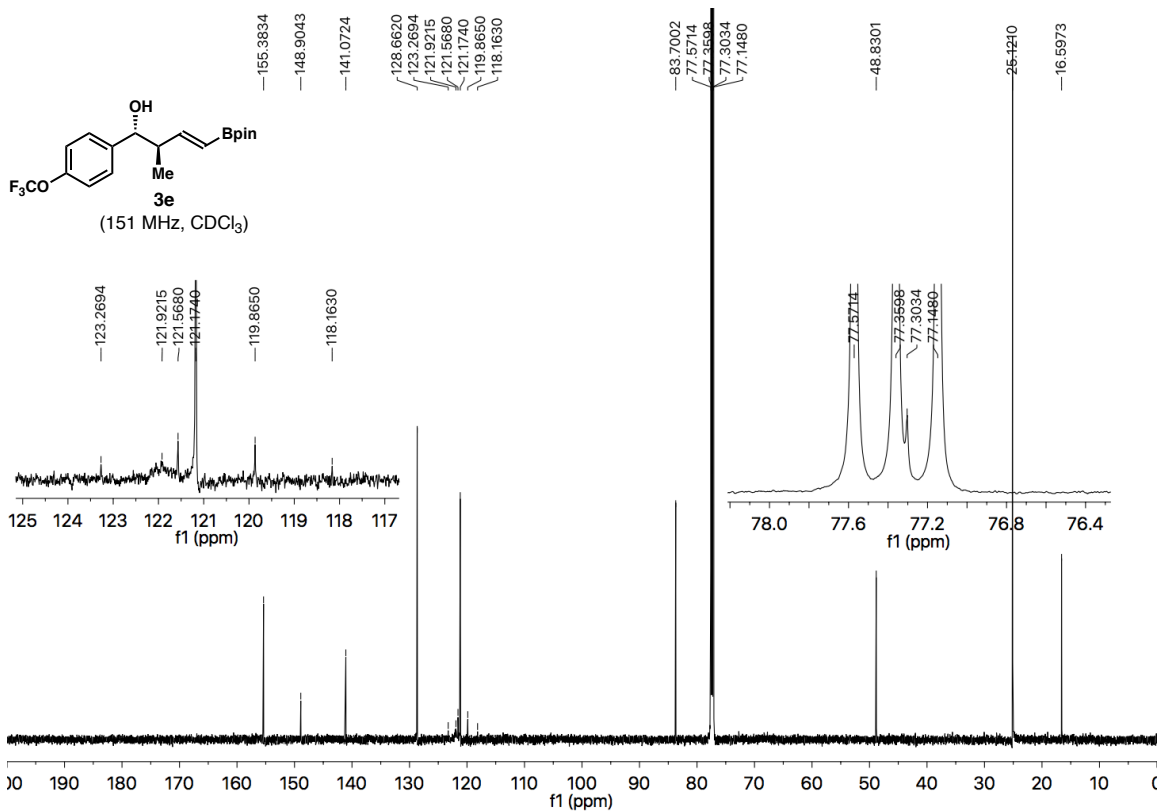

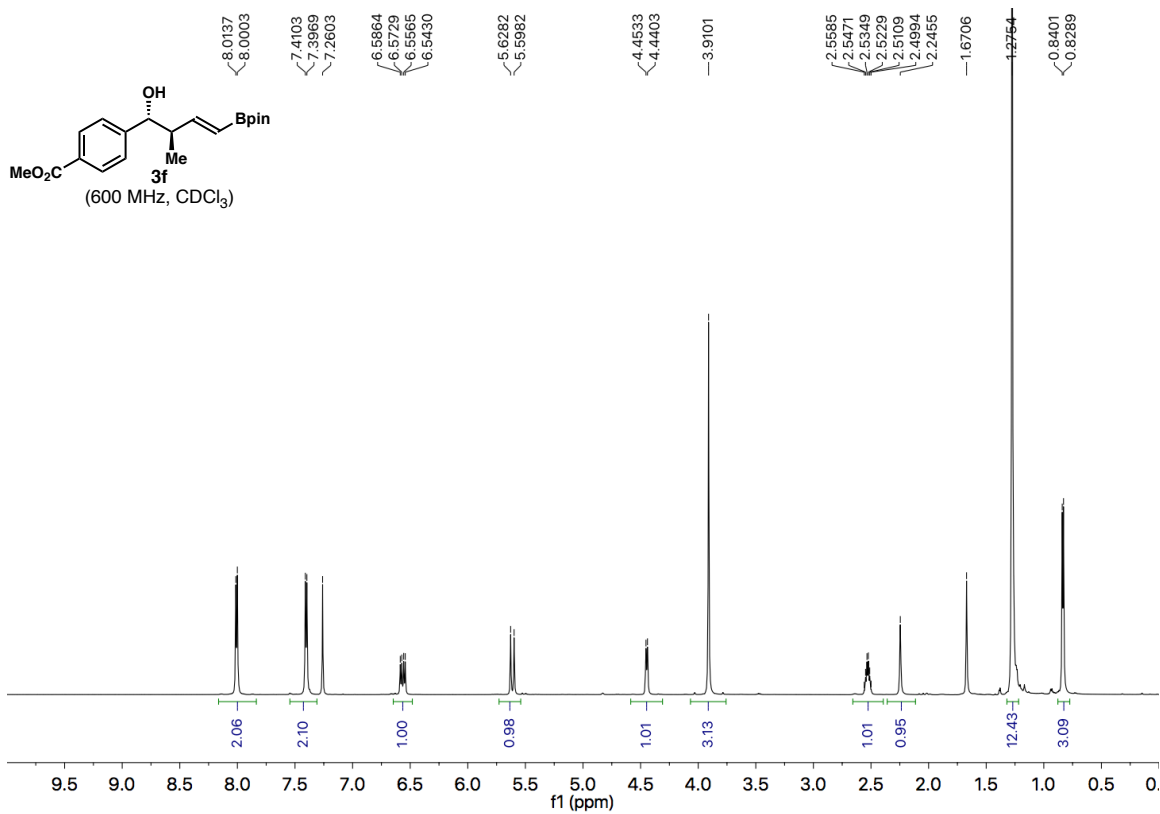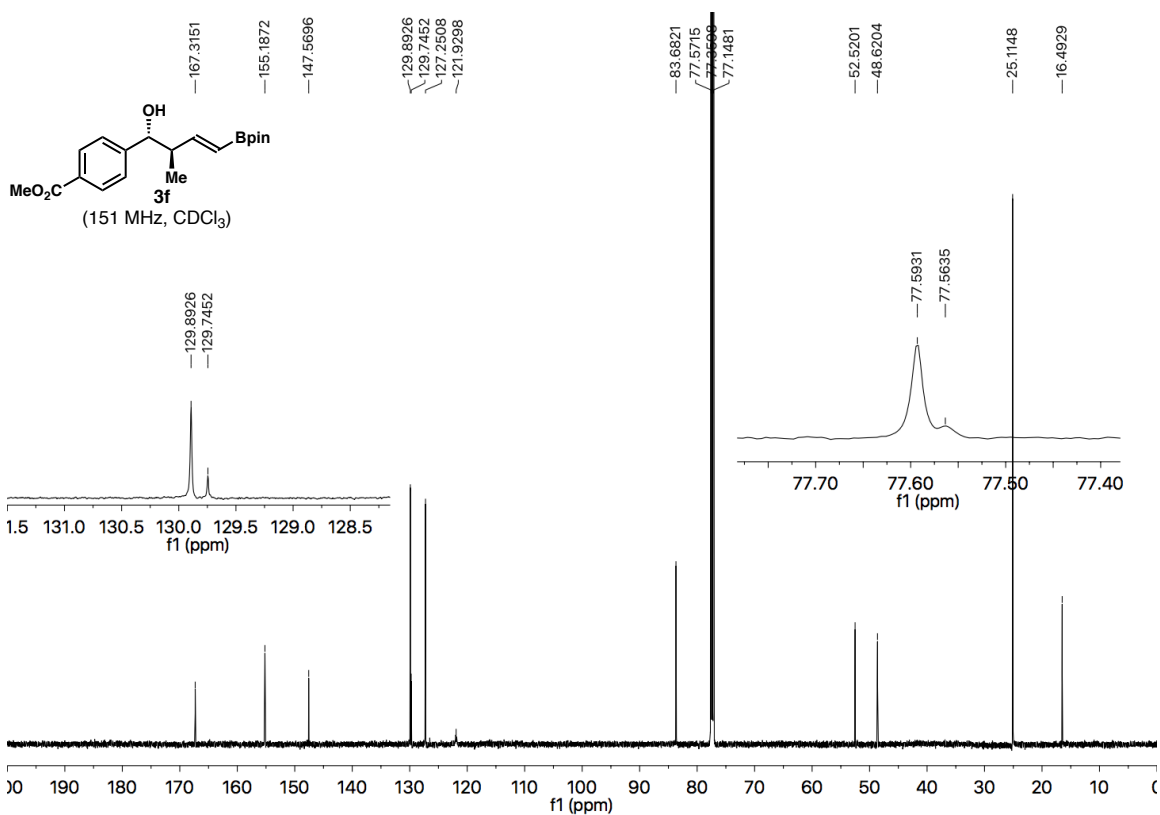

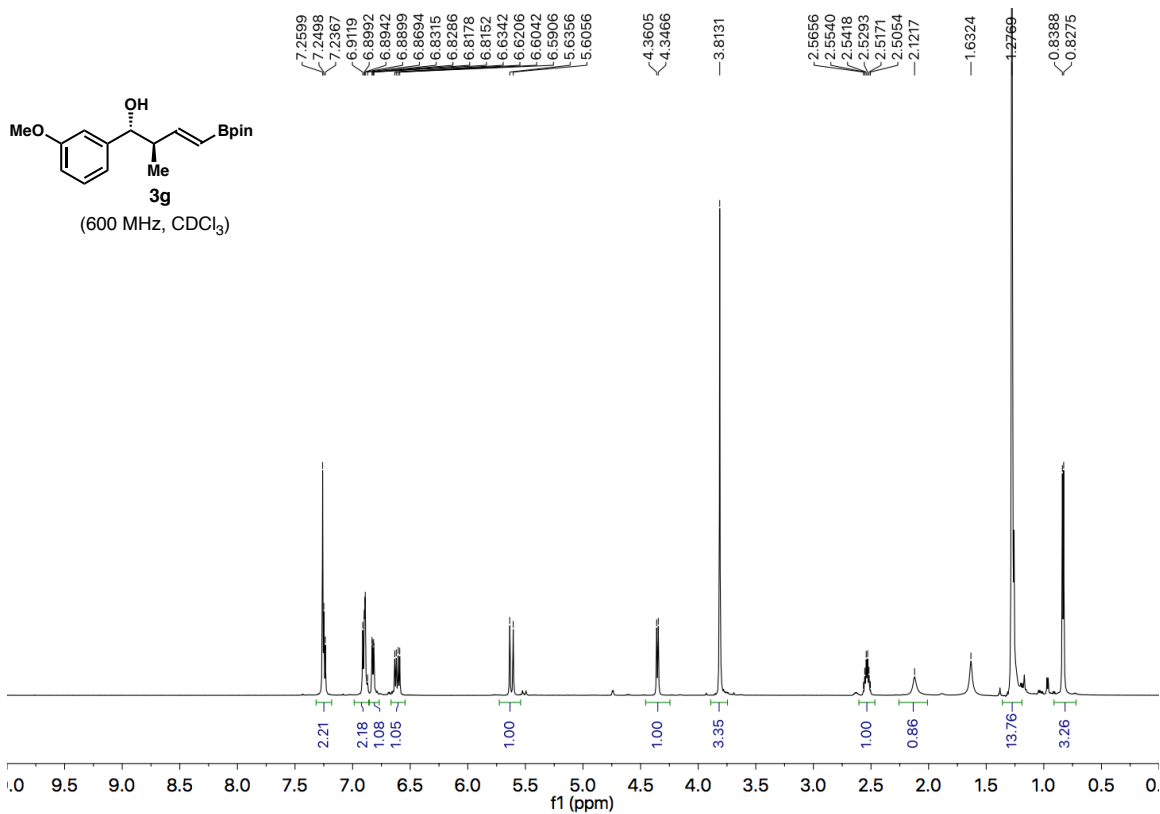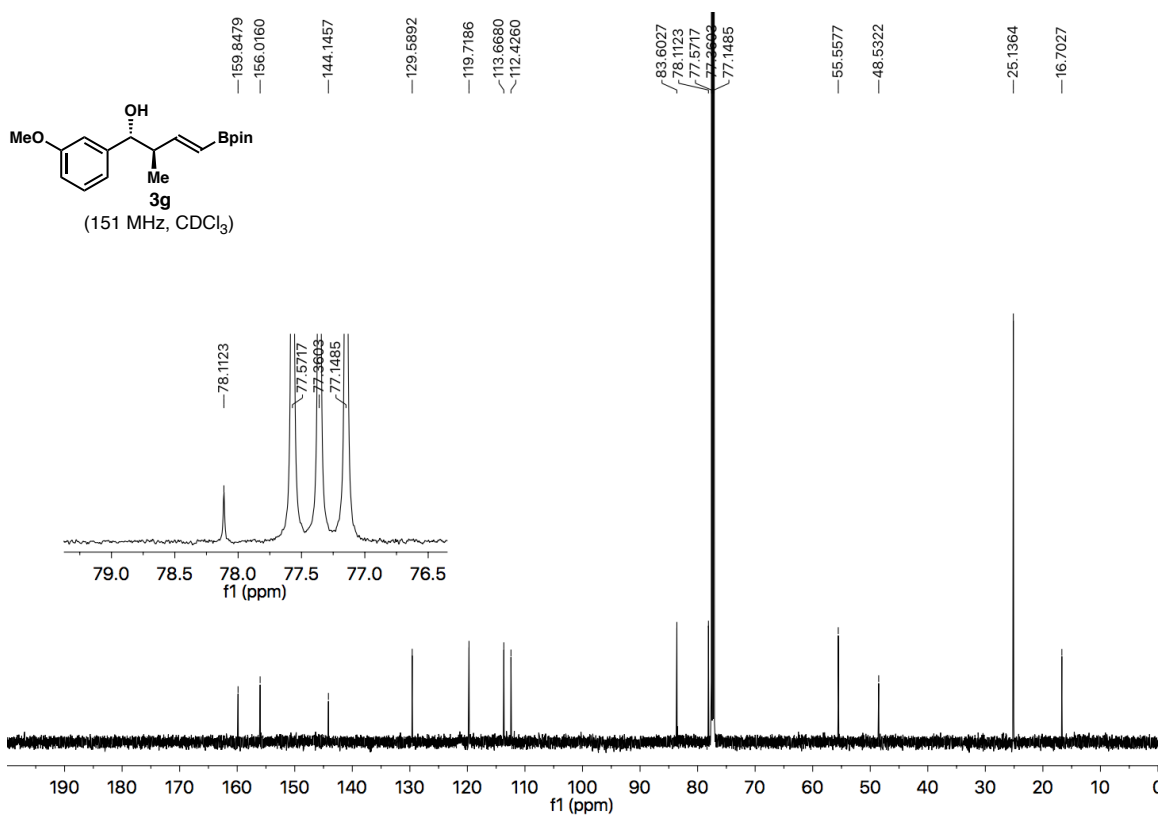

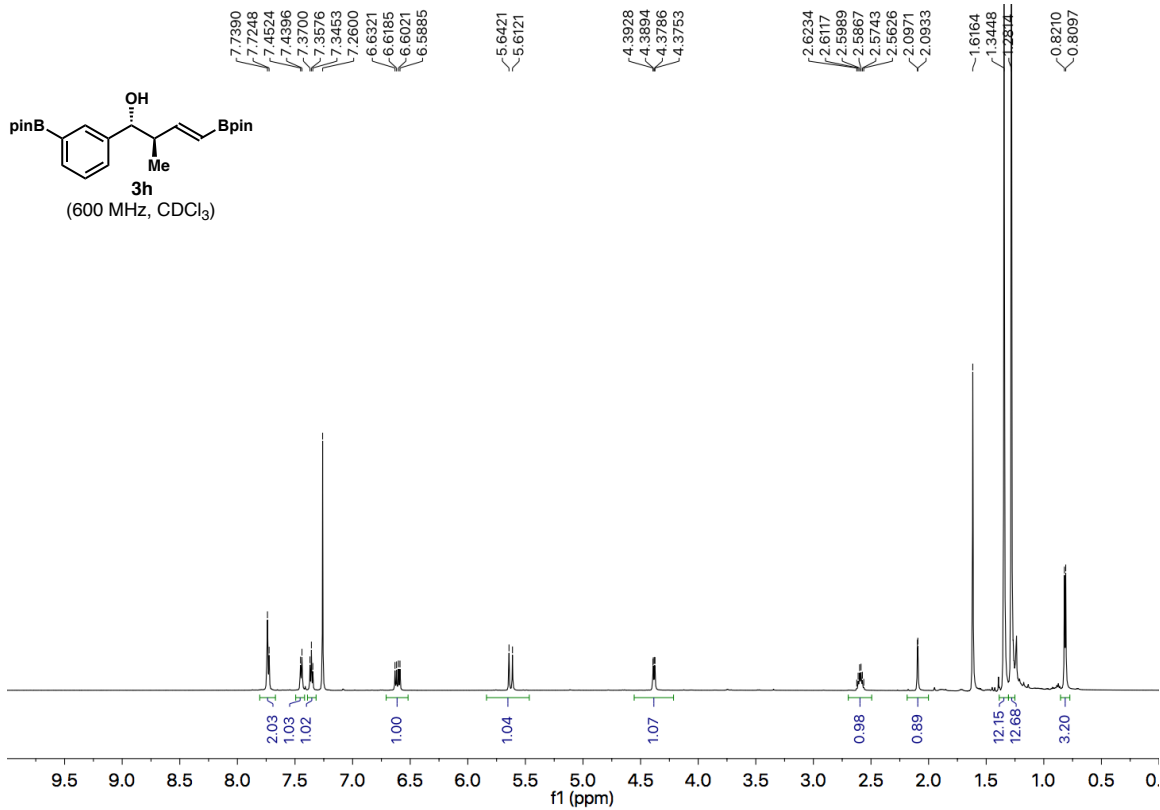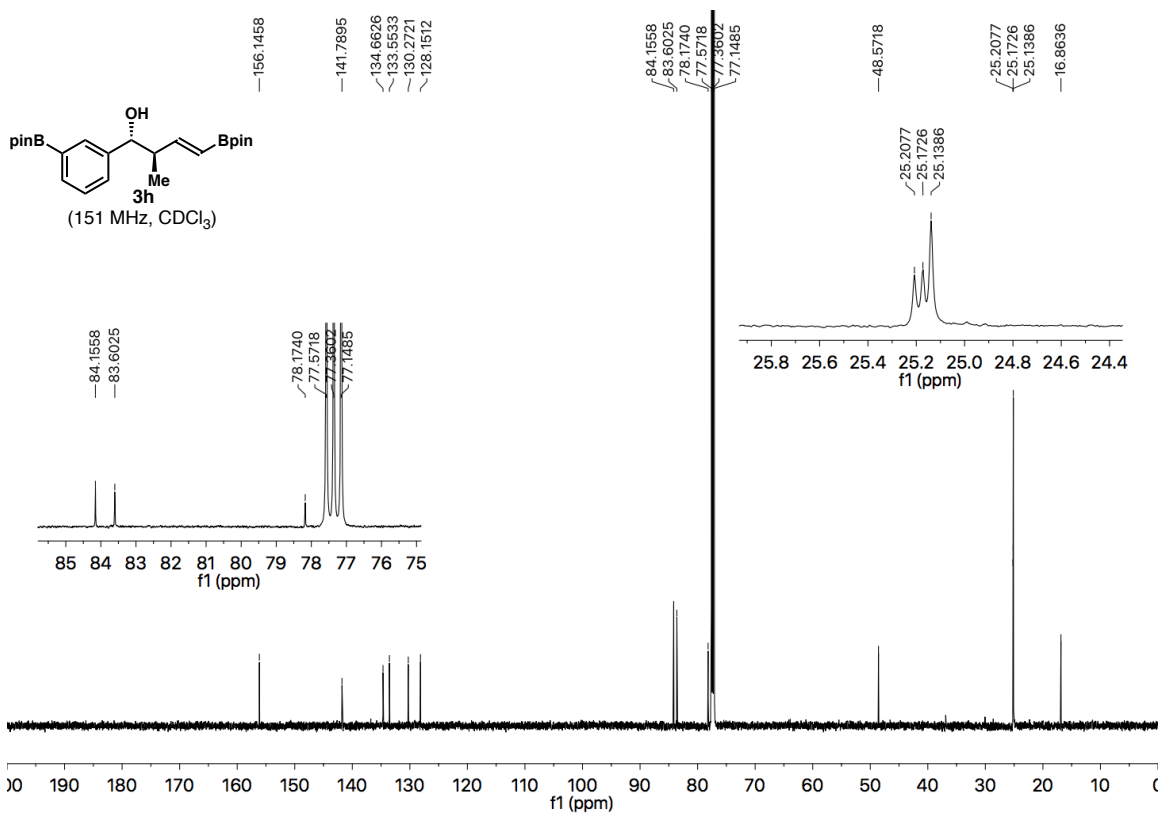

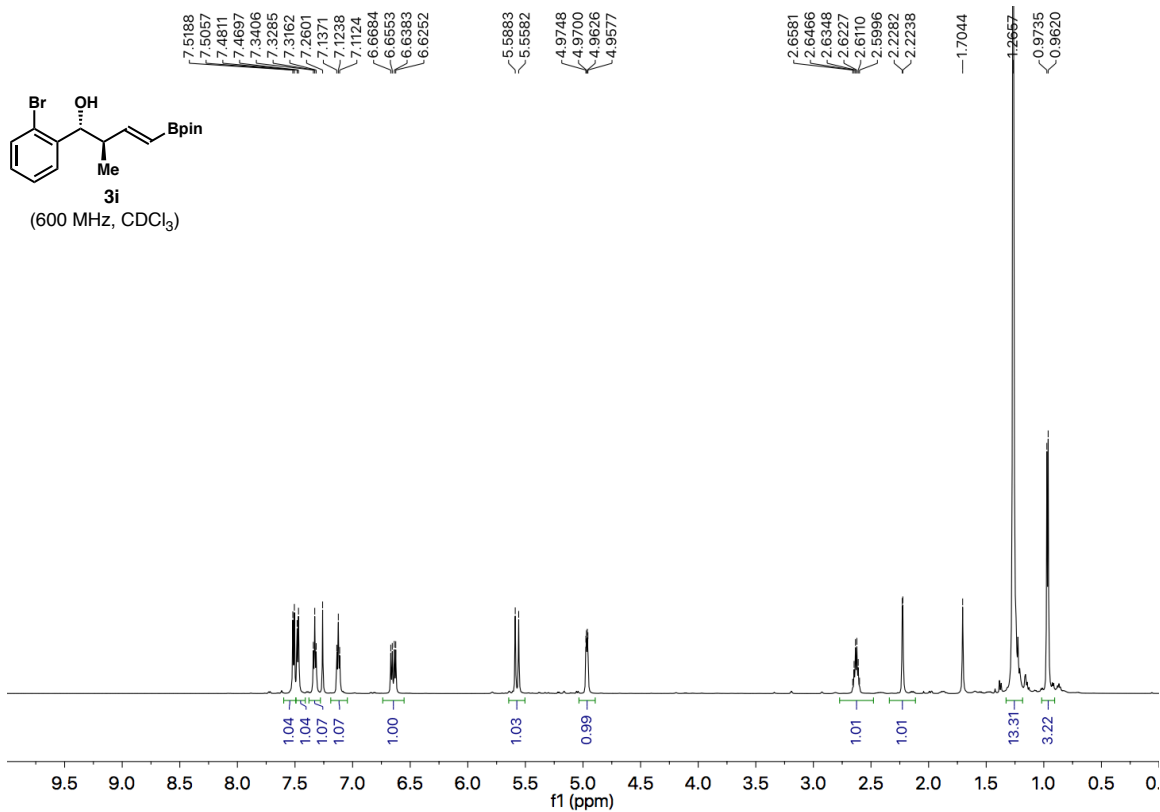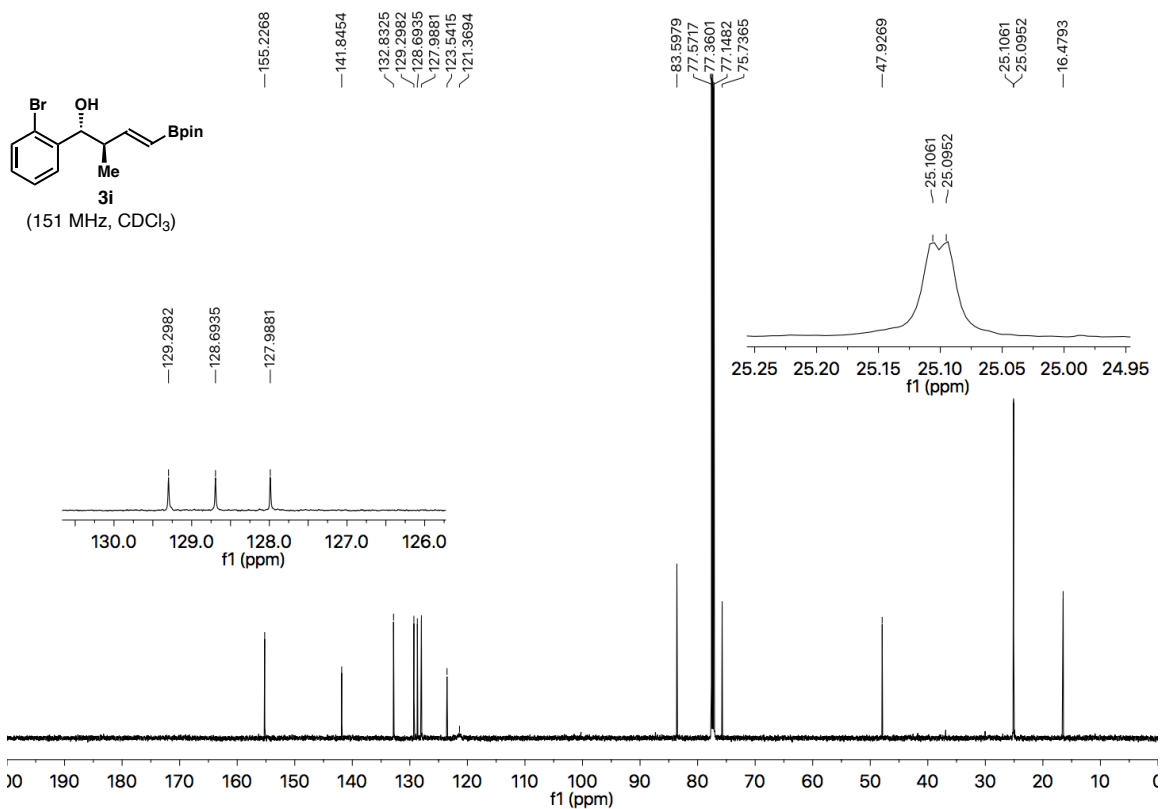



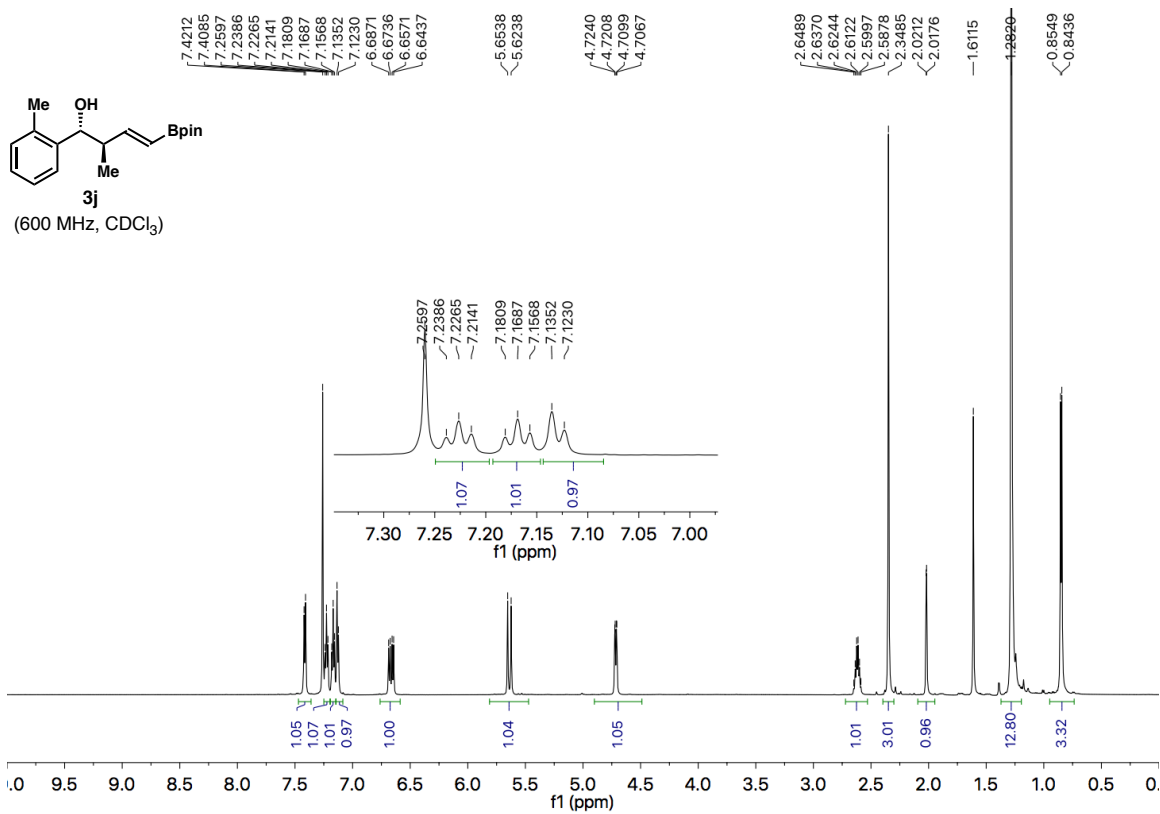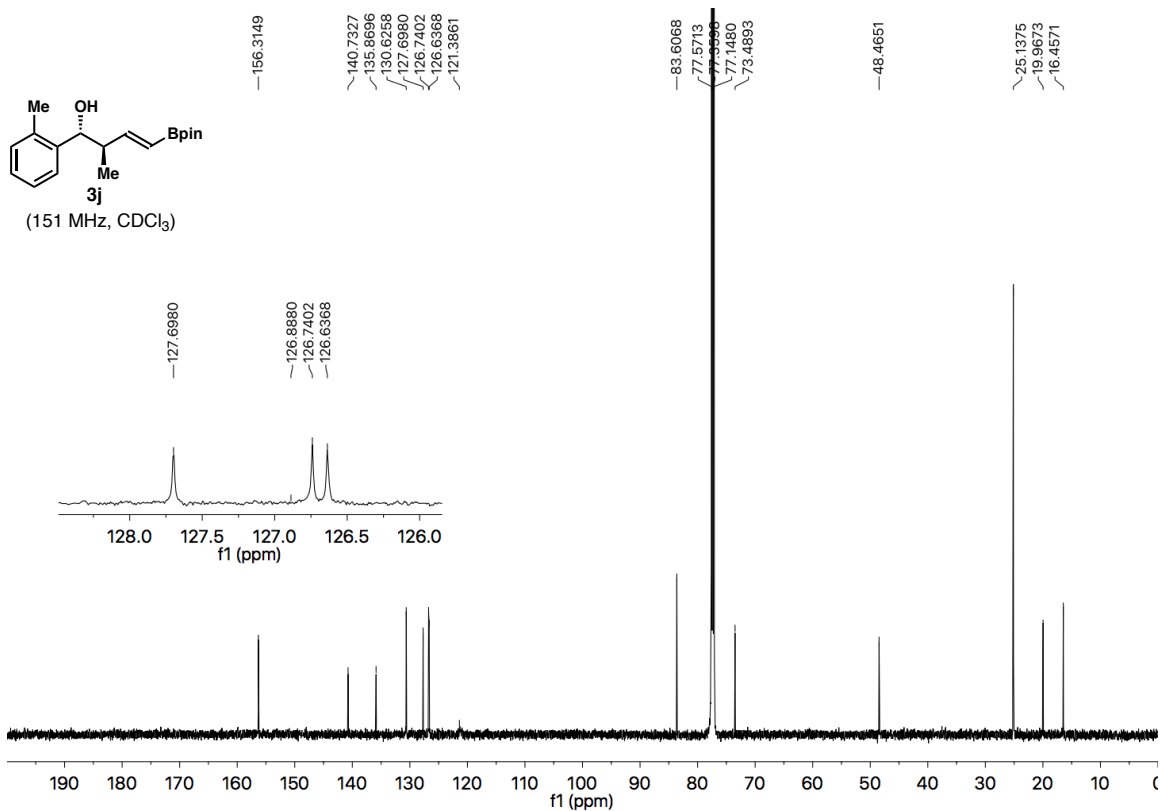

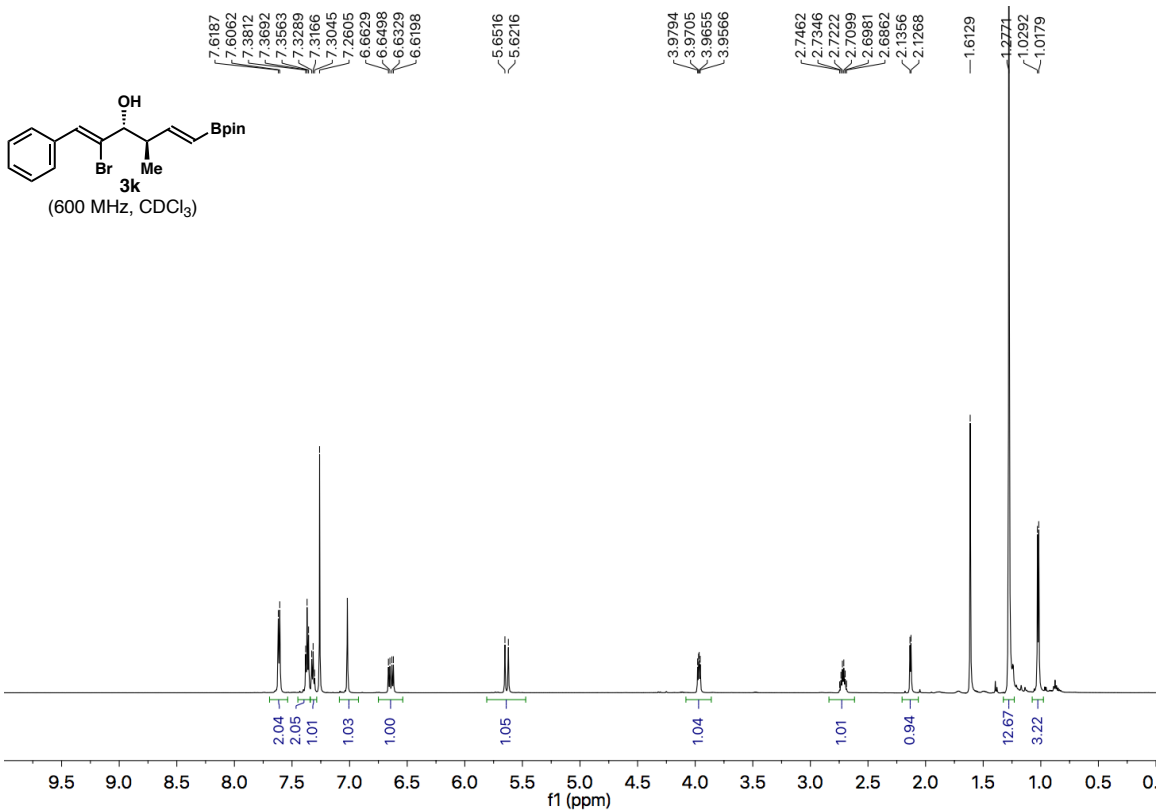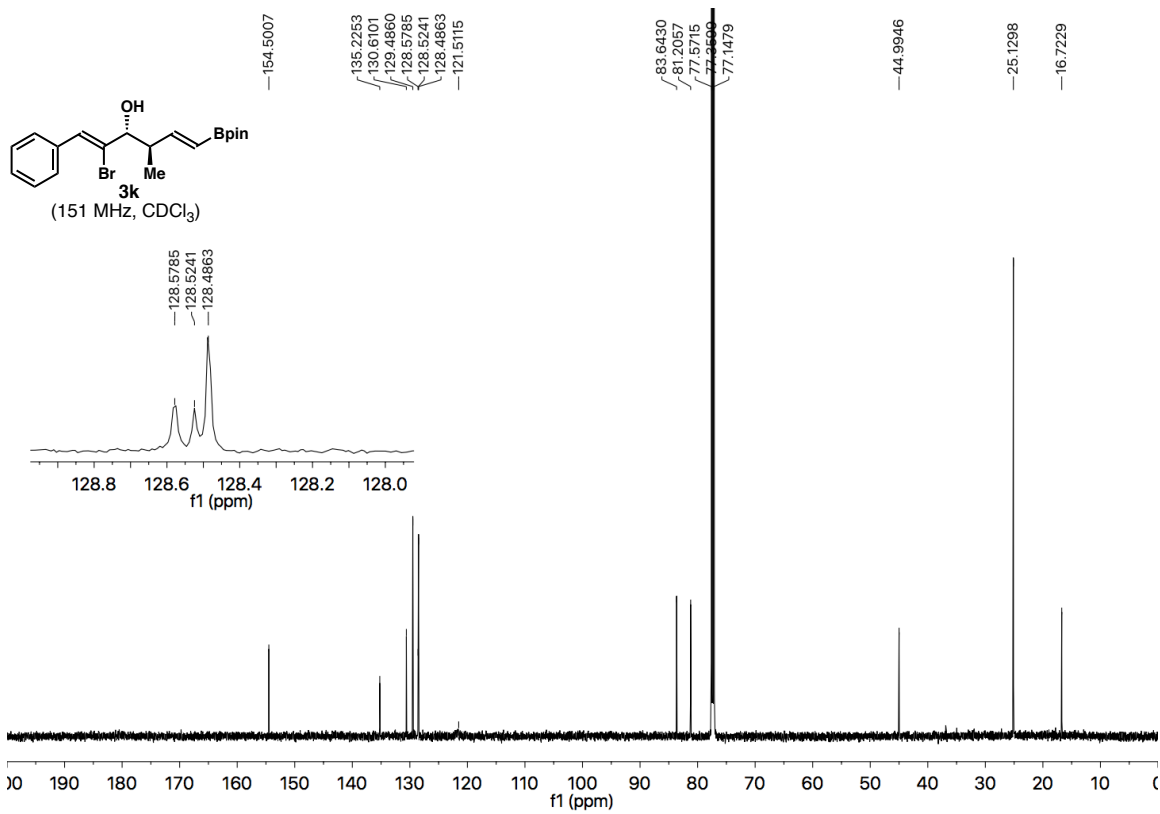

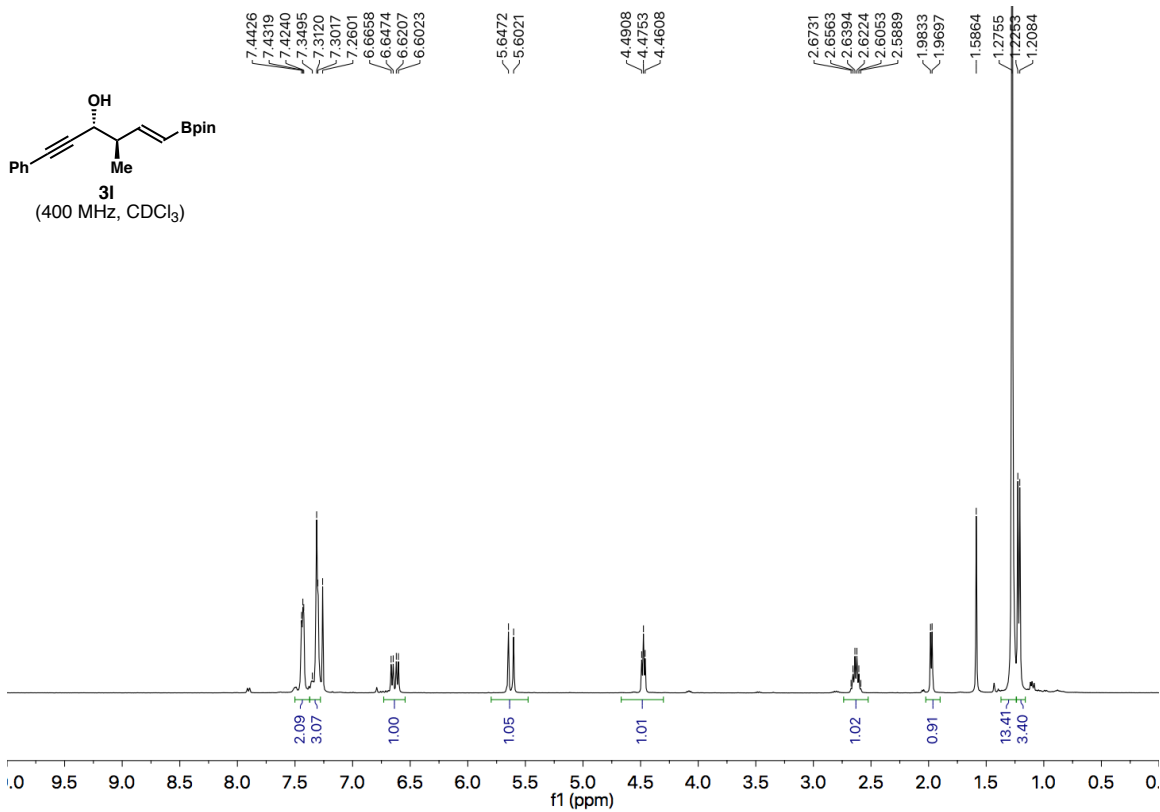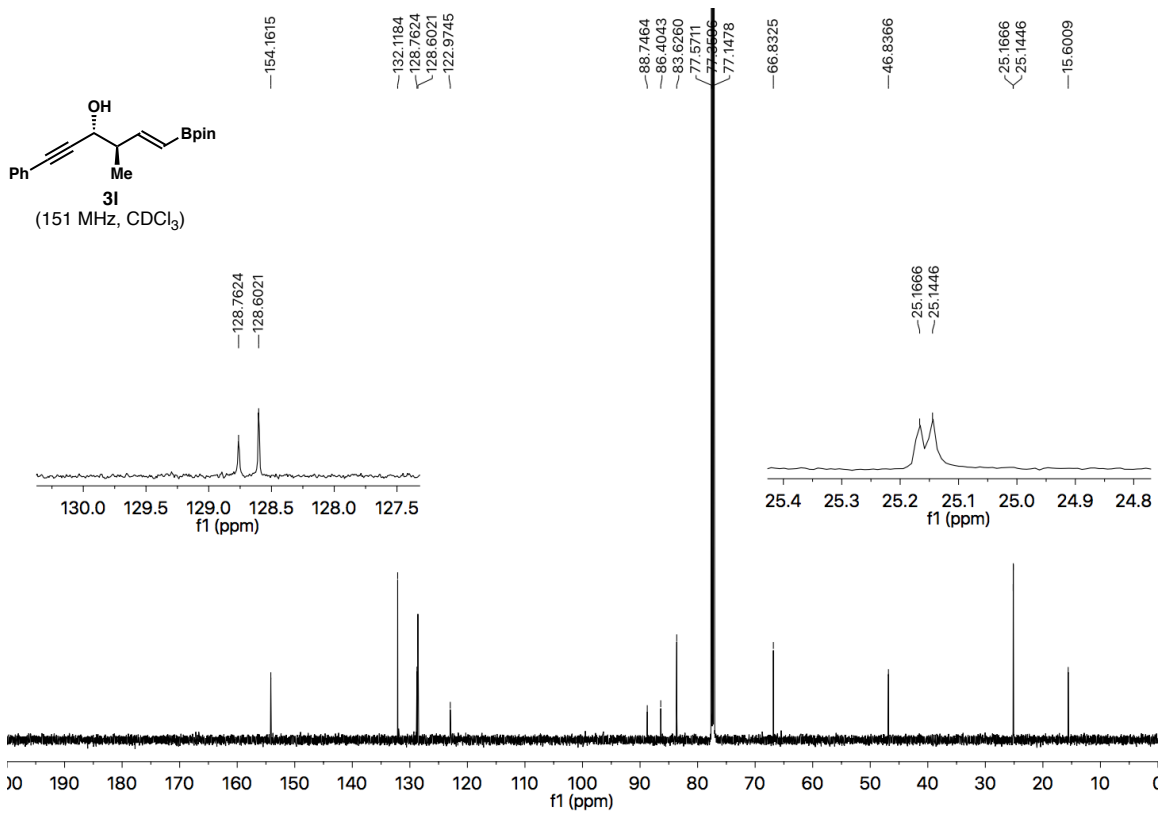

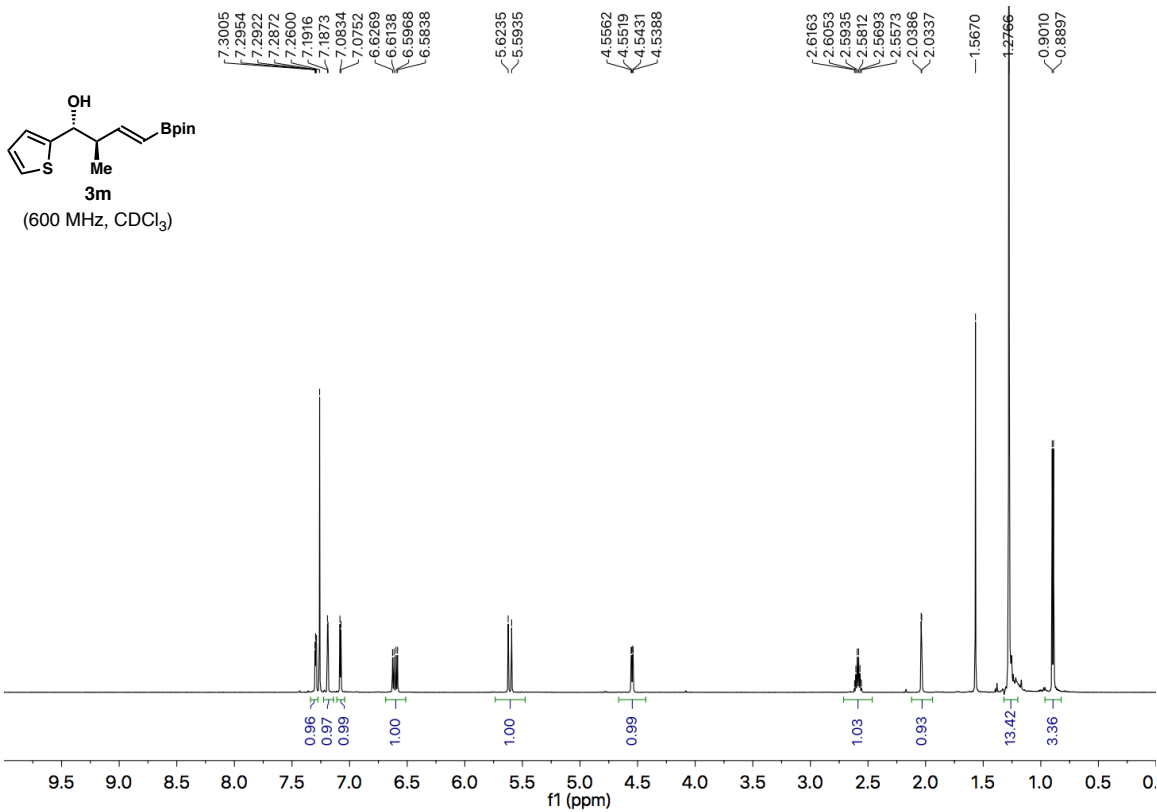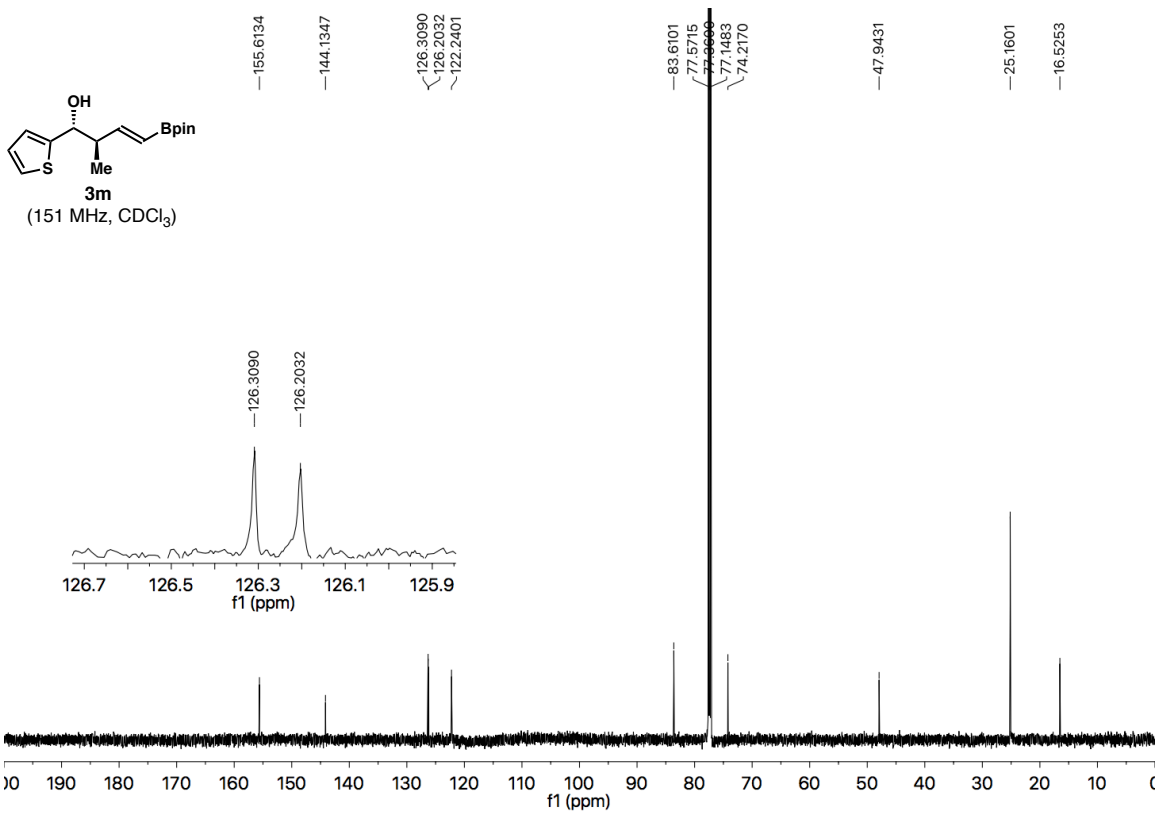

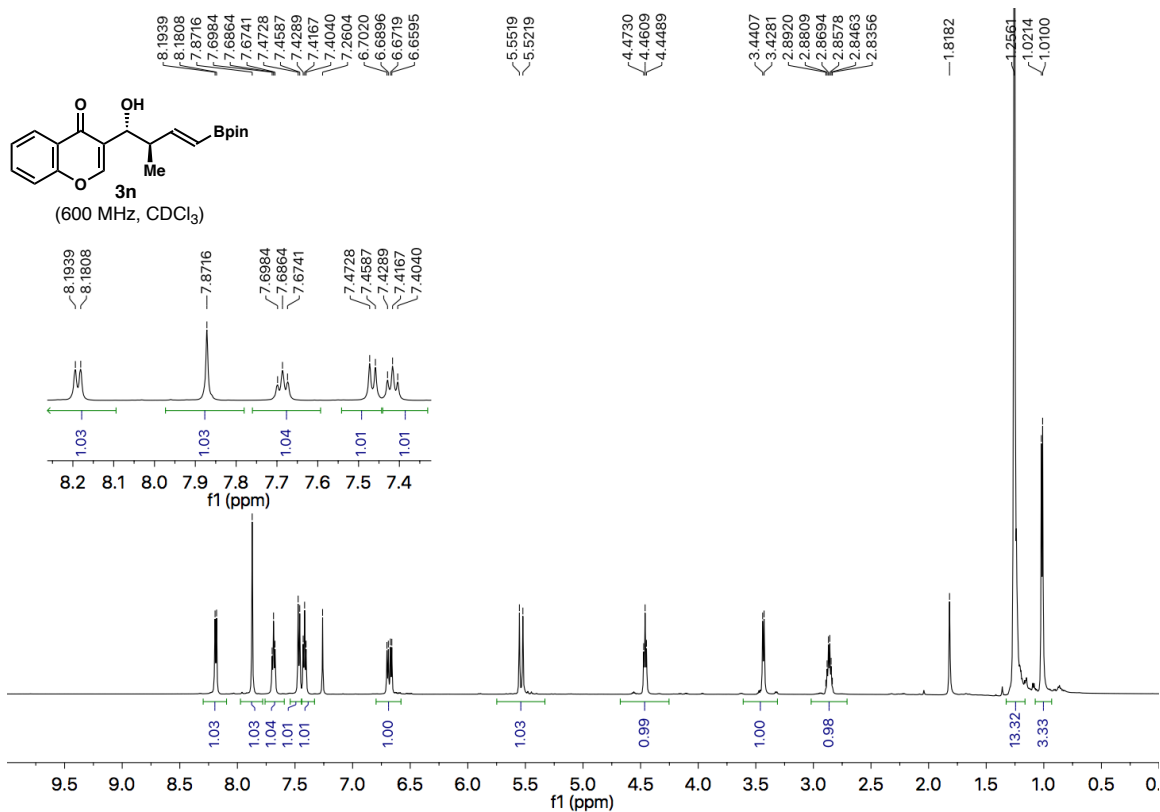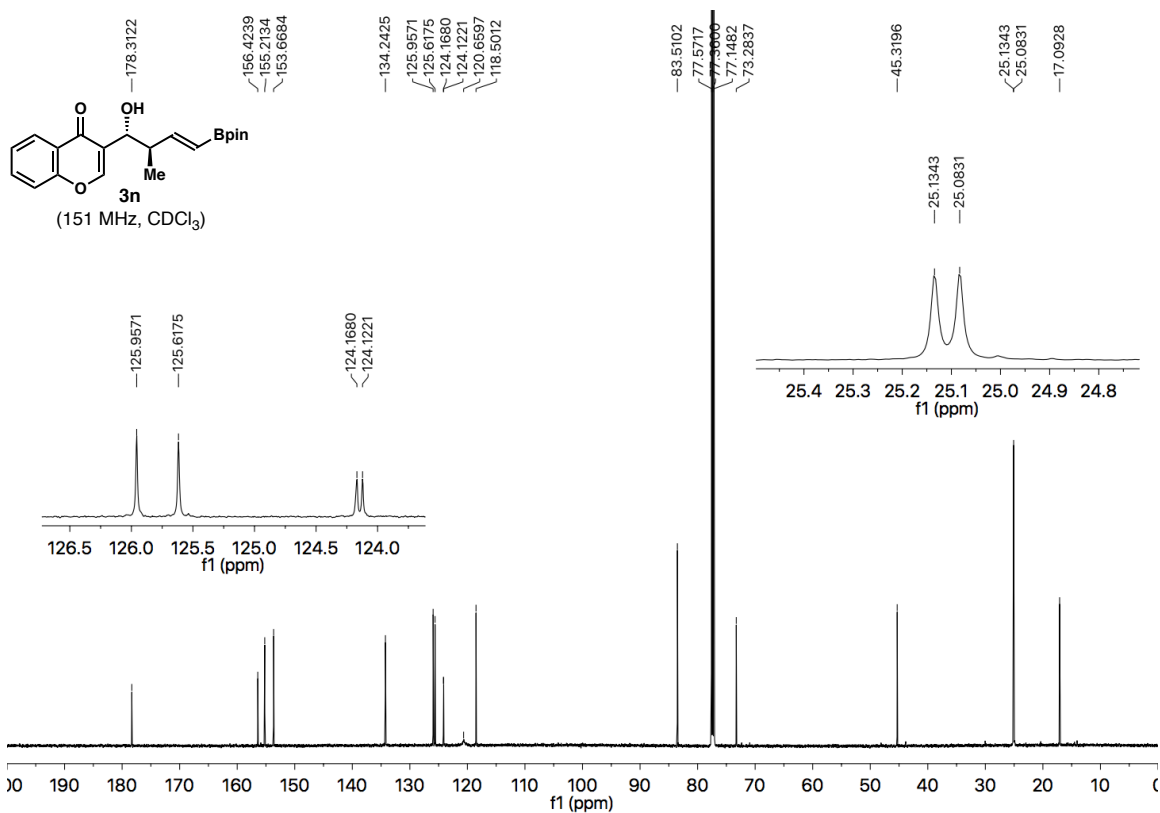

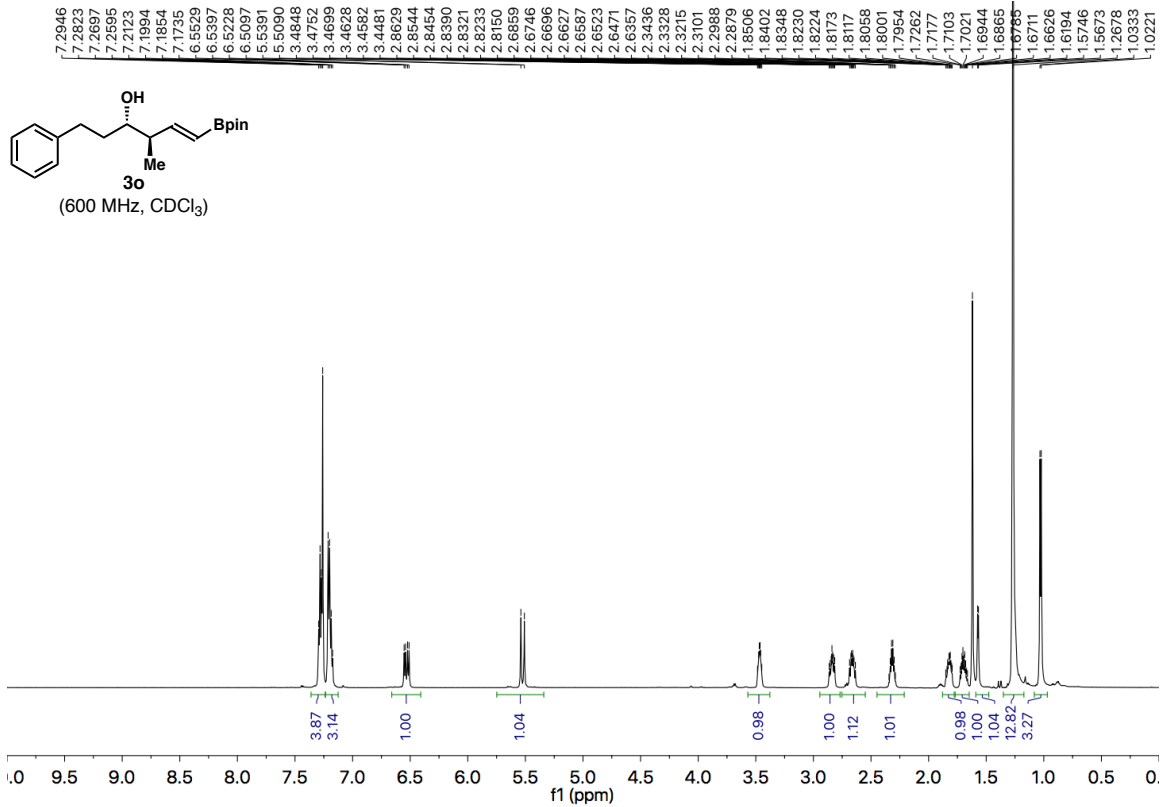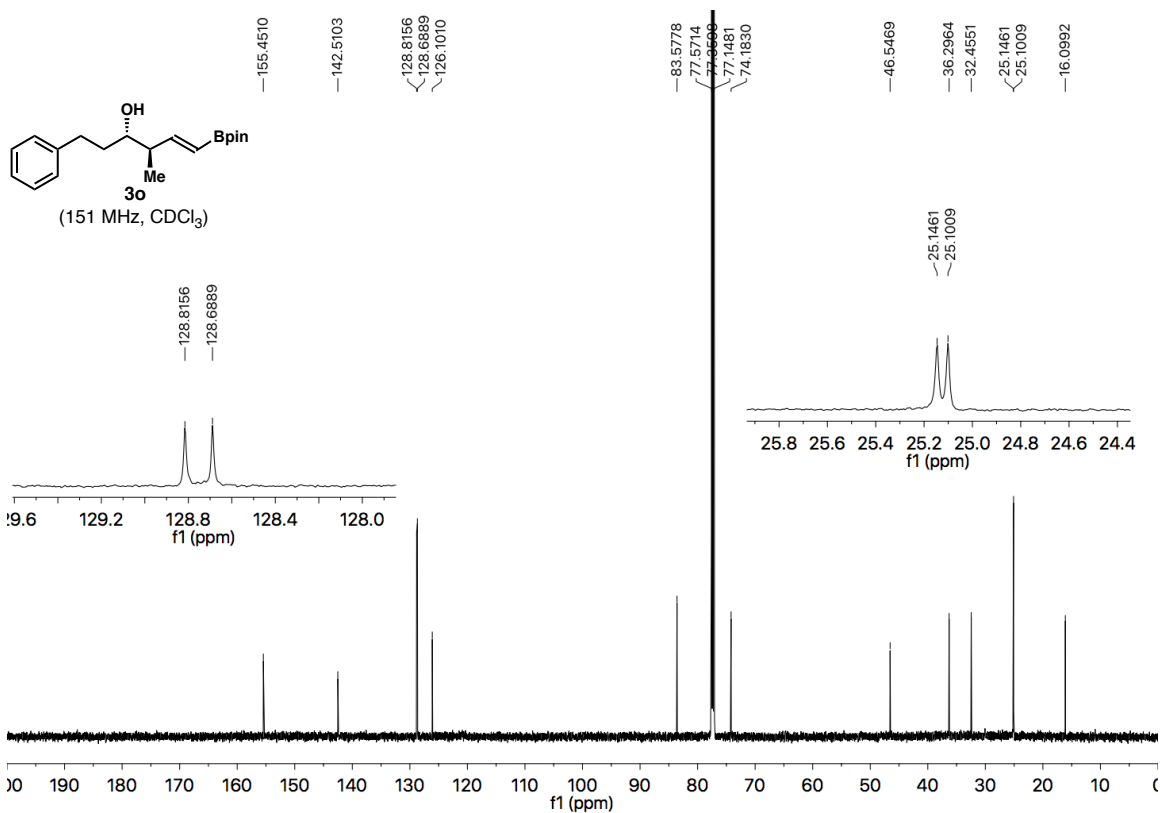

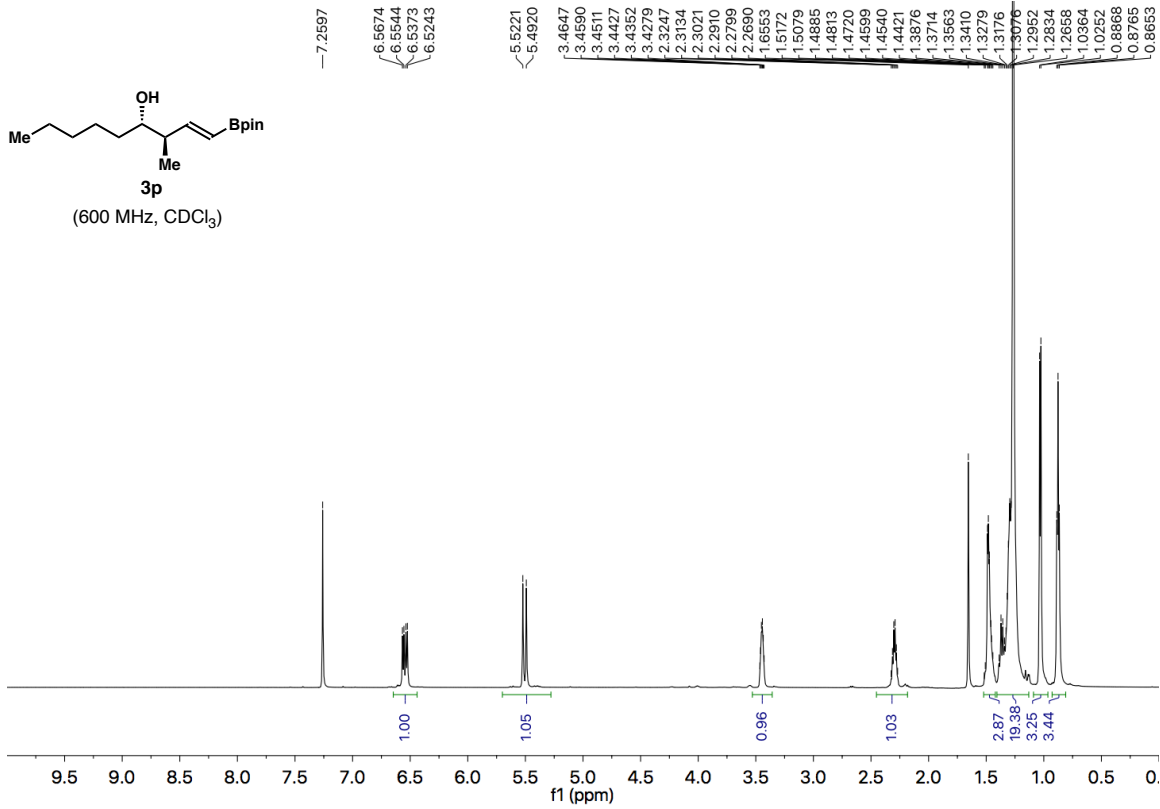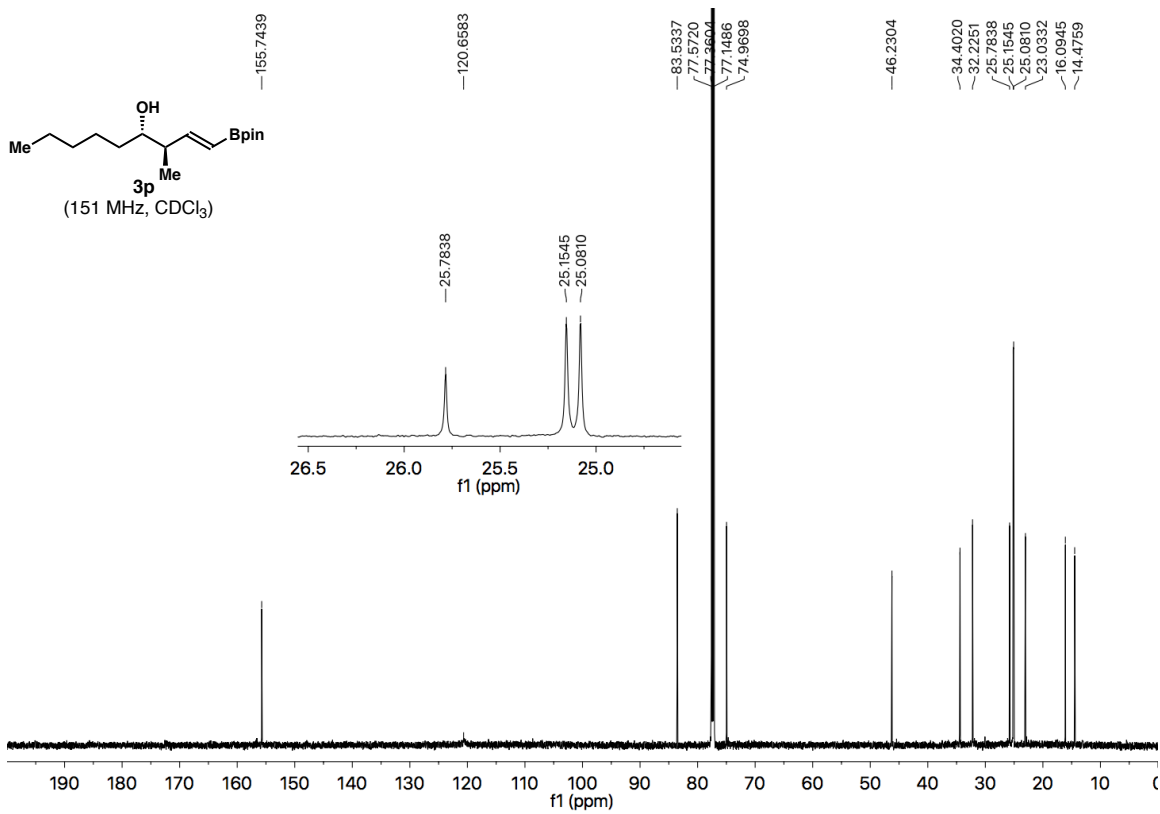

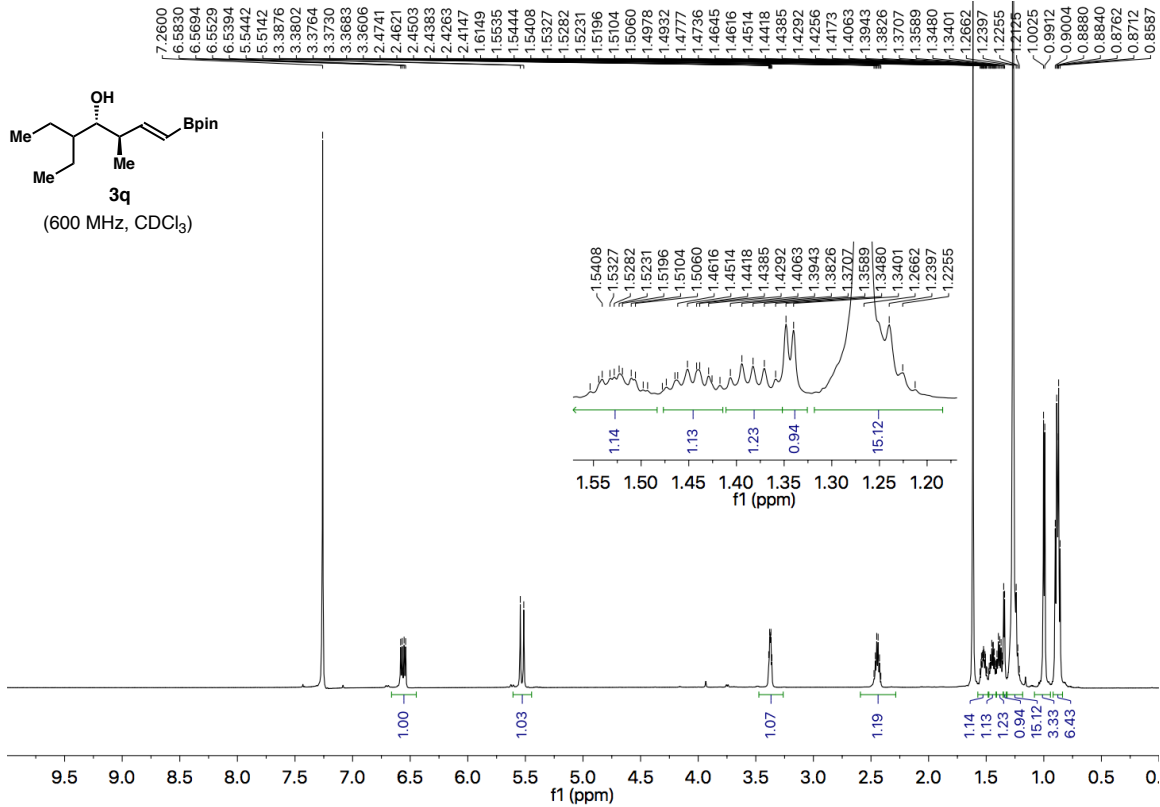



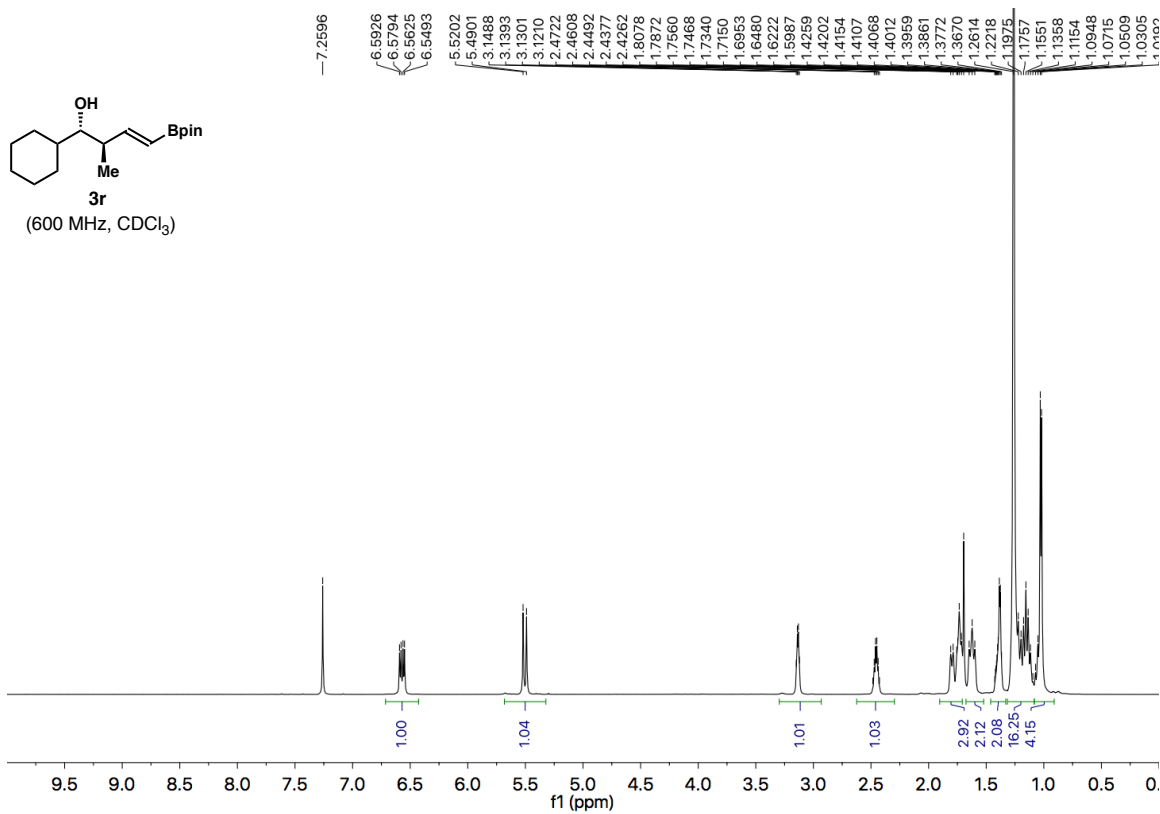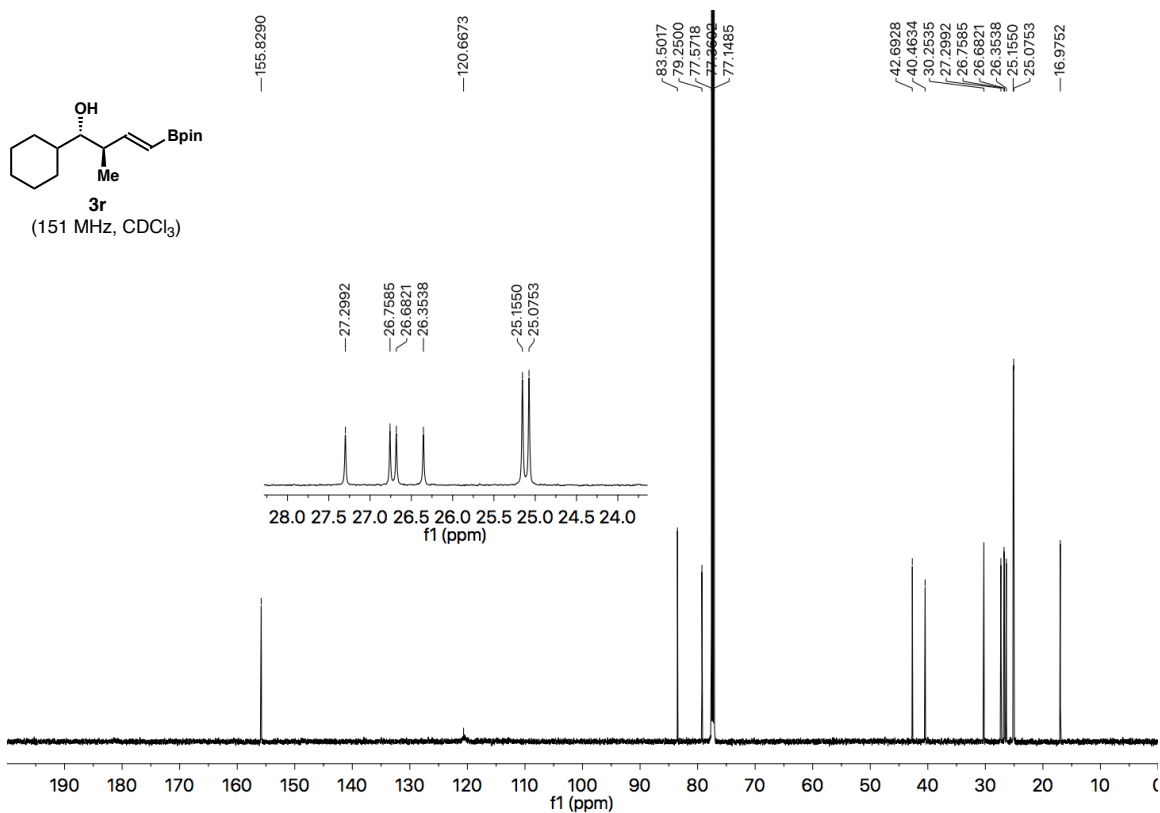

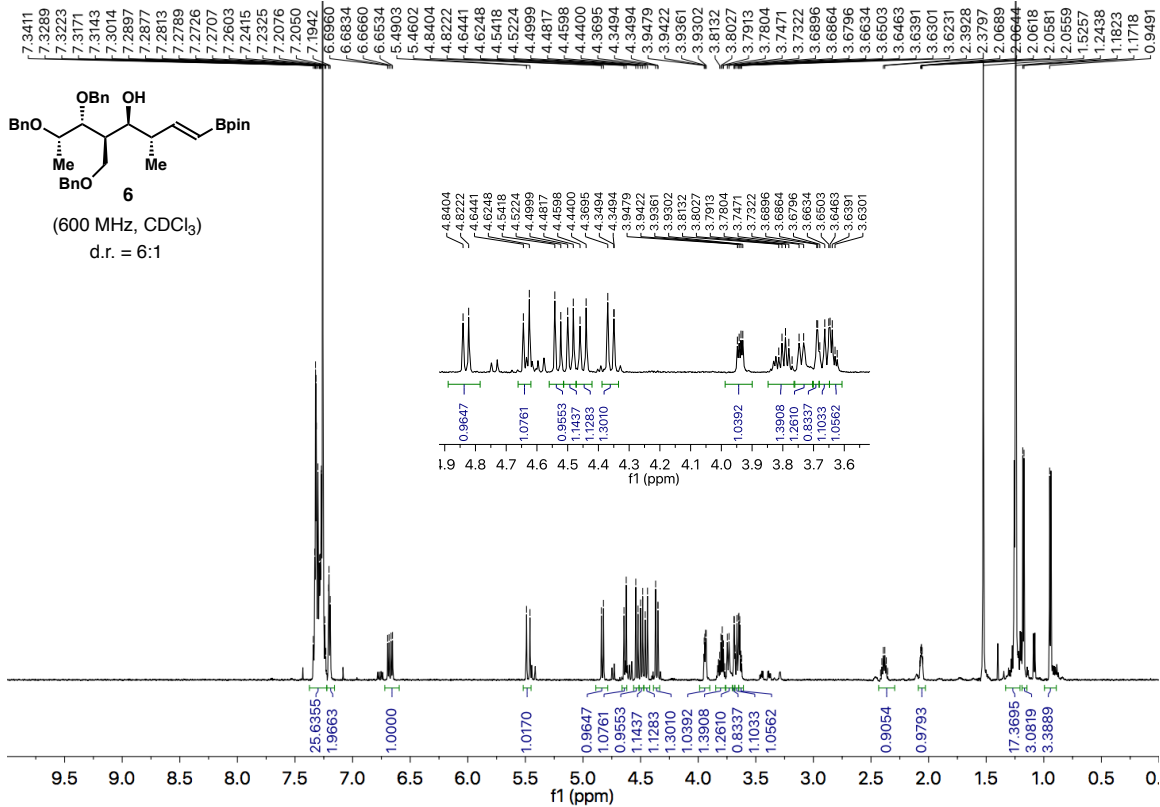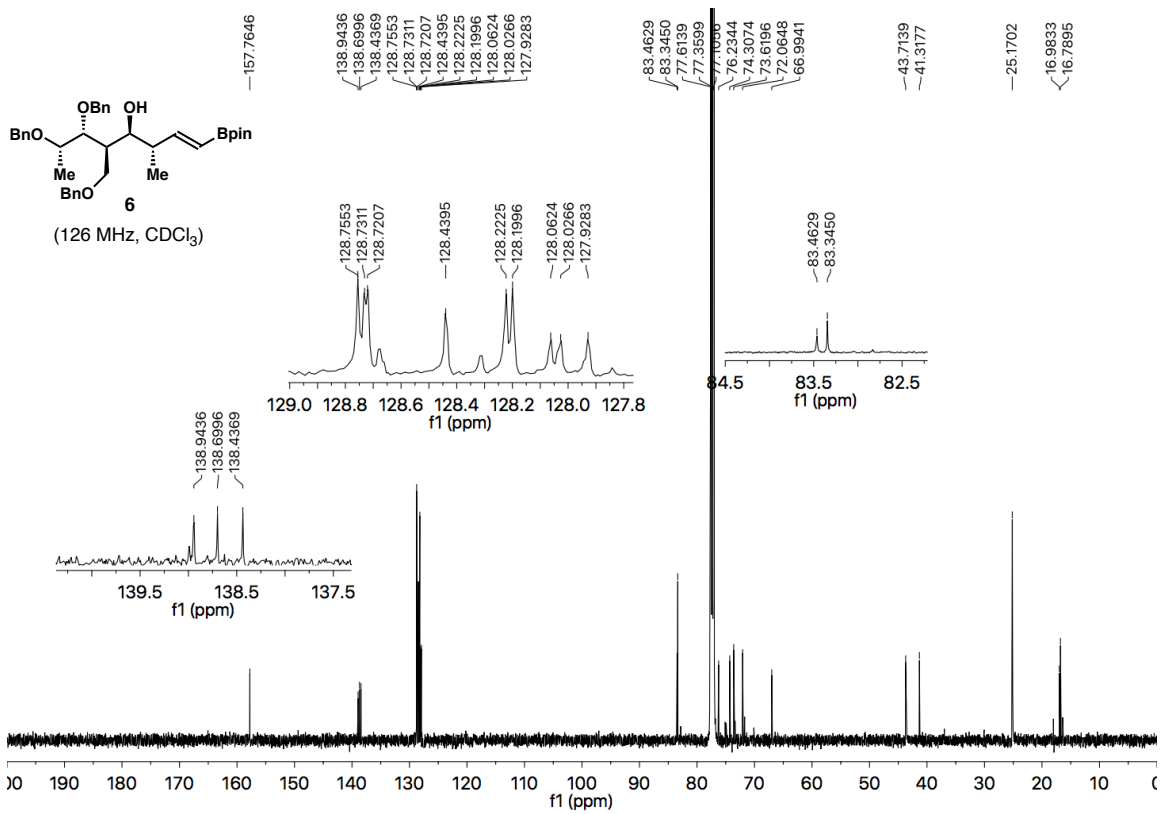

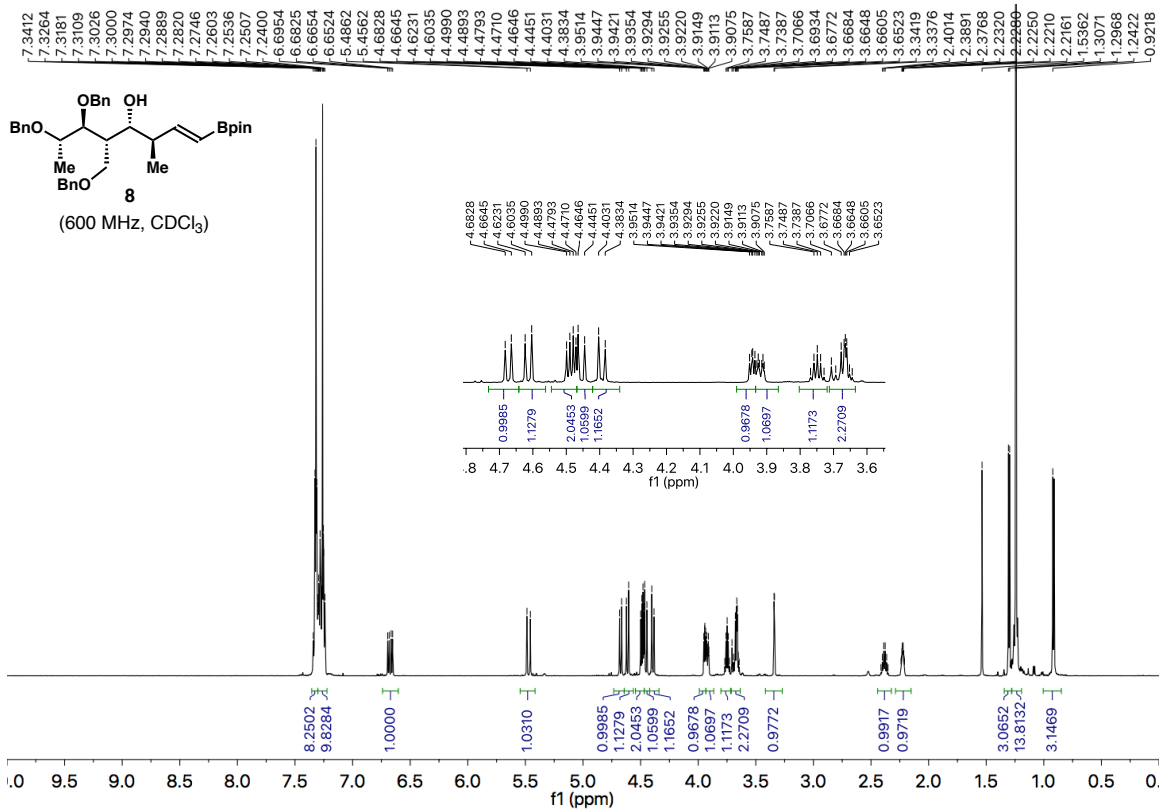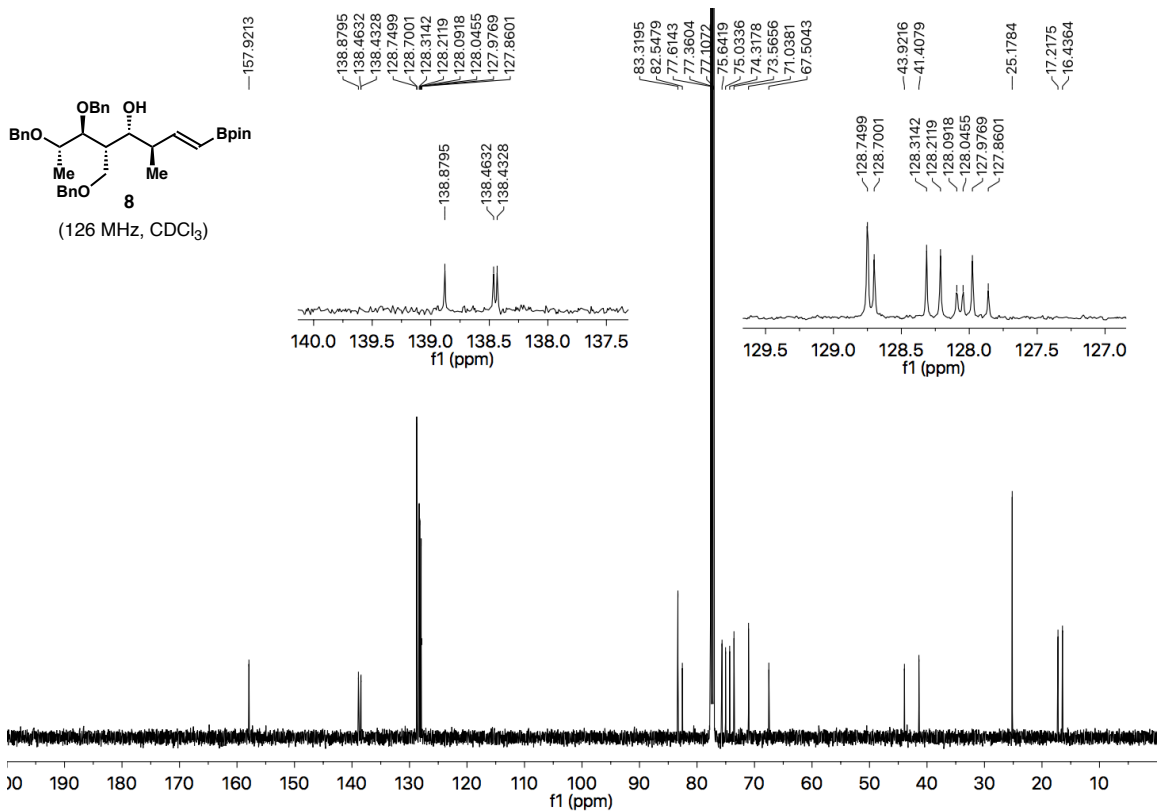

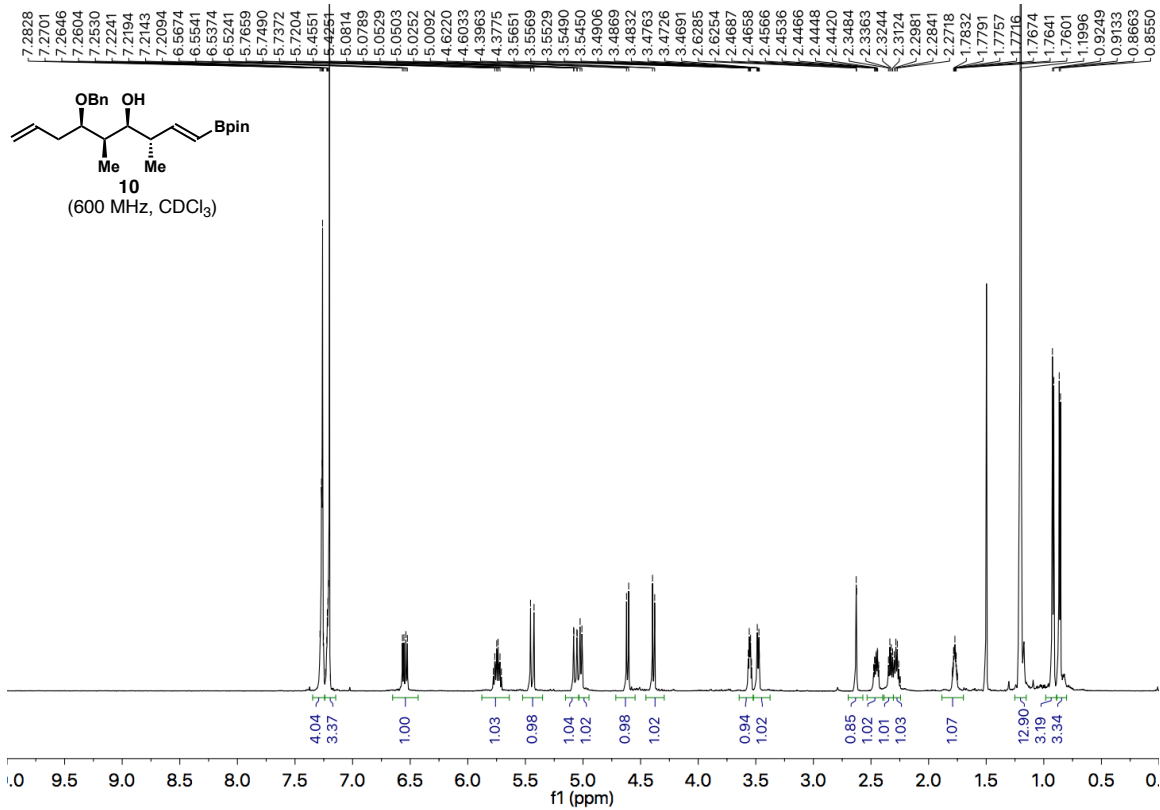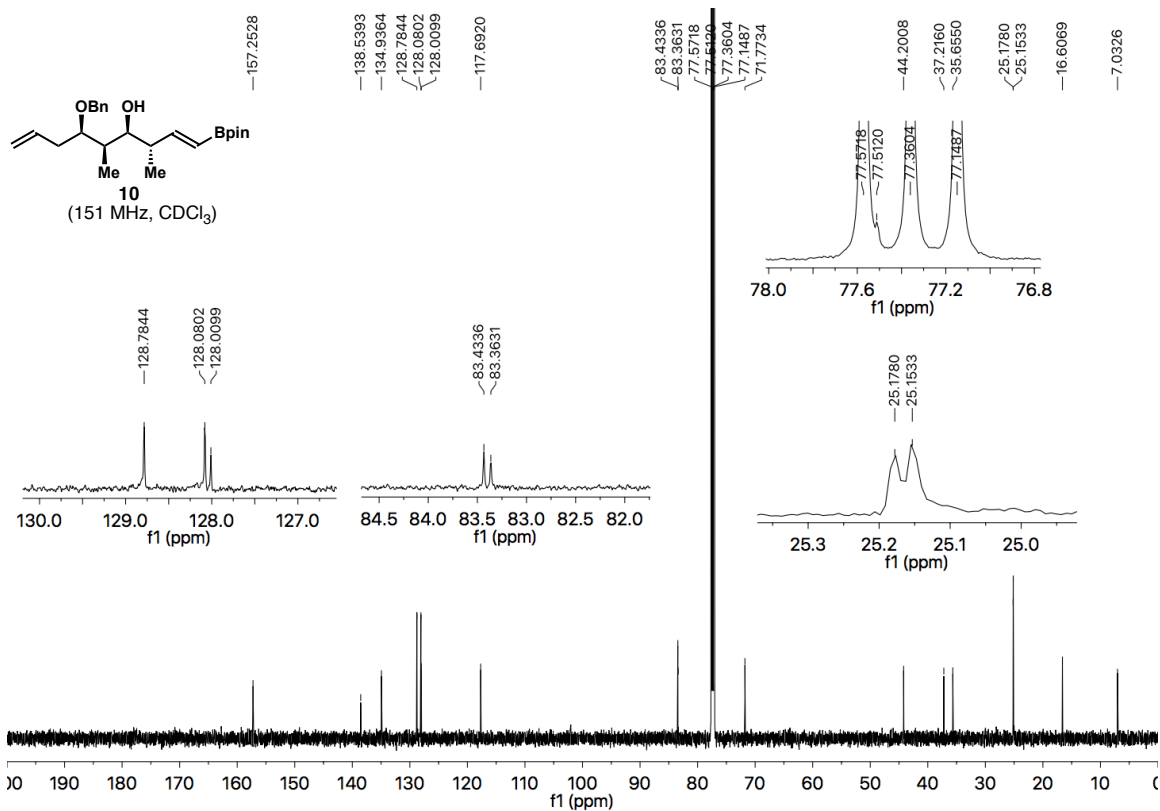



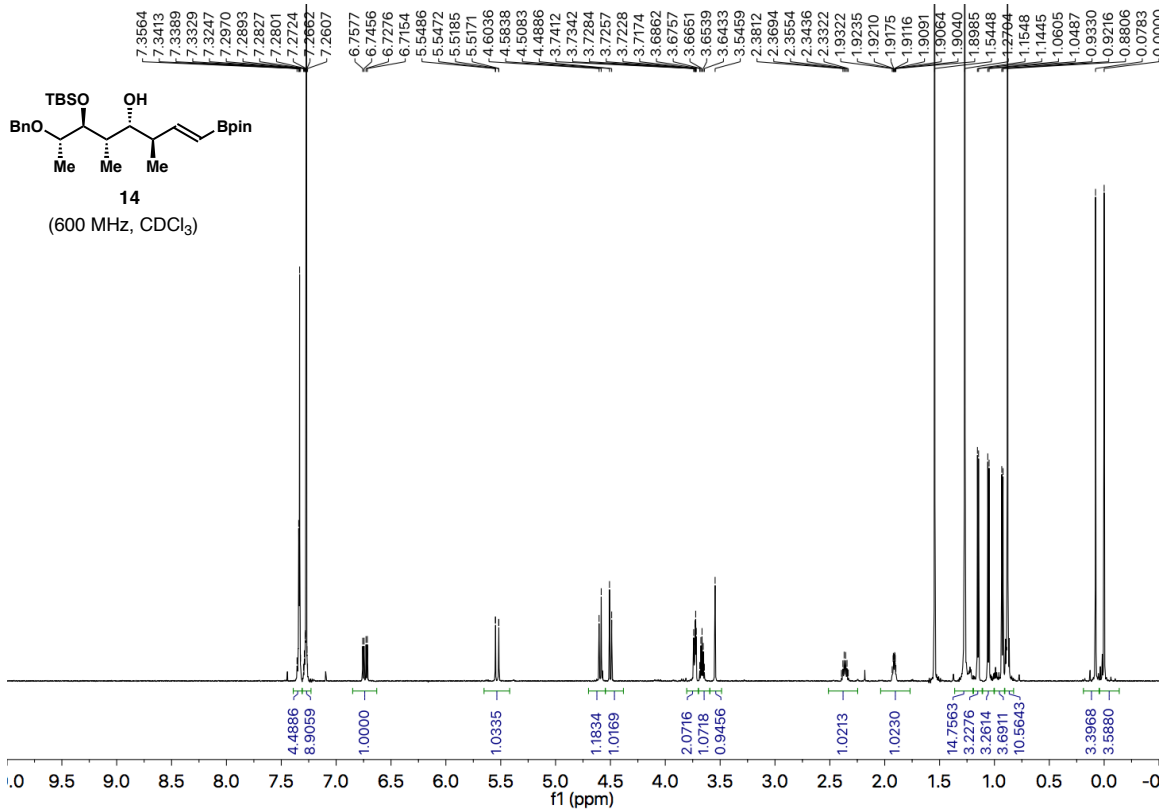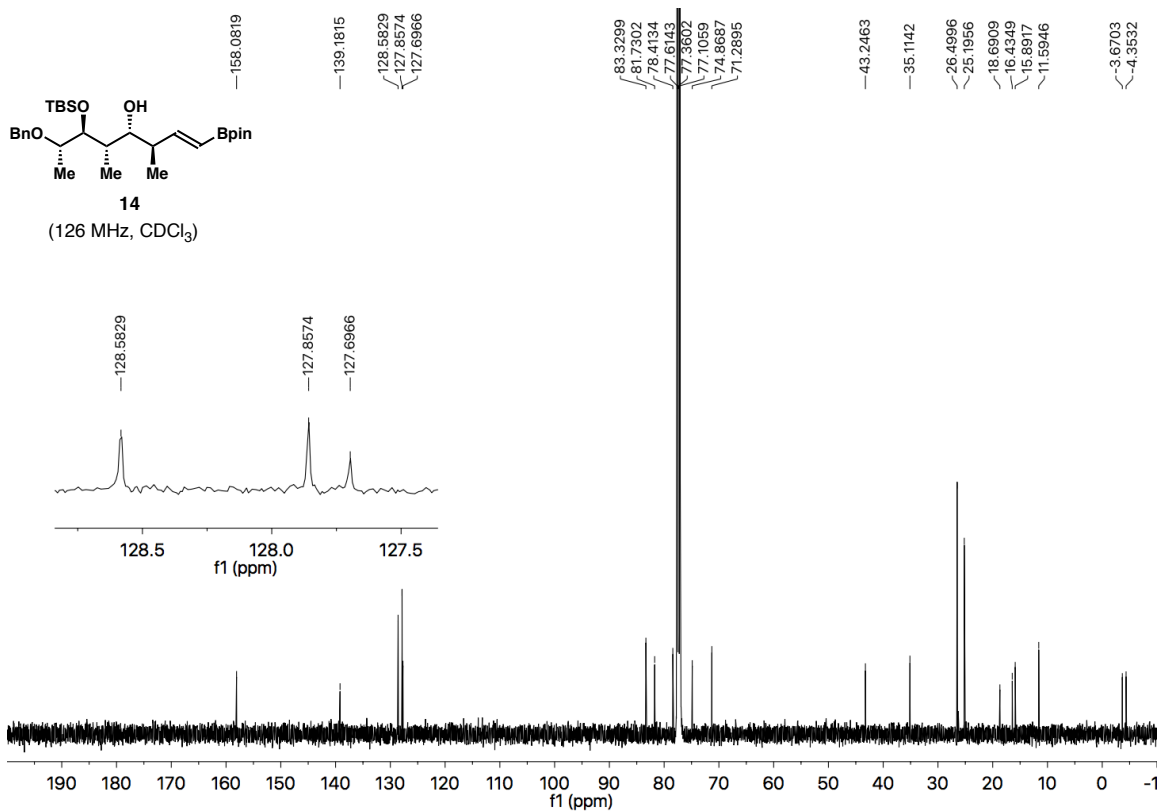



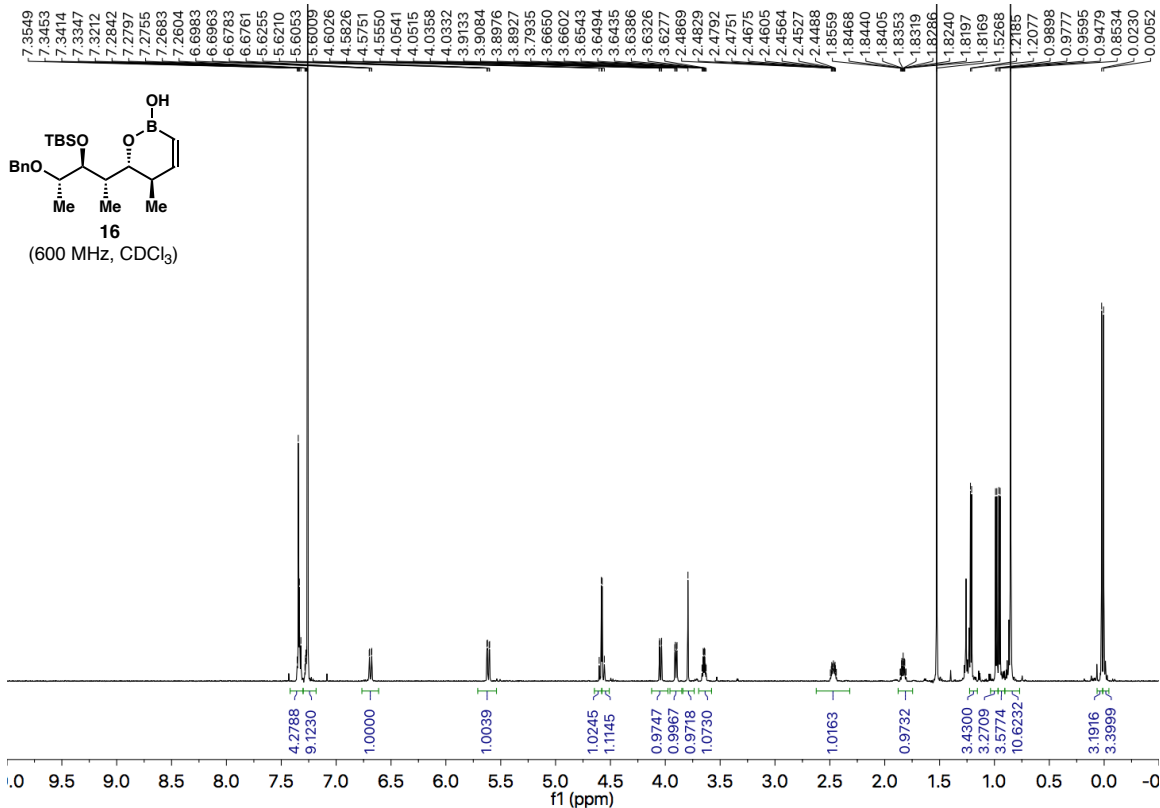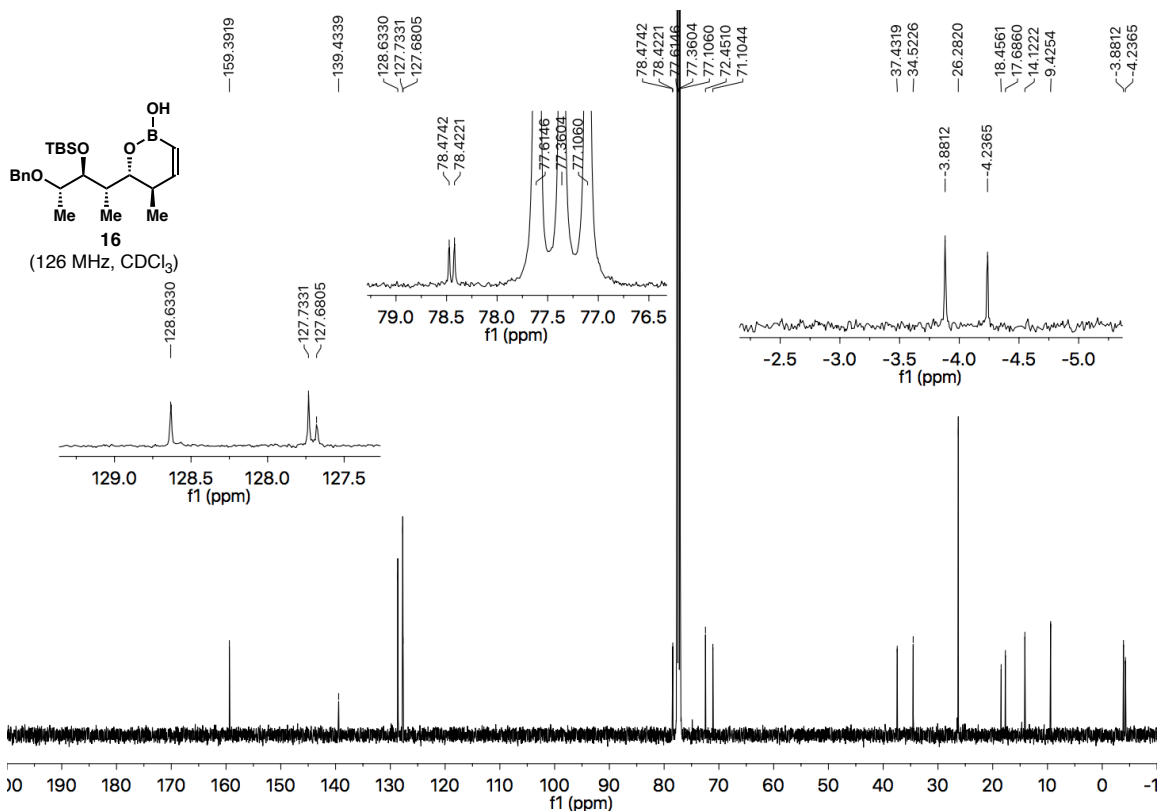



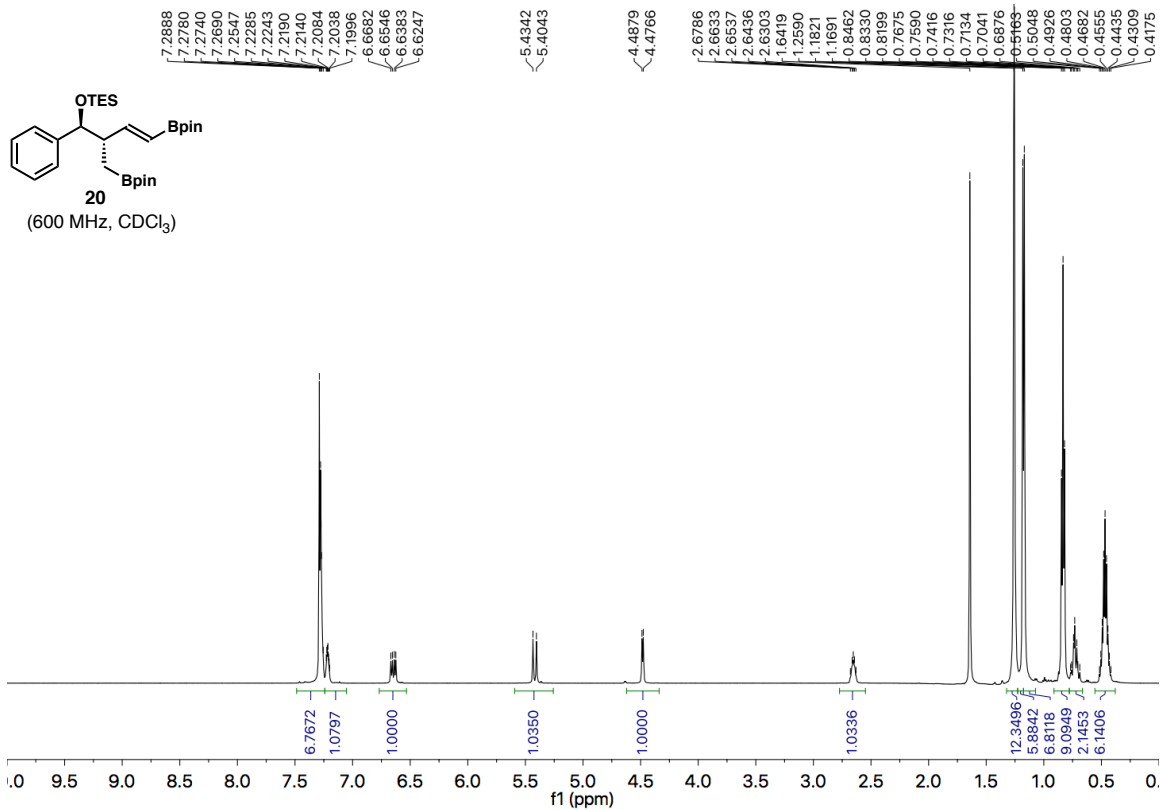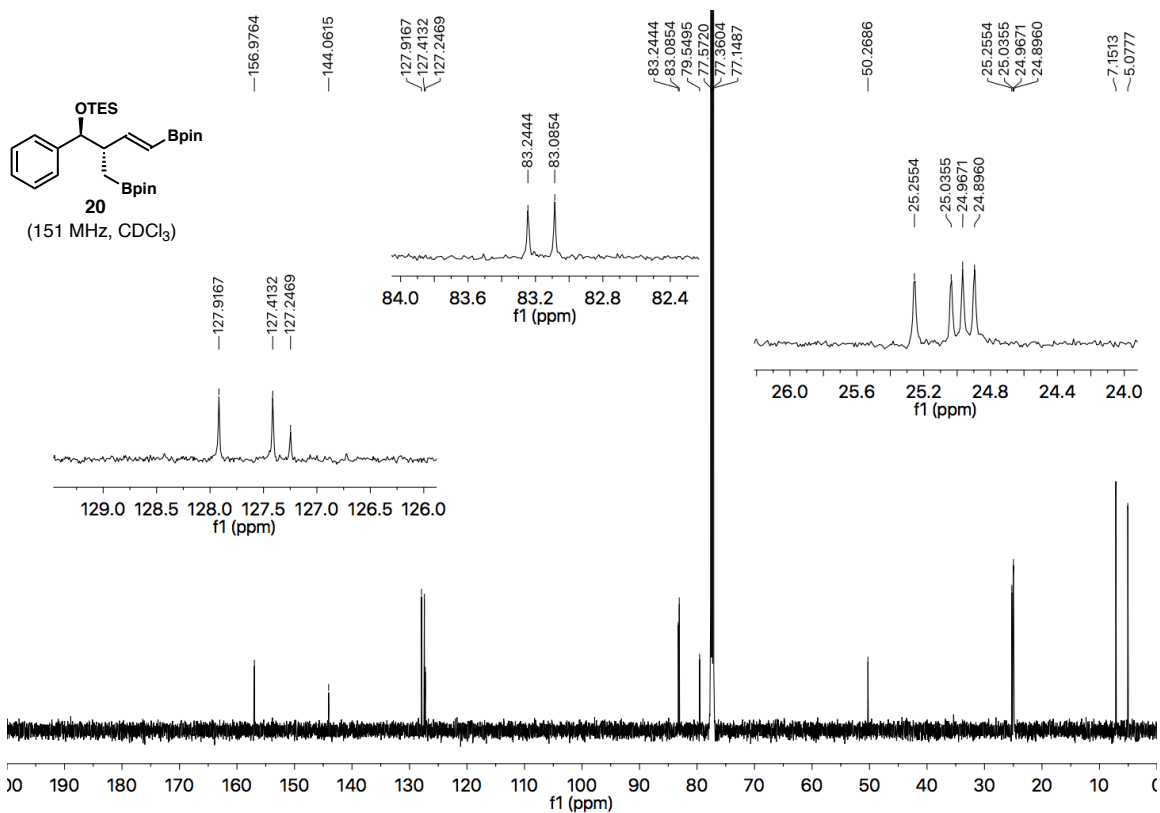

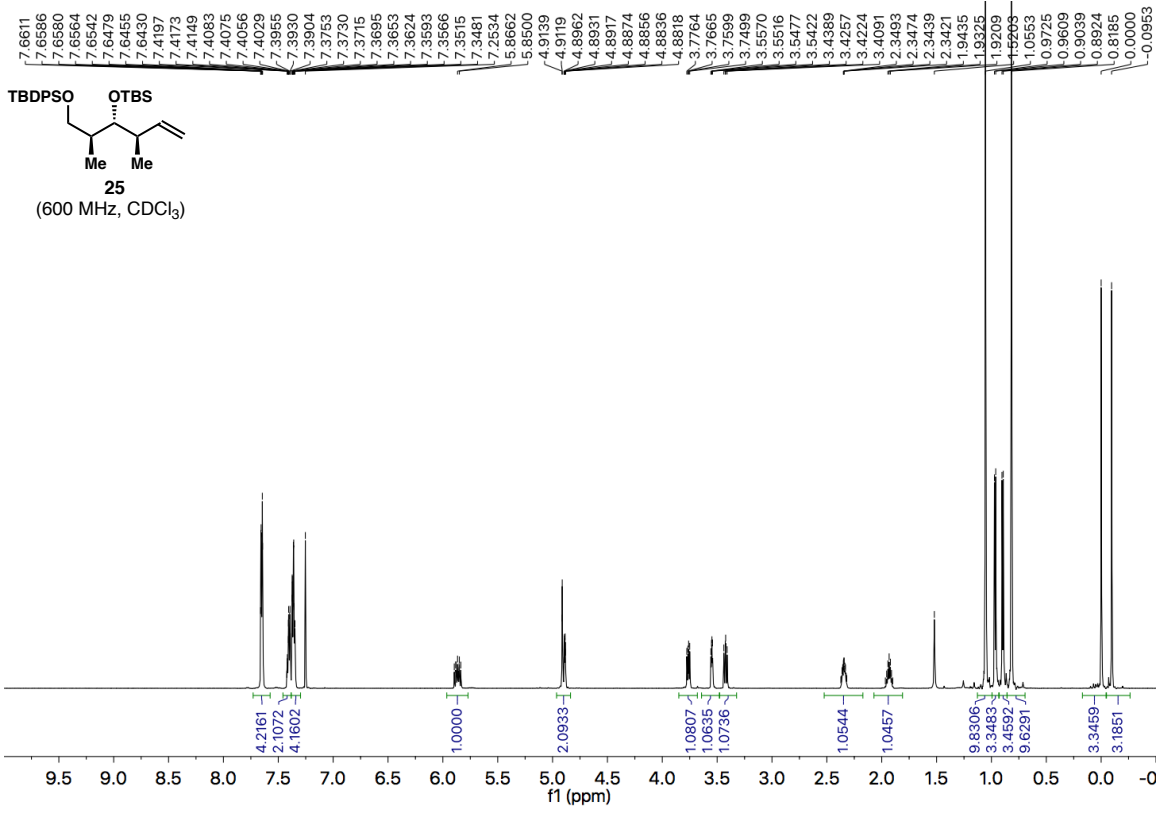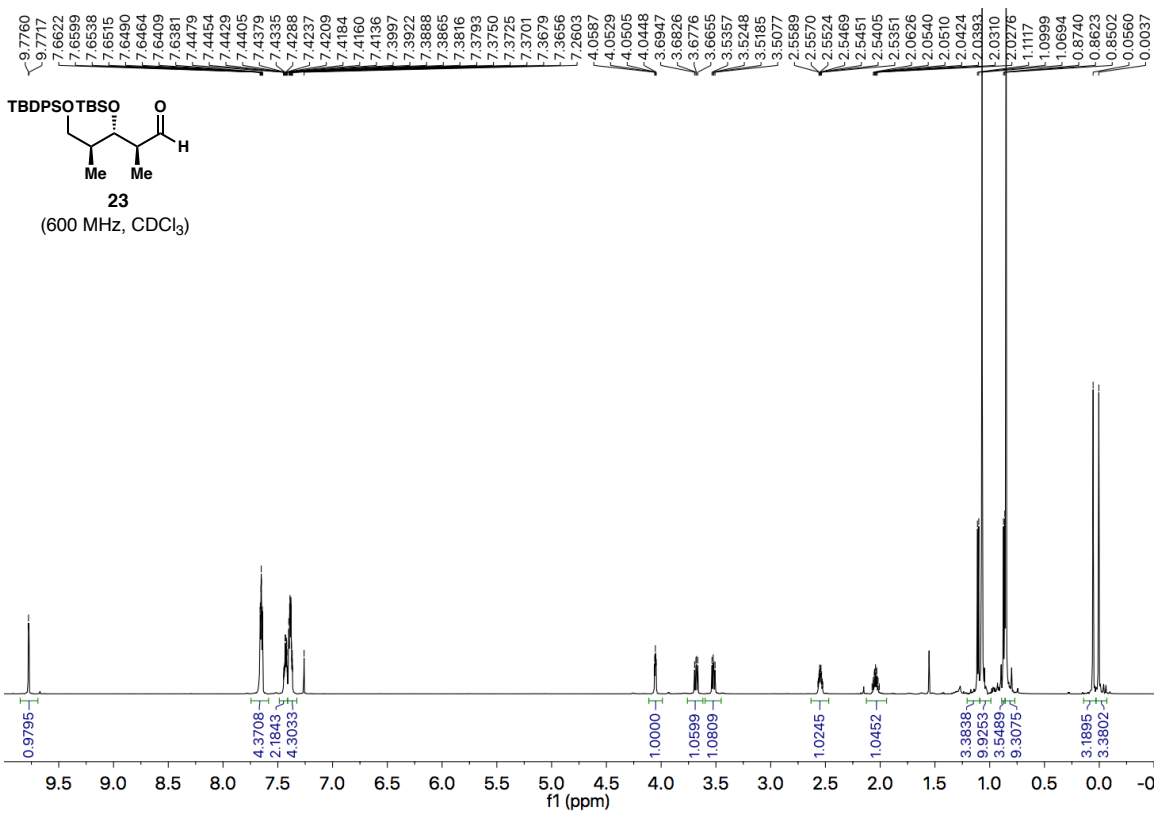

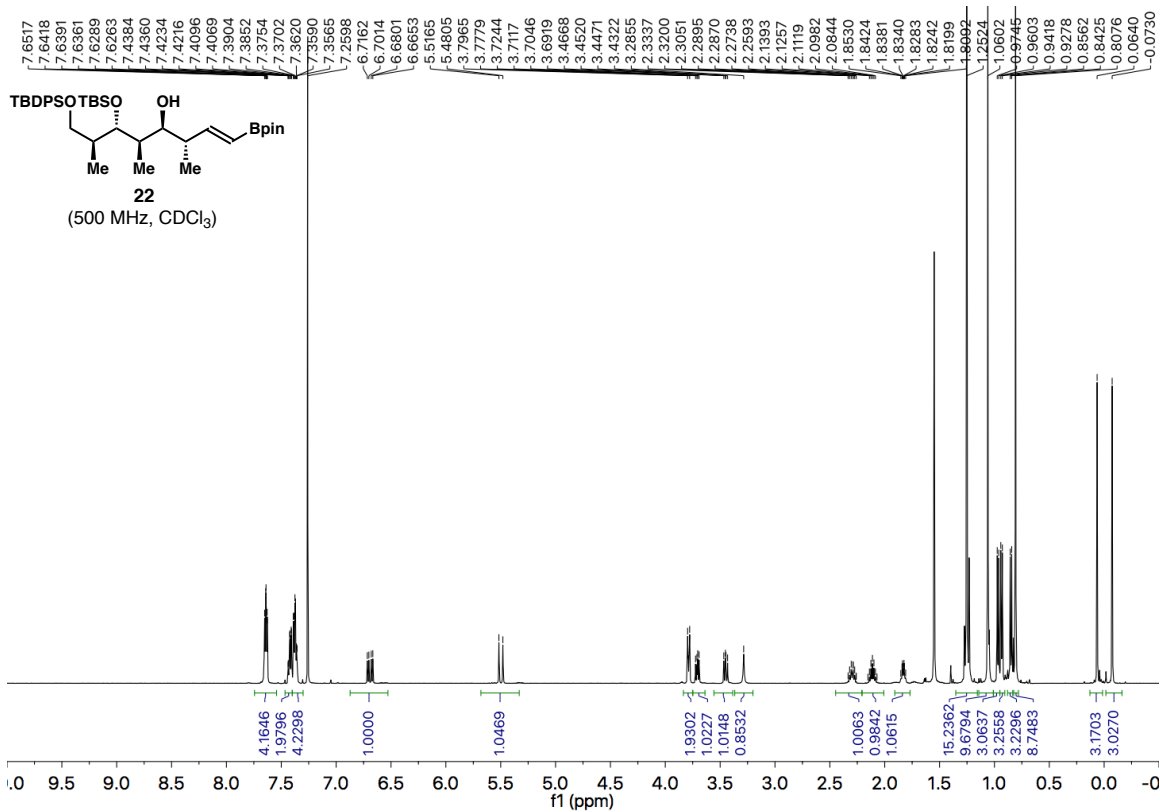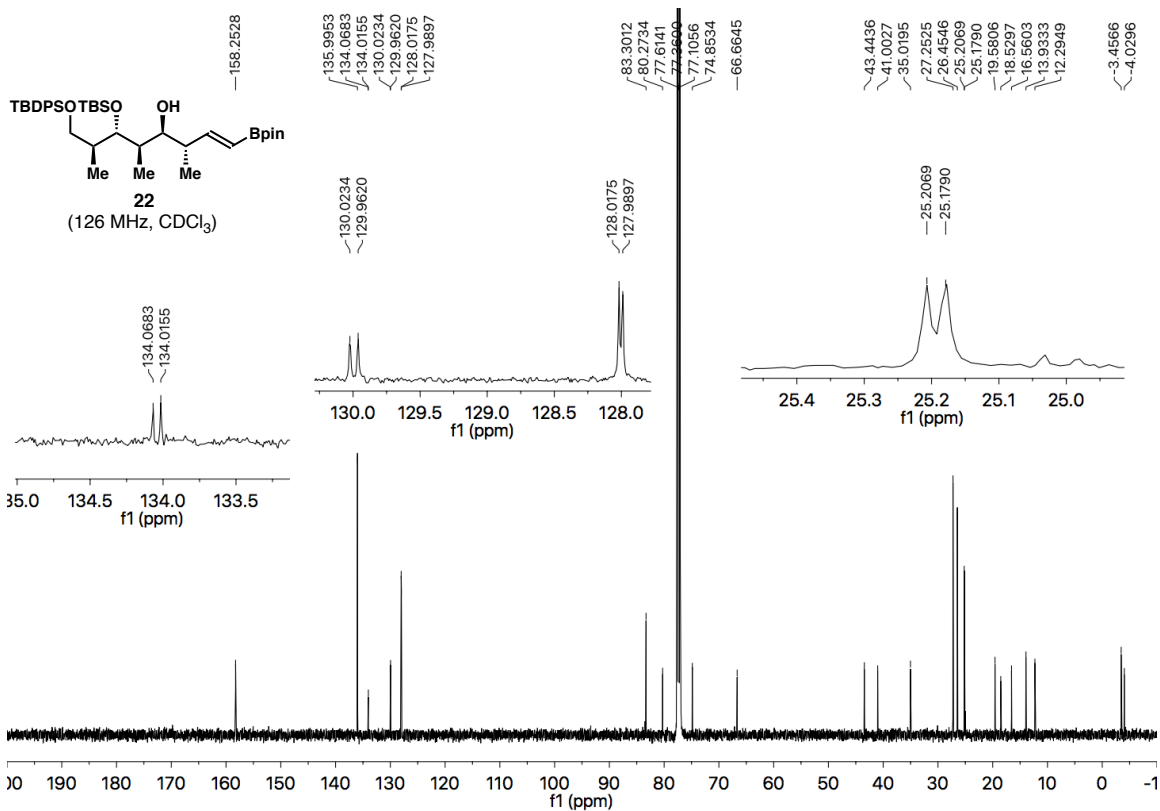

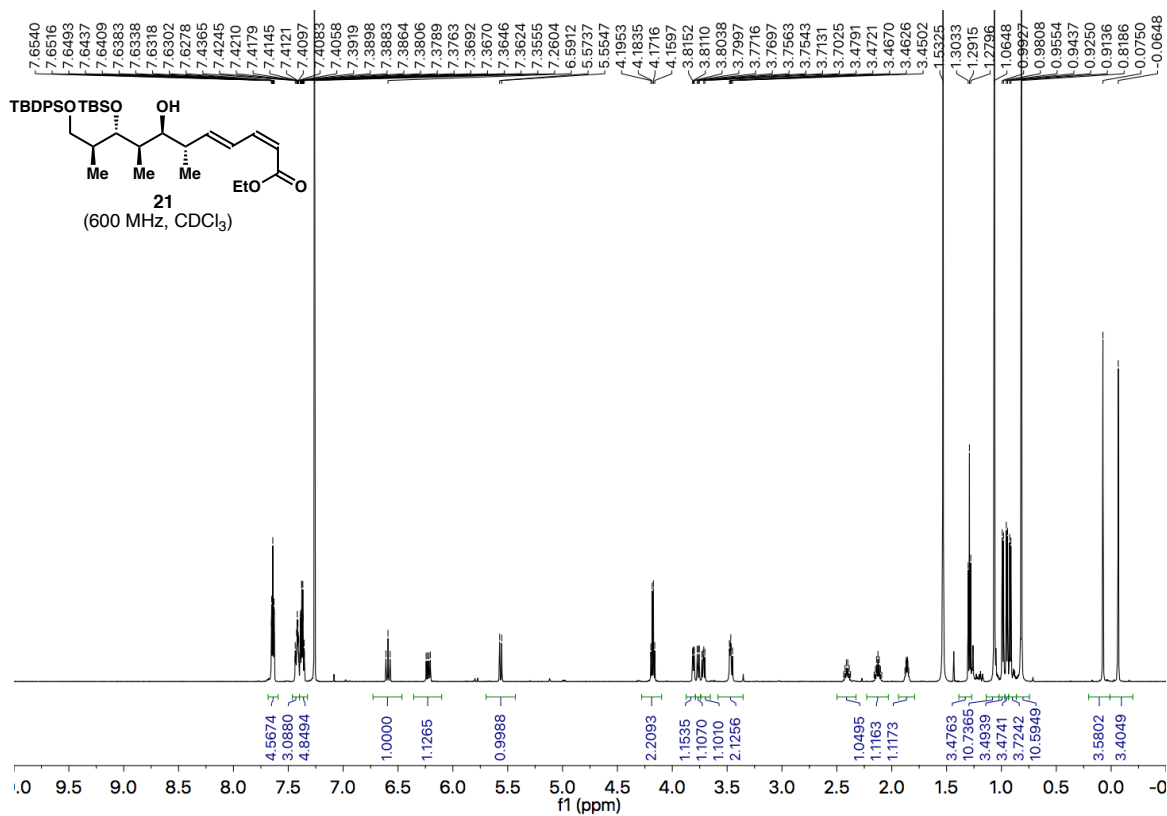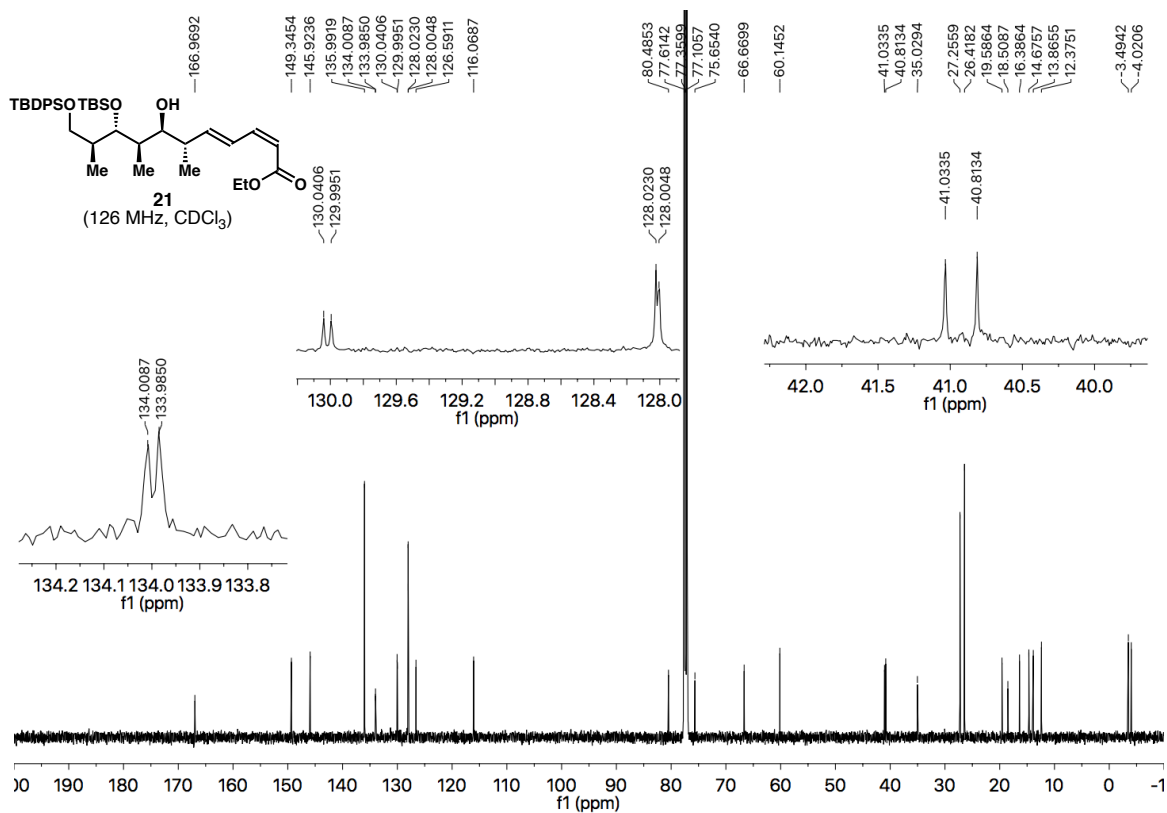

**$^{19}\text{F}$  NMR of compound 3e:**

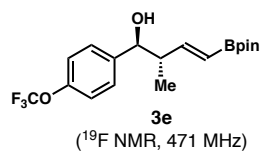

—57.8670

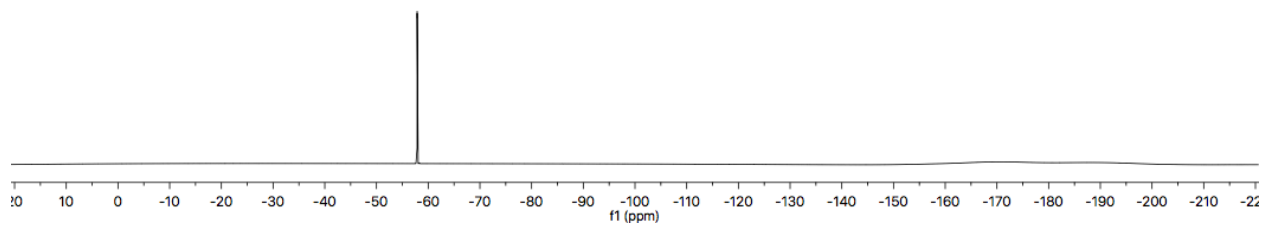

Supplement: d1cc04058h1.pdf [file d1cc04058h1.pdf]
